1 **In-vivo protein nitration and de-nitration facilitate *Vibrio cholerae* cell survival under**  
2 **anaerobic condition: Consequences of Nitrite induced protein nitration**

3 Sourav Kumar Patra, Nilanjan Sinha, Subhamoy Chakraborty, Ayantika Sengupta, Souvik Roy§  
4 and Sanjay Ghosh\*

5

6 Department of Biochemistry, University of Calcutta, 35, Ballygunge Circular Road, Kolkata-  
7 700019, West Bengal, India.

8 § Senior Laboratory Assistant, Bose Institute Proteomics Facility

9

10 Correspondence to: \* Correspondence to: Dr. Sanjay Ghosh,

11 Professor, Dept. of Biochemistry

12 University of Calcutta

13 35, Ballygunge Circular Road,

14 Kolkata-700019

15 West Bengal, India

16 Phone; 91-33-2461 5445

17 Fax: 91-33-2461 4849

18 Email: [sgbioc@caluniv.ac.in](mailto:sgbioc@caluniv.ac.in), [sgbioc@gmail.com](mailto:sgbioc@gmail.com)

19

20

21

22

23

24

25

26

27 **Protein tyrosine nitration (PTN), a highly selective post translational modification, occurs**  
28 **in both prokaryotic and eukaryotic cells under nitrosative stress<sup>1</sup>. It is reported that the**  
29 **activities of many proteins are altered due to PTN<sup>2</sup>. PTN is found to be associated with**  
30 **many pathophysiological conditions like neurodegenerative and cardiac diseases etc.<sup>3</sup>.**  
31 **However, its physiological function is not yet clear. Like all other gut pathogens *Vibrio***  
32 ***cholerae* also faces nitrosative stress in the gut environment which makes its proteome**  
33 **more vulnerable to PTN. Here, we report for the first time in-vivo PTN in *V. cholerae*. We**  
34 **show that in-vivo protein nitration is nitrite dependent and nitration-denitration**  
35 **phenomenon actually facilitates *V. cholerae* cell survival in anaerobic or hypoxic condition.**  
36 **In our study, we found that the extent of in-vivo nitration is negatively correlated with the**  
37 **intracellular nitrite content and maximum nitration occurs during log phase of *V. cholerae*.**  
38 **Most interestingly, a significant denitration was associated with increase in intracellular**  
39 **nitrate content during anaerobic incubation of aerobically grown late log phase cultures.**  
40 **In-vivo nitration could provide an avenue for toxic nitrite storage and nitrosative stress**  
41 **tolerance mechanism in many gut pathogens, whereas denitration could supply nitrate for**  
42 **cell survival in anaerobic nitrate deficient environment.**

43

44

45

46

47

48 Protein Tyrosine Nitration (PTN) is an in-vivo post translational modification which has been  
49 reported in both prokaryotic and eukaryotic cells<sup>1</sup>. PTN is found to occur in many  
50 pathophysiological settings like cardiovascular diseases, lung diseases, neurodegenerative  
51 diseases and diabetes under inflammatory conditions where cells face nitrosative stress caused by  
52 excess nitric oxide and peroxynitrite<sup>4,5,6</sup>. In PTN, Tyrosine is modified in the 3-position of the  
53 phenolic ring through the addition of a nitro group. It is believed that tyrosine nitration involves  
54 a two-step process where the initial step is the oxidation of the phenolic ring of Tyr to yield the  
55 one electron oxidation product, Tyr radical (Tyr·). The second step involves the addition of NO<sub>2</sub>  
56 to the Tyr· in a radical termination reaction<sup>7</sup>. There are two proximal nitrating agents that  
57 account for nitration in vivo. One nitrating agent is peroxynitrite which is formed by the fast  
58 reaction between nitric oxide (NO) and superoxide (O<sub>2</sub><sup>·-</sup>). The other proximal nitrating agents  
59 involve heme peroxidases such as myeloperoxidase or eosinophil peroxidase in the presence of  
60 hydrogen peroxide (H<sub>2</sub>O<sub>2</sub>) and nitrite (NO<sub>2</sub>)<sup>8</sup>. Based on the in vivo and in vitro data it is  
61 observed that PTN is a highly selective process in which the local structural environment of  
62 specific tyrosine residues governs the selectivity<sup>9</sup>. Protein tyrosine nitration caused several types  
63 of responses in terms of activity. In most cases PTN inhibits enzyme activity, in some cases  
64 activity remained unchanged and few reports show activation of the proteins or enzymes<sup>2, 10, 11,</sup>  
65 <sup>12</sup>. However, the physiological role of PTN is yet to be identified.

66 Clinical studies have showed that serum and urine of the patients suffering from cholera have an  
67 increased NO metabolite level and increased inducible nitric oxide synthases (iNOS) expression  
68 in their small intestine during infection of *V. cholerae*<sup>13</sup>. Thus, *V. cholerae* encounters NO  
69 during infection in human. During our investigation we surprisingly observed in-vivo protein  
70 tyrosine nitration under different growth phases of *V. cholerae* grown separately in rich media as

71 well as in minimal media using monoclonal nitrotyrosine antibody and LC-ESI-MS/MS analysis.  
72 A series of proteins were found to be nitrated at single tyrosine or multiple tyrosine residues. In  
73 the present study, we discovered a role of nitrite in in-vivo protein nitration of *V. cholerae*.  
74 During our study we surprisingly found de-nitration phenomenon of *V. cholerae* proteome when  
75 aerobically grown late log phase cells were incubated under anaerobic condition. We checked the  
76 cellular redox status of anaerobically incubated cells along with NO<sub>3</sub> and NO<sub>2</sub> content of the  
77 cytosol. Where, a significant increase in intracellular nitrate content was observed along with a  
78 controlled oxidative environment i.e. low GSH/GSSG. Based upon our data, it is conceivable  
79 that in-vivo nitration could provide a mechanism to store toxic nitrite inside cellular proteome  
80 without affecting *V. cholerae*'s growth. At the same time we found that nitration and de-nitration  
81 phenomenon is a cyclical process, which is essential for cellular respiration and cell survival in  
82 nutrient deprived anaerobic or hypoxic condition. In-vivo nitration could also be an impressive  
83 evolutionary adapted mechanism for nitrosative stress tolerance as it minimizes the probability of  
84 further nitration of proteome.

85

86

87

88

89

90

91

## 92 **Results**

### 93 **Growth phase specific in vivo protein nitration profile of *V. cholerae* cells grown in rich** 94 **media under aerobic condition**

95 Being a gut pathogen *V. cholerae* continuously face nitrosative stress in the local environment  
96 which is supported by the production of excess NO and its metabolites in the small intestine<sup>14</sup>.  
97 Thus we hypothesized that in vivo protein tyrosine nitration may occur in *V. cholerae*. Hence,  
98 we designed an experiment to check the in-vivo protein nitration pattern of *V. cholerae* cells in a  
99 growth phase dependent manner. For this *V. cholerae* (strain C6706) cells grown in LB media  
100 were collected at different growth phases and in vivo protein nitration was detected in cell  
101 lysates using immunoblotting with monoclonal anti nitrotyrosine antibody. The results showed  
102 an extensive protein nitration profile in all the growth phases. Interestingly, the extent of protein  
103 nitration was found to be increased during log phase and it reached maxima in the late log phase.  
104 Protein nitration was rather low in stationary phase compared to late log phase (Fig. 1). To  
105 understand whether this extensive protein nitration pattern is culture media specific or not, we  
106 checked the nitration profile of *V. cholerae* cells by growing it in M9 minimal media  
107 supplemented with 0.4% glucose. However, the trend of protein nitration profile was almost  
108 similar to that of *V.cholerae* cells grown in LB media (Fig. 2). Thus it can be concluded that in  
109 vivo protein nitration in *V. cholerae* is not media specific and cells happily grow along with  
110 these numerous nitrated proteins.

### 111 **Identification of nitrated proteins in *V. cholerae* by LC-ESI-MS/MS analysis**

112 Next we tried to identify the nitrated proteins using LC-MS analysis. As we observed numerous  
113 nitrated proteins in our previous experiment using the El Tor O1 strain C6706, we tried to

114 confirm the same in another strain N16961 belonging to the same group. For this, *V. cholerae*  
115 cells belonging to C6706 and N16961 strains were grown in LB media till the late log phase,  
116 where maximum extent of nitration was found. In LC-ESI-MS/MS proteomic analysis, we could  
117 identify 29 nitrated proteins from C6706 strain and 58 nitrated proteins from N16961 strain.  
118 Interestingly, proteins were nitrated either in single or in multiple tyrosine residues at 3- position  
119 of phenyl ring [Table-S1, S2 & S3]. There are several physiologically important proteins and  
120 enzymes in the list of nitrated proteins identified from both the O1 serotype strains. Among these  
121 proteins, several Glycolytic pathway, TCA cycle and ETC related enzymes are noticeable, i.e  
122 Phosphoenol pyruvate carboxykinase (ATP), Pyruvate dehydrogenase E1 component, Fructose-  
123 biphosphate aldolase, Dihydrolipoyl dehydrogenase, Glycerol kinase, Aconitate hydratase B  
124 and Enolase etc. Along these we also found several metabolically important proteins like  
125 Aldehyde-alcohol dehydrogenase, GDP-mannose 4\_6-dehydratase, Glutathione Reductase,  
126 Glutamine synthetase, Tryptophanase etc. as nitrated in multiple tyrosine positions. Chaperone  
127 protein like 60 kDa chaperonin, ribosomal subunit proteins such as 50s ribosomal L11, L5, L21  
128 are also important nitrated proteins in that list (Fig 3).

129 **Comparative analysis of intracellular nitrite content of different growth phases of *V.***  
130 ***cholerae* grown separately in rich media and in minimal media**

131 It has been reported that protein tyrosine nitration can be mediated by peroxynitrite as well as  
132 other species like  $\text{NO}_2^-$  or  $\bullet\text{NO}_2$ . Protein tyrosine nitration can occur through Myeloperoxidase  
133 in the presence of  $\text{NO}_2^-$  and  $\text{H}_2\text{O}_2$  which is an important process in the neutrophil degranulation  
134 at the inflammation site. Biological tyrosine nitration can also involve the action of  $\text{NO}_2^-$  under  
135 acidic conditions in the gastric lumen<sup>15</sup>. So along with the nitration profile, we further checked  
136 the intracellular nitrite content of *V. cholerae* cell free extracts (CFE) from different growth

137 phase cells grown both in LB and M9 minimal media (Fig.4). Surprisingly, we found a drastic  
138 decrease in the intracellular nitrite content as the *V. cholerae* cells progress towards log phase in  
139 LB media. Similar result was seen in the *V. cholerae* cells collected from M9 media but the  
140 extent of decrease in the intracellular nitrite content was much less, compared to the cells grown  
141 in LB. It is important to mention that in both the cases, late log phase cells showed lowest  
142 intracellular concentrations of nitrite. Intracellular nitrite content was found to be increased  
143 significantly in the stationary phase *V. cholerae* cells collected from both LB and M9 media.  
144 Interestingly, we observed a negative correlation pattern between the extent of protein nitration  
145 profile and the intracellular nitrite content of *V. cholerae* cells collected at different phases of  
146 growth i.e. higher the nitrite content of cells lower is the extent of nitration or vice versa.

147 **Nitrite could induce protein nitration in log phase *V. cholerae* cells grown in minimal media**  
148 **under aerobic condition**

149 Generally, culture media contain nitrate as well as nitrite that can facilitate the phenomenon of  
150 nitration in cells. As we found an interesting correlation between intracellular nitrite content and  
151 nitration profile in our previous experiments, so we further questioned ourselves whether nitrate  
152 or its reduced form nitrite is responsible for this in-vivo nitration. Thus we designed an  
153 experiment where we incubated early log phase *V. cholerae* cells grown in M9 minimal media  
154 with 1 mM KNO<sub>3</sub> and 1 mM NaNO<sub>2</sub> separately for 2 hours (till mid log phase) along with their  
155 untreated control set at 37°C under shaking condition aerobically. After the treatment we  
156 prepared cell lysates and checked their nitration profiles using monoclonal anti nitro tyrosine  
157 antibody (Fig. 5A). Densitometric analysis of the protein nitration blot showed a significant  
158 increase (~ 57%) in nitration in 1 mM nitrite treated early log phase *V. cholerae* cells compared  
159 to control set grown under similar experimental conditions. But no such significant increase

160 (~12%) in extent of protein nitration was observed in 1 mM nitrate treated *V. cholerae* cells (Fig.  
161 5C). So, these results directly point toward the clear fact of nitrite mediated in-vivo PTN in *V.*  
162 *cholerae*.

### 163 **Protein denitration was induced in *V. cholerae* cells under anaerobic conditions**

164 PTN is generally considered as a stress induced post translational modification in biology, which  
165 causes mostly altered functions of proteins. But here we observed that PTN is a natural  
166 phenomenon occurring in-vivo during aerobic growth phase of *V. cholerae* cells. To evaluate the  
167 status of protein nitration found in aerobic growth, we designed an experiment where, we did an  
168 en masse transfer of late log phase *V. cholerae* culture grown in aerobic condition into anaerobic  
169 condition and incubated that system at 37°C in shaking condition for 18 hours along with its  
170 aerobic set. Then we checked the protein nitration profile of anaerobically grown cells against its  
171 aerobic stationary control set using western blot analysis. Our results showed a significant 37%  
172 decrease in the extent of nitration of the anaerobic set compared to its aerobic control set (Fig. 6).  
173 Thus it can be concluded that *V. cholerae* cells showed in-vivo protein tyrosine nitration during  
174 aerobic growth and protein de-nitration was prominent during anaerobic or hypoxic phase.

### 175 **Nitrite to nitrate conversion facilitate stationery phase *V. cholerae* cell survival under** 176 **anaerobic condition**

177 It has been reported in earlier studies that nitrate reductase enzyme is essentially required for  
178 nitrate dependent anaerobic respiration in different microorganisms as well as in *V. cholerae*,  
179 where the enzymatic reduction product of nitrate is nitrite<sup>16,17</sup>. In our previous experiments, we  
180 found a direct evidence of nitrite mediated protein nitration in *V. cholerae* cells and a denitration  
181 phenomenon was also observed in *V. cholerae* proteome during anaerobic incubation at



182 stationary phase. So, keeping these findings in mind, we checked the intracellular nitrite as well  
183 as the nitrate content of *V. cholerae* stationary phase cells incubated in anaerobic conditions and  
184 compared them with aerobically incubated cells. We found no significant increase in nitrite  
185 content of anaerobically incubated stationary phase cells ( $5 \pm 1.7$  nmoles of  $\text{NO}_2/\mu\text{g}$  proteins)  
186 compared to its aerobic control set ( $3.8 \pm 0.37$  nmoles of  $\text{NO}_2/\mu\text{g}$  proteins). But we found a  
187 significant increase ( $\sim 2.2$  fold) in nitrate in anaerobic set compared to aerobic control set. The  
188 concentration of nitrate in aerobically grown *V. cholerae* was  $2.78 \pm 0.3$  nmoles nitrate / $\mu\text{g}$   
189 protein whereas  $6.2 \pm 1.1$  nmoles nitrate/ $\mu\text{g}$  protein was found in anaerobic set up (Fig. 7). This  
190 result is corroborated well with previous report where exogenous nitrate treatment under  
191 anaerobic condition facilitated *V. cholerae* cell survival<sup>18</sup>. Thus it can be concluded that cellular  
192 nitrate pool is enriched under anaerobic condition which actually facilitate cell survival under  
193 anaerobic respiration. Moreover, increased nitrate content is directly linked with the de-nitration  
194 of proteome which ensures supply of nitrite into intracellular environment.

### 195 **Cellular redox status supports nitrite to nitrate conversion under anaerobic condition**

196 In our previous experiment we found an increased intracellular nitrate content in anaerobically  
197 incubated stationary phase cells compared to its aerobic control set. Protein denitration generates  
198 soluble nitrite inside the cell which is not useful for the *V. cholerae* but also highly toxic. So the  
199 nitrite generated from the de-nitration must have been oxidized and converted into the nitrate  
200 inside the cells to keep a continuous supply of nitrate for cell survival under anaerobic condition.  
201 Intracellular environment is reducing in nature in all types of cells starting from prokaryotes to  
202 higher eukaryotes except in Golgi apparatus where oxidizing environment is required. So, to  
203 check the possibility of nitrite to nitrate conversion inside the stationary phase *V. cholerae* cells,  
204 we assessed the redox environment of the same under anaerobic as well as aerobic conditions.

205 We determined total glutathione, oxidized glutathione (GSSG), reduced glutathione (GSH), as  
206 well as GSH/GSSG ratio. The GSH content was significantly higher in aerobic set of *V. cholerae*  
207 cells ( $46.35 \pm 4.5$  nmole/mg protein) than the anaerobic set ( $29.3 \pm 7$  nmole/mg protein).  
208 However, the GSSG content was not increased much in anaerobic set ( $2.58 \pm 0.2$  nmole/mg  
209 protein) compared to its aerobic counterpart ( $1.2 \pm 0.26$  nmole /mg protein). Thus the significant  
210 decrease in GSH content of stationary phase *V. cholerae* cells incubated under anaerobic  
211 conditions ultimately resulted in ~3.5 fold decrease in GSH/GSSH ratio compared to its control  
212 aerobic set (Fig. 8). So it can be concluded that a relatively oxidizing environment is prevailed  
213 inside *V. cholerae* cells under anaerobic condition, which promote the conversion of nitrite to  
214 nitrate and facilitates the cell survival.

## 215 **Discussion**

216 The virulence factors and the pathobiology of the disease cholera are well characterized<sup>19</sup>. Inside  
217 the human gut, *V. cholerae* faces several host inflammatory stresses including nitrosative and  
218 oxidative stress. In this stressful condition post translational modification like protein tyrosine  
219 nitration (PTN) and its related detrimental effect is quite eminent as well as unavoidable by any  
220 gut pathogen. Along with this, presence of a prominent hypoxic environment in gut should make  
221 *V. cholerae* hard to survive theoretically. But the practical scenario is quite different which  
222 shows that *V. cholerae* cells are quite capable of coping up with these harsh conditions not only  
223 by continuing the survival but also by population expansion.

224 In our study we found in-vivo protein tyrosine nitration in *V. cholerae* irrespective of particular  
225 growth media. Interestingly, the extent of nitration was found to be highest during its log phase.  
226 This indicates that unlike most organisms where protein nitration is overall detrimental, *V.*

227 *cholerae* is not only tolerant to PTN but it can naturally thrive with this post translational  
228 modification on multiple proteins. Most interestingly, our LC-ESI-MS/MS data showed that  
229 these multiple proteins include housekeeping proteins as well as important metabolic proteins.  
230 In the search of the source, we found that in-vivo nitration is directly governed by nitrite. During  
231 our study we came across a very in-depth research article related to *V. cholerae* published by  
232 *Bueno et al.*,<sup>18</sup> in the year 2018. *Bueno et al.* gave an elaborate relation among the following: i)  
233 nitrate reductase (*napA*) mediated anaerobic respiration, ii) low pH dependent increased cell  
234 viability with decreased population expansion and iii) exogenous nitrate treatment. They found  
235 higher level of nitrite in growth media when they administrated exogenous nitrate during  
236 hypoxic growth, as *V. cholerae* lacks nitrite reductase<sup>20</sup>. In addition to their study, our finding of  
237 in-vivo nitration in aerobic culture showed another possible fate of endogenous nitrite. In-vivo  
238 nitration could also be another way to entrap more toxic nitrite without causing harm to cell in  
239 anaerobic condition. In the quest to understand the significance of in-vivo nitration, we further  
240 found de-nitration phenomenon of *V. cholerae* proteome and increase in intracellular nitrate  
241 during anaerobic incubation of aerobically grown late log phase culture. In a similar experiment  
242 when we imparted anaerobicity to *V. cholerae* culture grown aerobically till early log phase, we  
243 found reverse results i.e. increased in-vivo nitration in anaerobic set (Supplementary Fig. 1). The  
244 different observations are due to the nutrient i.e. nitrate rich conditions of mid log culture media  
245 compared to nutrient deficient i.e. nitrate deficient late log phase media. This result also  
246 indirectly proved our theory of nitrite induced in-vivo nitration because of *napA* overexpression  
247 during anaerobic condition. This made us to understand that in-vivo nitration might help *V.*  
248 *cholerae* cells to keep a reservoir of toxic nitrite in a “safe condition” for future use. This de-  
249 nitration phenomenon is synergistically associated with low GSH/GSSH of cell i.e. more

250 oxidative environment that is prevailed during long term anaerobic incubation, where released  
251 nitrite is oxidized and converted to nitrate which can be used during anaerobic respiration. Hence  
252 in-vivo nitration phenomenon is important for *V. cholerae* cell survival mostly in a condition  
253 where scarcity of exogenous nitrate is prevailing. From these facts, we propose that in a nitrate  
254 deprived anaerobic growth condition, in-vivo nitration and de-nitration is a cyclical phenomenon  
255 which is governed by controlled oxidative condition of cell and can perform as a sole source of  
256 respiration just to keep cells viable. Apart from this, in our previous studies we showed the role  
257 of S-nitrosoglutathione Reductase (GSNOR)<sup>21</sup> and Catalases (KatB & KatG)<sup>22</sup> in combating  
258 nitrosative stress mediated by GSNO and peroxynitrite respectively. Hence, in-vivo nitration  
259 might also be an advanced evolutionary adapted mechanism of nitrosative stress tolerance found  
260 in *V. cholerae*, as it restricts proteome to unnecessary PTN in nitroso-oxidative stress prevailing  
261 environment such as inside human gut.

262 Perhaps there are many possibilities of in-vivo nitration in other organisms, which face similar  
263 harsh environment as *Vibrio sp.*, or in those organisms which have alternate habitats consisting  
264 of aerobic and anaerobic environments. Even in our study we found lowered extent of nitration  
265 and higher intracellular nitrite content in stationary phase cells. This result might indicate the  
266 possible role of de-nitration as well as the role of *napA* in cell survival during nutrient deprived  
267 state.

268

269

270

271

## 272 **Methods**

### 273 **Strains and media used**

274 In this study *Vibrio cholerae* strain C6706 belonging to El Tor O1 serotype was used throughout  
275 all experiments. For growth purpose, LB media with 1% NaCl (pH 7.5) and M9 minimal media  
276 with 0.4% glucose (pH 7.5) were used. For proteomic analysis (LC-ESI-MS/MS) N16961  
277 belonging to El Tor O1 was used along with C6706.

### 278 **Aerobic and anaerobic growth conditions for nitration/de-nitration studies**

279 For aerobic growth conditions cells were grown in either LB or M9 minimal media with a  
280 starting O.D.600nm of 0.05 in shaking condition (140 rpm) at 37°C. The growth was monitored  
281 by checking the O.D.600nm at 1 hour to 2 hours interval.

282 To impart anaerobicity, cells were grown aerobically till late log phase, then, the whole culture  
283 media containing cells were transferred to closed screw capped tubes with negligible void  
284 volume (air) and grown for further 18 hours at 37°C in shaking condition to study stationary  
285 phase denitration.

### 286 **Preparation of Cell free extract (CFE) for immunoblotting and other assays**

287 Cells were collected by centrifugation at 5000g for 10 minutes followed by washing the cell  
288 pellet with PBS and recollecting it by centrifugation. Collected cells were resuspended and lysed  
289 with 20 mM Tris-HCl buffer of pH 7.5, containing 1 mM EDTA, 1 mM PMSF and 0.5 mg/ml  
290 lysozyme followed by incubation at 37°C for 10 minutes and finally by sonication. The CFE is  
291 finally collected by centrifugation of lysate at 10000g for 10 minutes. Protein concentrations of

292 respective CFE samples were checked spectrophotometrically by using Bradford reagent at  
293 595nm.

#### 294 **Detection of protein tyrosine nitration (PTN) by western blot analysis**

295 To detect nitration in whole proteome, equal and normalized amount of protein (30 $\mu$ g) samples  
296 were prepared without adding  $\beta$ -mercaptoethanol (BME) and were subjected for SDS-PAGE  
297 using 5% stacking and 10% resolving gel of 1.5 mm width. After the electrophoresis process,  
298 proteins within the gel were partially transferred to polyvinylidene difluoride (PVDF) membrane  
299 (250 mA current flow, 1.5 h) using wet transfer apparatus (Bio-Rad Laboratories Inc., Hercules,  
300 CA, USA). Blocking of the PVDF membranes were done for overnight at 4 $^{\circ}$ C temperature in  
301 shaking condition using blocking buffer (0.019 M Tris, 0.136 M NaCl, 0.1% v/v Tween 20 and  
302 5% w/v nonfat dry milk). Anti 3-nitrotyrosine primary antibodies at 1:2000 dilutions in tris-  
303 buffered saline with Tween 20 (TBST) (0.019 M Tris, 0.136 M NaCl, 0.1% v/v Tween 20) were  
304 used to probe the membranes at room temperature for 1.5 hour. The primary antibody probed  
305 membranes were washed three times in TBST for 10 min for each wash, and then re-probed with  
306 HRP-conjugated anti-mouse IgG antibody at 1:2000 dilutions for 1 h at room temperature. The  
307 membrane was then finally washed three times in TBST followed by three times in TBS (0.019  
308 M Tris, 0.136 M NaCl) (10 min for each wash). The immunopositive spots were visualized by  
309 using chemiluminescent reagent (Thermo Scientific Pierce, Rockford, IL, USA) as directed by  
310 manufacturer. The extent of relative nitration was measured by densitometric scanning of the  
311 immunopositive blot using ImageJ software.

#### 312 **Detection of protein tyrosine nitration and identification of nitrated proteins using LC-ESI-** 313 **MS/MS Proteomic analysis**

314 *Vibrio cholerae*, C6706 strain was used for proteomic analysis study. Cell lysates of mid log  
315 phase cells grown in LB media were prepared in the same way previously described in cell lysate  
316 preparation column. The cell lysates were first lyophilized and then dissolved in 50mM  
317 ammonium bicarbonate solution such a way that all protein samples would reach to same  
318 concentration (2 mg/ml protein). Crude cell lysates were then subjected to treatment by TFE  
319 followed by reduction by 5mM DTT for 1 hour at 60°C. Then alkylation of sample was done by  
320 5mM Iodoacetamide at room temperature for 45 minutes. After these, sample was subjected to  
321 overnight trypsin digestion. Trypsin digested samples were treated with 0.1% formic acid and  
322 subjected for Liquid chromatography (LC) followed by ESI-MS/MS detection and analysis in  
323 XEVO G2-XS QToF system (Waters). BEH C-18 column (Waters) was used in the instrument.  
324 Sodium formamide was used as primary standard and whereas, leucine encaphline was used as  
325 secondary standard. Ramp collision energy was set at 18 to 40 V. whereas; MS and MS/MS  
326 thresholds were set at 150 and 20 counts respectively. Only fresh cell lysates were used in this  
327 study to get the best possible quantitative results. Protein tyrosine modifications in peptides  
328 were determined by setting a parameter indicating with mass shift of +47Da<sup>23</sup>. The peptides  
329 detected by LC-MS/MS were matched with *Vibrio cholerae*, C6706 database downloaded from  
330 Uniprot in FASTA format. The software used for analysis was Progenesis Qip by Waters.

### 331 **Determination of intracellular nitrite (NO<sub>2</sub>) concentration**

332 Intracellular nitrite content was determined using Griess assay<sup>24</sup> in freshly prepared CFE.  
333 Briefly, CFE was incubated at room temperature in dark with 1% Sulfanilamide solution  
334 prepared in 5% phosphoric acid for 15 minutes followed by addition of equal volume of 0.1% N-  
335 (1-naphthyl) ethylenediamine dihydrochloride (NEDD) solution and incubation for 15 minutes in  
336 similar way. The resulting azo dye formation inside sample tubes was spectrophotometrically

337 measured at 540 nm against a substrate blank. The concentration of nitrite was determined from  
338 the O.D. value using a standard curve of nitrite made using same reagents and experimental  
339 setup.

#### 340 **Treatment of *V. cholerae* cells with NO<sub>3</sub> and NO<sub>2</sub>**

341 To see the pattern of protein nitration in *V. cholerae* in response to exposure of nitrate and nitrite,  
342 *V. cholerae* cells were grown and incubated aerobically in separate conical flasks with 1mM  
343 potassium Nitrate (KNO<sub>3</sub>) and 1 mM Sodium Nitrite (NaNO<sub>2</sub>) from lag phase to mid log phase  
344 in M9 minimal media along with an untreated control set. To observe cellular growth, culture  
345 O.D. was monitored spectrophotometrically at 600 nm in a 1-hour regular interval until the O.D  
346 reached around 0.8 starting from around 0.05. After that the cells were collected and subjected to  
347 prepare CFE for immunoblotting.

#### 348 **Determination of intracellular nitrate (NO<sub>3</sub>) concentration**

349 Intracellular nitrate content was measured by a multi-step process. In brief, at first cellular NO<sub>3</sub>  
350 was converted to NO<sub>2</sub> enzymatically using Nitrate Reductase (NR) enzyme followed by few  
351 steps, then the cellular nitrite was measured using Griess assay as mentioned earlier. To convert  
352 nitrates to nitrites freshly prepared CFE samples in phosphate buffer (pH 7.5) were incubated  
353 with 0.1 U/ml NR, 5μM FAD, 30μM NADPH for 30 minutes at 37°C. Then the sample was  
354 incubated again for 30 minutes at 37°C with 0.1 kU/ml Lactate dehydrogenase (LDH) and  
355 300μM Pyruvate to ensure full oxidation of NADPH to avoid any interference in Griess reaction.  
356 After these steps the samples were subjected to Griess assay and the nitrite content was  
357 measured. To measure the nitrate content, this experiment was done with two setups for each



358 sample. One of which is marked as NR blank and that was used to subtract the true nitrite  
359 content of samples.

### 360 **Total Glutathione (GSH+GSSG), Reduced Glutathione (GSH), and Oxidized Glutathione** 361 **(GSSG) Content Measurement**

362 These parameters were measured according to the method described by Akerboom et al.<sup>25</sup>. In  
363 brief, freshly prepared, crude cell free extract was added to equal volume of 2M HClO<sub>4</sub>  
364 containing, 2mM EDTA and incubated on ice for 10 min. The mixture was centrifuged at  
365 5000×g for 5 min. Resulting supernatant was neutralized with 2M KOH containing 0.3M  
366 HEPES. After centrifugation at 5000×g for 5 min, the neutralized supernatant was used for  
367 estimation of the above-mentioned parameters. Total glutathione was estimated following  
368 Glutathione Reductase (GR)-dependent DTNB reduction assay spectrophotometrically  
369 measuring 5-thio-2-nitrobenzoate (TNB) formation at 412 nm. The reaction mixture contained  
370 100mM K-phosphate, pH 7.0, 0.2mM NADPH, 0.12 U GR, 1mM EDTA, 0.063mM DTNB and  
371 sample in a total volume of 500µl. Same neutralized extract was treated with 2-vinylpyridine  
372 (50:1, v/v) for 1 h at room temperature. Then, it was used for GSSG estimation using the above  
373 method. Reduced Glutathione content was determined from the difference between the total and  
374 oxidized glutathione content of the sample.

### 375 **Statistical analysis**

376 All results of biochemical assay were expressed as mean ± SD, for n=3. The statistical evaluation  
377 was performed with either one way or with two-way ANOVA followed by two tailed paired  
378 Student's t-test; p value ≤ 0.05 or 0.01 was considered significant.

379

380 **References**

- 381 1 Bottari, S. P. Protein tyrosine nitration: a signaling mechanism conserved from yeast to  
382 man. *Proteomics* 15, 185-187 (2015).
- 383 2 Radi, R. Nitric oxide, oxidants, and protein tyrosine nitration. *Proceedings of the*  
384 *National Academy of Sciences of the United States of America* 101, 4003-4008 (2004).
- 385 3 Lee, J. R., Kim, J. K., Lee, S. J. & Kim, K. P. Role of protein tyrosine nitration in  
386 neurodegenerative diseases and atherosclerosis. *Archives of pharmacal research* 32,  
387 1109-1118 (2009).
- 388 4 Peluffo, G. & Radi, R. Biochemistry of protein tyrosine nitration in cardiovascular  
389 pathology. *Cardiovascular research* 75, 291-302 (2007).
- 390 5 Zhan, X., Huang, Y. & Qian, S. Protein Tyrosine Nitration in Lung Cancer: Current  
391 Research Status and Future Perspectives. *Current medicinal chemistry* 25, 3435-3454  
392 (2018).
- 393 6 Yeo, W. S. *et al.* Mass spectrometric analysis of protein tyrosine nitration in aging and  
394 neurodegenerative diseases. *Mass spectrometry reviews* 34, 166-183 (2015).
- 395 7 Radi, R. Protein tyrosine nitration: biochemical mechanisms and structural basis of  
396 functional effects. *Accounts of chemical research* 46, 550-559 (2013).
- 397 8 Kettle, A. J., van Dalen, C. J. & Winterbourn, C. C. Peroxynitrite and myeloperoxidase  
398 leave the same footprint in protein nitration. *Redox report : communications in free*  
399 *radical research* 3, 257-258 (1997).
- 400 9 Batthyany, C. *et al.* Tyrosine-Nitrated Proteins: Proteomic and Bioanalytical Aspects.  
401 *Antioxidants & redox signaling* 26, 313-328 (2017).
- 402 10 Sahoo, R. *et al.* Effect of nitrosative stress on *Schizosaccharomyces pombe*: inactivation  
403 of glutathione reductase by peroxynitrite. *Free radical biology & medicine* 40, 625-631  
404 (2006).
- 405 11 Bhattacharjee, A. *et al.* In vivo protein tyrosine nitration in *S. cerevisiae*: identification of  
406 tyrosine-nitrated proteins in mitochondria. *Biochemical and biophysical research*  
407 *communications* 388, 612-617 (2009).
- 408 12 Panja, C. & Ghosh, S. Detection of in vivo protein tyrosine nitration in petite mutant of  
409 *Saccharomyces cerevisiae*: consequence of its formation and significance. *Biochemical*  
410 *and biophysical research communications* 451, 529-534 (2014).
- 411 13 Rabbani, G. H. *et al.* Increased nitrite and nitrate concentrations in sera and urine of  
412 patients with cholera or shigellosis. *The American journal of gastroenterology* 96, 467-  
413 472 (2001).
- 414 14 Poole, K. Stress responses as determinants of antimicrobial resistance in Gram-negative  
415 bacteria. *Trends in microbiology* 20, 227-234 (2012).
- 416 15 Knowles, M. E., McWeeny, D. J., Couchman, L. & Thorogood, M. Interaction of nitrite  
417 with proteins at gastric pH. *Nature* 247, 288-289 (1974).
- 418 16 Cole, J. A. & Richardson, D. J. Respiration of Nitrate and Nitrite. *EcoSal Plus* 3 (2008).
- 419 17 Bueno, E., Pinedo, V. & Cava, F. Adaptation of *Vibrio cholerae* to Hypoxic  
420 Environments. *Frontiers in microbiology* 11, 739 (2020).
- 421 18 Bueno, E., Sit, B., Waldor, M. K. & Cava, F. Anaerobic nitrate reduction divergently  
422 governs population expansion of the enteropathogen *Vibrio cholerae*. *Nature*  
423 *microbiology* 3, 1346-1353 (2018).

- 424 19 Kaper, J. B., Morris, J. G., Jr. & Levine, M. M. Cholera. *Clinical microbiology reviews* 8,  
425 48-86 (1995).
- 426 20 Braun, M. & Thony-Meyer, L. Cytochrome c maturation and the physiological role of c-  
427 type cytochromes in *Vibrio cholerae*. *Journal of bacteriology* 187, 5996-6004 (2005).
- 428 21 Patra, S. K., Bag, P. K. & Ghosh, S. Nitrosative Stress Response in *Vibrio cholerae*: Role  
429 of S-Nitrosoglutathione Reductase. *Applied biochemistry and biotechnology* 182, 871-  
430 884 (2017).
- 431 22 Patra, S. K., Samaddar, S., Sinha, N. & Ghosh, S. Reactive nitrogen species induced  
432 catalases promote a novel nitrosative stress tolerance mechanism in *Vibrio cholerae*.  
433 *Nitric oxide : biology and chemistry* 88, 35-44 (2019).
- 434 23 Liu, B. *et al.* Proteomic analysis of protein tyrosine nitration after ischemia reperfusion  
435 injury: mitochondria as the major target. *Biochimica et biophysica acta* 1794, 476-485  
436 (2009).
- 437 24 Sarkar, T. S., Biswas, P., Ghosh, S. K. & Ghosh, S. Nitric oxide production by  
438 necrotrophic pathogen *Macrophomina phaseolina* and the host plant in charcoal rot  
439 disease of jute: complexity of the interplay between necrotroph-host plant interactions.  
440 *PLoS one* 9, e107348 (2014).
- 441 25 Akerboom, T. P. & Sies, H. Assay of glutathione, glutathione disulfide, and glutathione  
442 mixed disulfides in biological samples. *Methods in enzymology* 77, 373-382 (1981).

443

#### 444 **Acknowledgements**

445 The authors would like to acknowledge Prof. Jun Zhu, Department of Microbiology, Nanjing  
446 Agricultural University, Nanjing, Jiangsu, China and Dr. Rupak Kumar Bhadra, Scientist, IICB,  
447 Jadavpur, Kolkata, India for providing *V. cholerae* strains used in this study. The authors also  
448 thank the Director, Bose Institute, Kolkata for providing the Proteomics Facility. The authors  
449 also thank Mr. Souvik Roy, Proteomics Facility, Bose Institute, Kolkata for his excellent  
450 technical support.

#### 451 **Author contributions**

452 S.K.P. and S.G. designed the experiments. S.K.P., N.S., S.C., A.S. and S.R. designed the data  
453 collection process and data collection. S.K.P., N.S. and S.R. performed the proteomic analysis.  
454 S.K.P., S.C., A.S. and performed the western blot analysis. S.K.P. performed the experiments  
455 related to cell growth, nitrate, nitrite measurement and GSH, GSSG estimation. S.K.P. and S.G.

456 analyzed the data. S.K.P. wrote the first draft of the manuscript. S.G. contributed to checking and  
457 revising the manuscript.

## 458 **Competing interests**

459 The authors declare no competing interest.

460 **Fig. 1 In-vivo growth phase specific Nitration profile of *V. cholerae* (C6706) cell grown in**  
461 **LB media.** Lysates from different growth phases of *V. cholerae* cells grown in LB media were  
462 subjected to immunoblotting using anti 3-nitrotyrosine monoclonal antibody. (A) Western Blot,  
463 (B) partially transferred commasie stained gel as loading control and (C) Densitometric analysis  
464 of nitration profile from blot.

465 **Fig. 2 In-vivo growth phase specific Nitration profile of *V. cholerae* (C6706) cell grown in**  
466 **M9 minimal media.** Lysates from different growth phases of *V. cholerae* cells grown in M9  
467 media were subjected to immunoblotting using anti 3-nitrotyrosine monoclonal antibody. (A)  
468 Western Blot, (B) partially transferred commasie stained gel as loading control and (C)  
469 Densitometric analysis of nitration profile from blot.

470 **Fig. 3 Results of proteomic analysis of *V. cholerae* proteome.** (A) Chromatogram of LC-ESI-  
471 MS/MS proteomic analysis for the identification of nitrated proteins in *Vibrio cholerae* strain  
472 C6706 (B) Pathway specific distribution of identified nitrated proteins of both C6706 and  
473 N16961 strains.

474 **Fig. 4 Intracellular Nitrite content of *V. cholerae* cells taken from different growth phase.**  
475 When, grown in (A) LB media and (B) M9 minimal media. Nitrite content is expressed as  
476 concentrations in the terms of nmoles/ $\mu$ g proteins unit. This data is represented as mean  $\pm$  SD (n  
477 = 3).

478 **Fig. 5 Nitration profile of *V. cholerae* proteome after treatment with 1 mM nitrate and 1**  
479 **mM nitrite.** *V. cholerae* was grown for 2 hours in M9 minimal media in the presence of 1 mM  
480 nitrate and 1mM nitrite during early log phase growth and the nitration profile was checked. (A)  
481 Western blot, (B) partially transferred commasie stained gel as loading control and (C)  
482 Densitometric analysis of nitration profile from blot.

483 **Fig. 6 In-vivo nitration profile of anaerobically incubated *V. cholerae* proteome.**  
484 Aerobically grown late log phase *V. cholerae* cells were subjected to anaerobic incubation for 18  
485 hours at 37°C under shaking condition along with its aerobic control set in M9 minimal media.  
486 (A) Western blot, (B) partially transferred commasie stained gel as loading control and (C)  
487 Densitometric analysis of nitration profile from blot.

488 **Fig. 7 Determination of intracellular nitrite and nitrate content of anaerobically incubated**  
489 ***V. cholerae* cells.** *V. cholerae* cells were incubated for 18 hours anaerobically in shaking  
490 condition at 37°C in M9 minimal media. (A) Intracellular nitrite and (B) intracellular nitrate  
491 content were measured in aerobically and anaerobically incubated late log phase cells. Nitrite  
492 and nitrate content is expressed as concentration with nmoles/ $\mu$ g protein unit. This data is  
493 represented as mean  $\pm$  SD (n = 3). \*\*p < 0.01.

494 **Fig. 8 Determination of cellular redox status of *V. cholerae* incubated under aerobic and**  
495 **anaerobic condition.** Cellular redox status was assessed in aerobically and anaerobically  
496 incubated late log phase *V. cholerae* cells which were grown for 18 hours in shaking condition at  
497 37°C in M9 minimal media. Redox status represents the reduced glutathione (GSH)  
498 concentration, oxidized glutathione (GSSG) concentration and GSH/GSSG ratio. Where, GSH  
499 and GSSG concentrations are expressed in nmoles/mg protein unit. This data is represented as  
500 mean  $\pm$  SD (n = 3). \*\*\*p < 0.001, \*\*\*\*p < .0001.

501

502

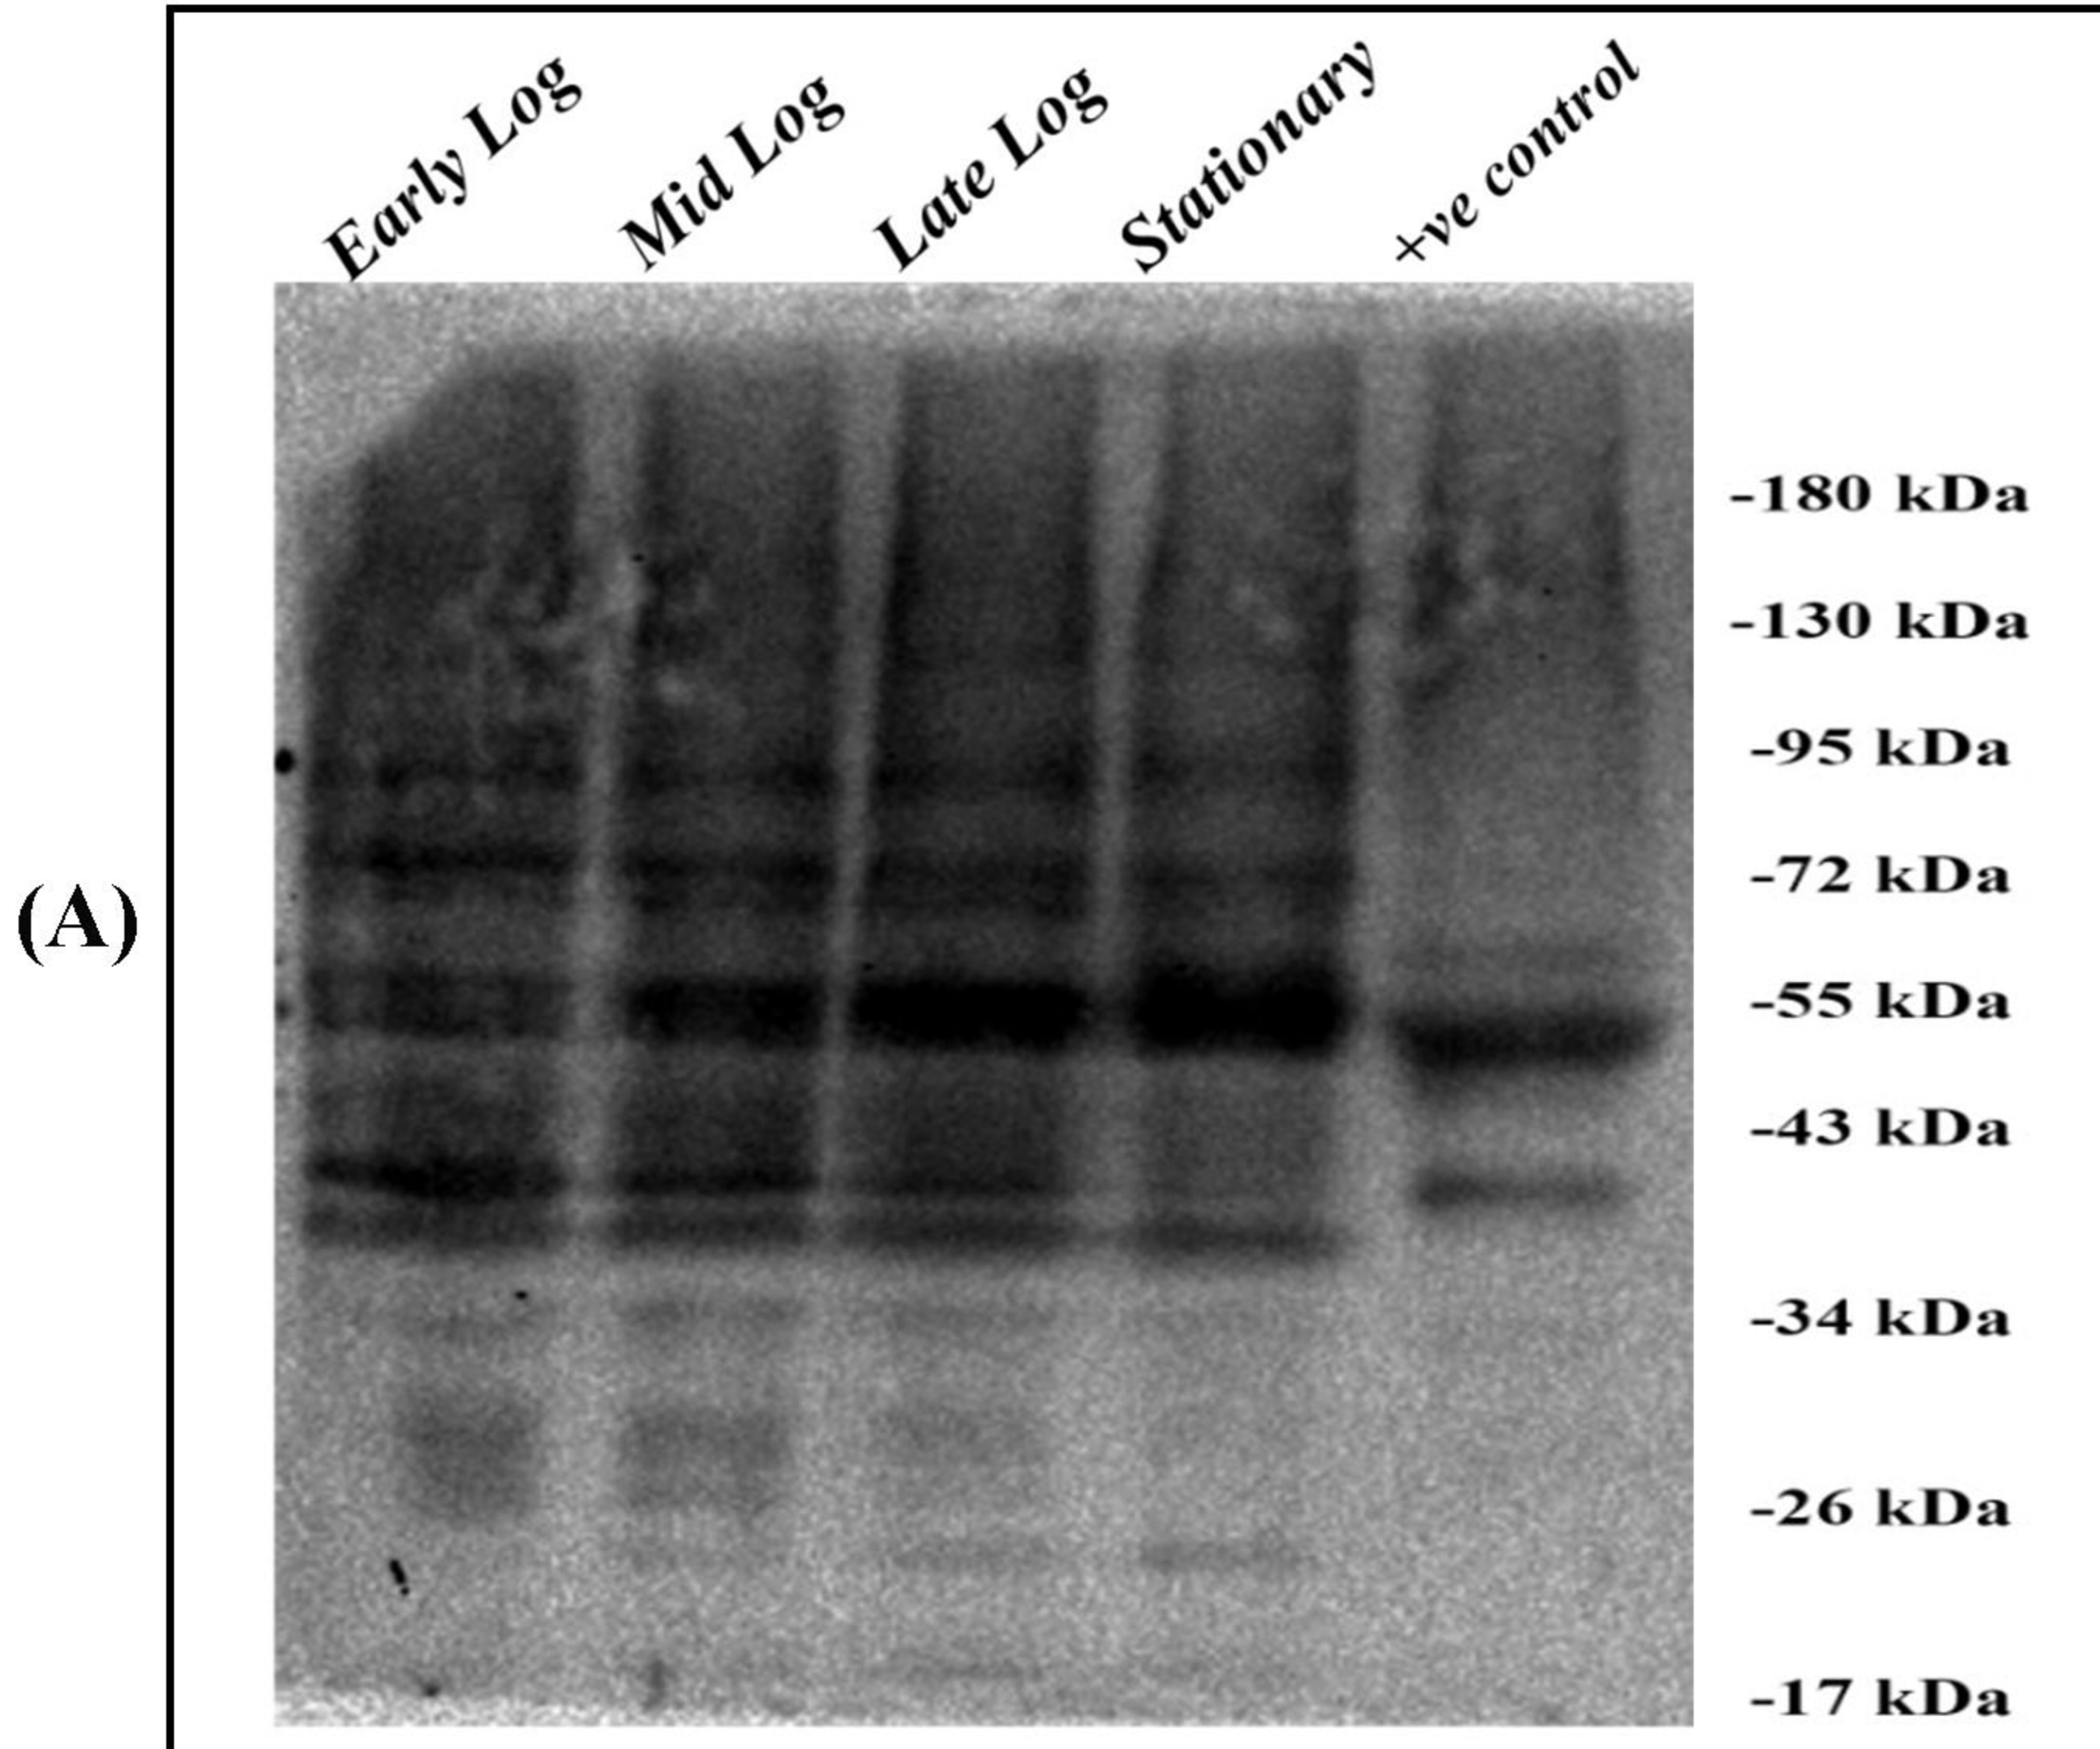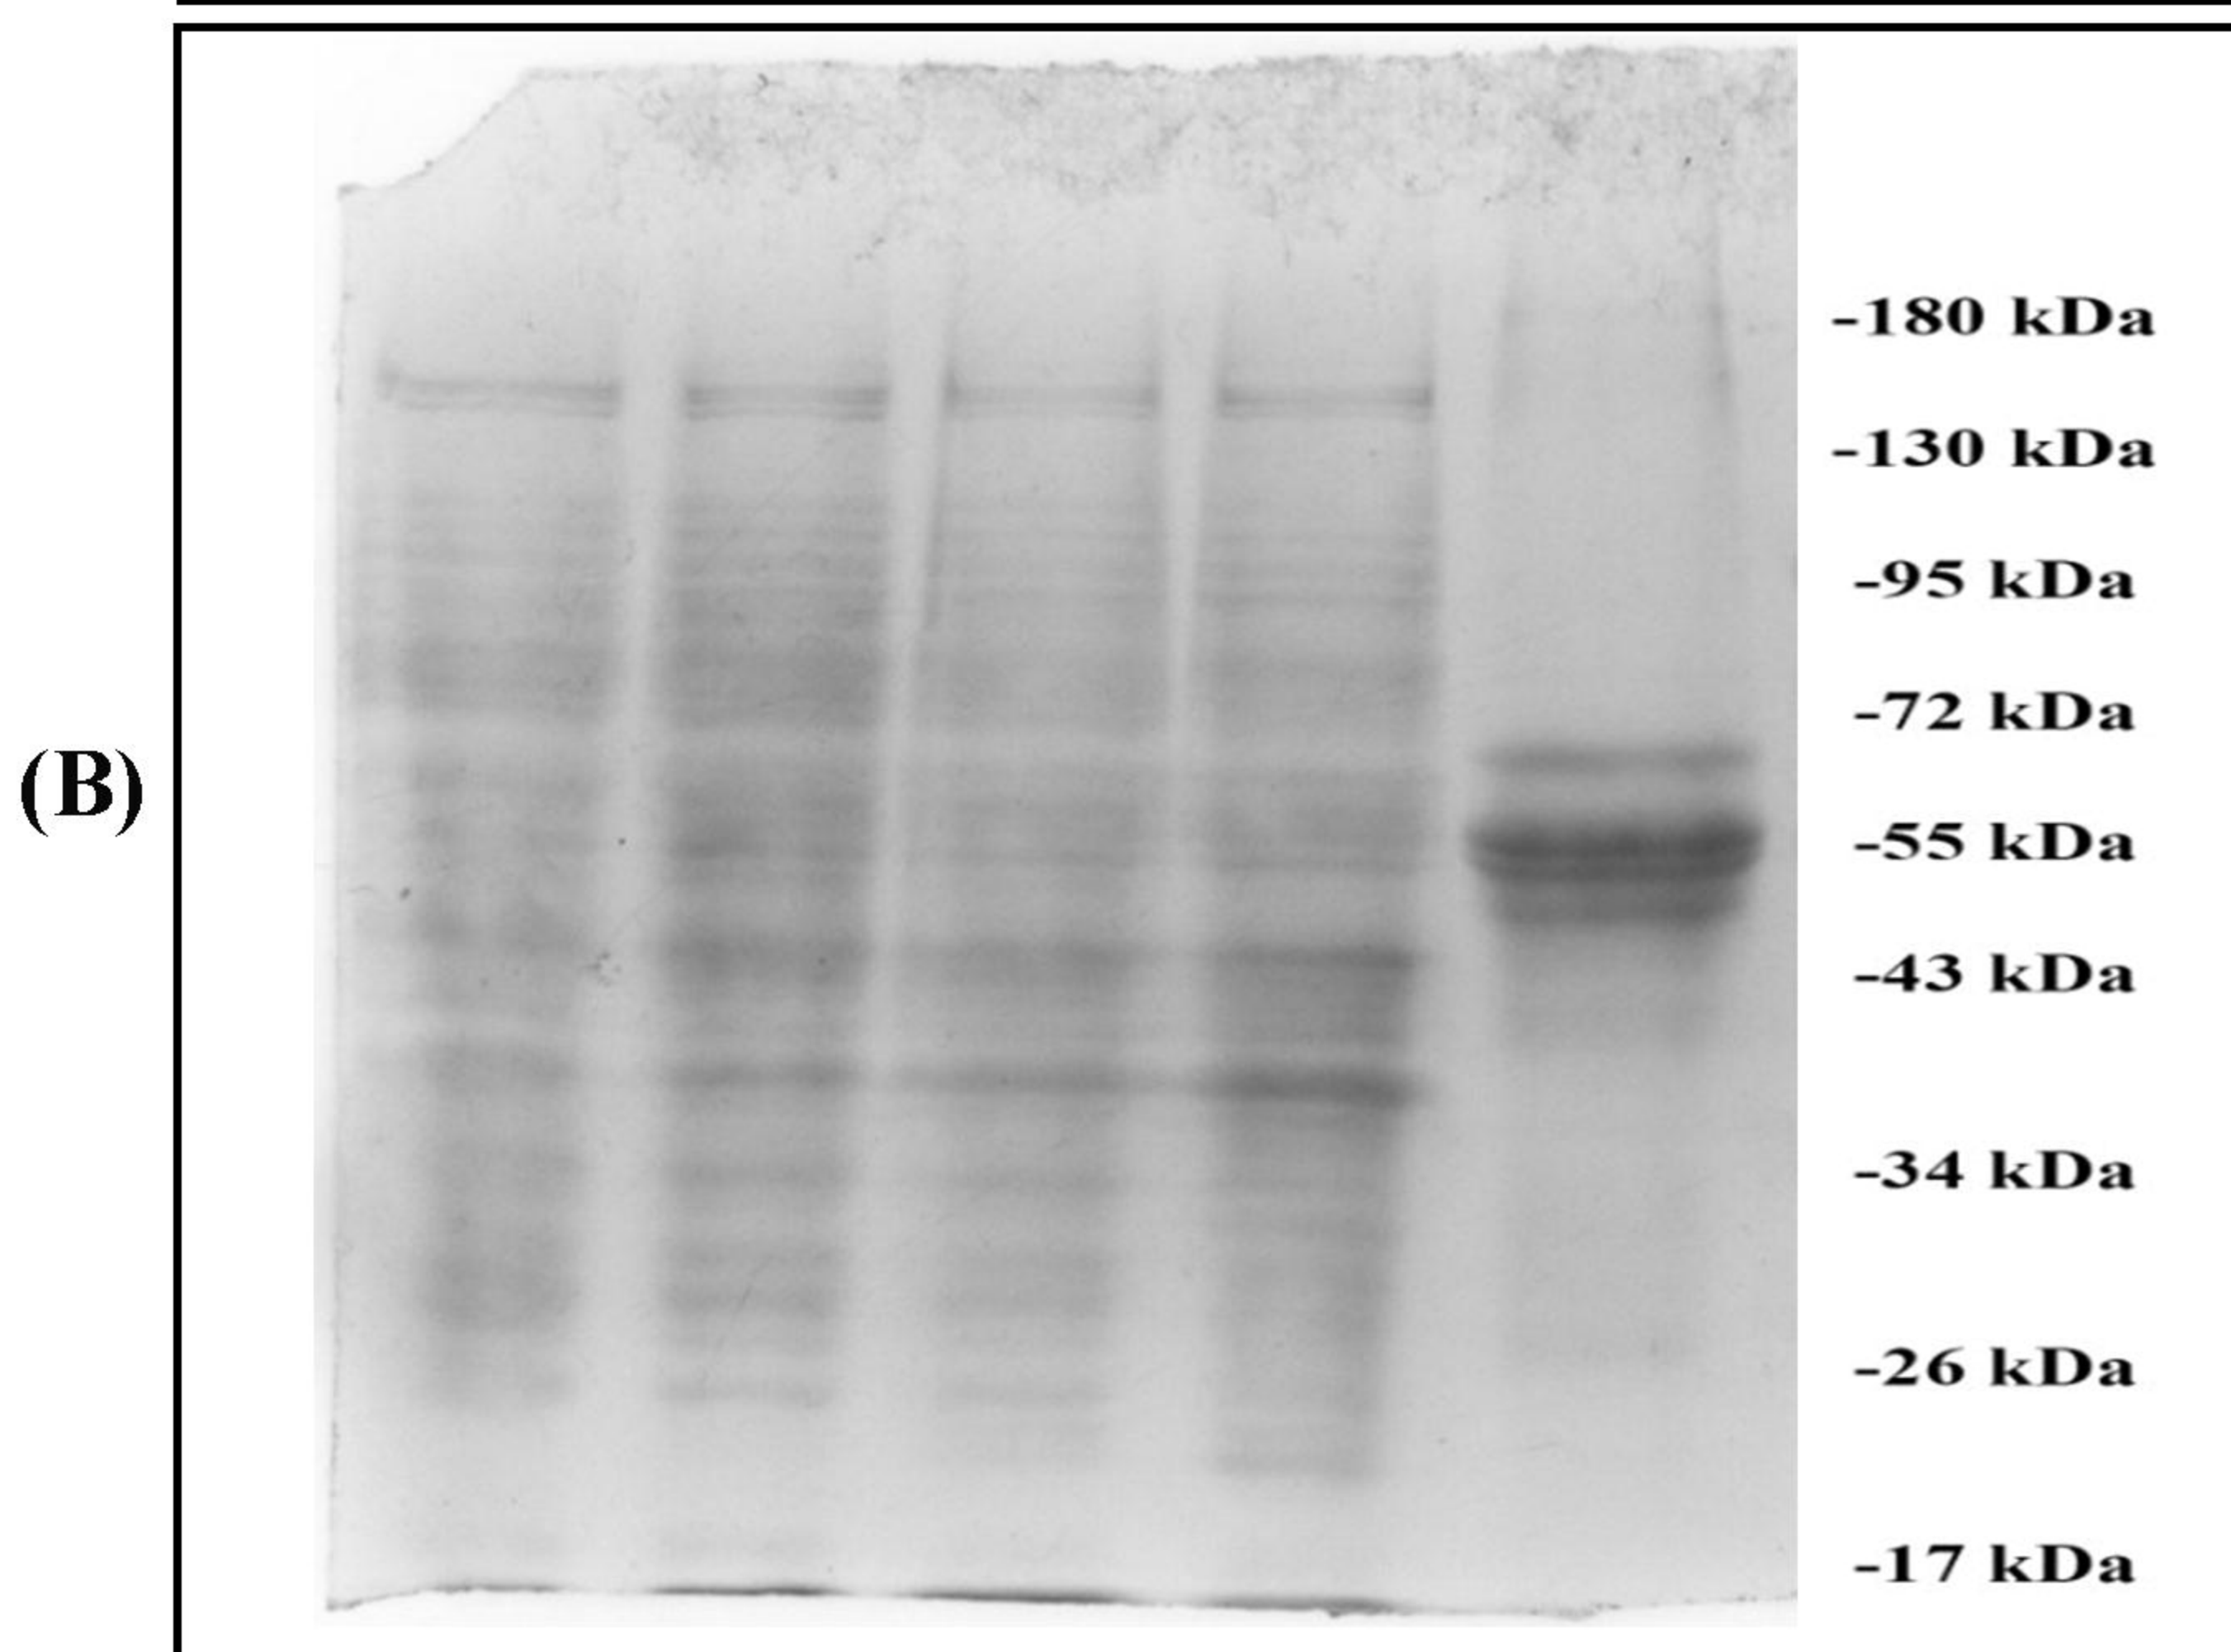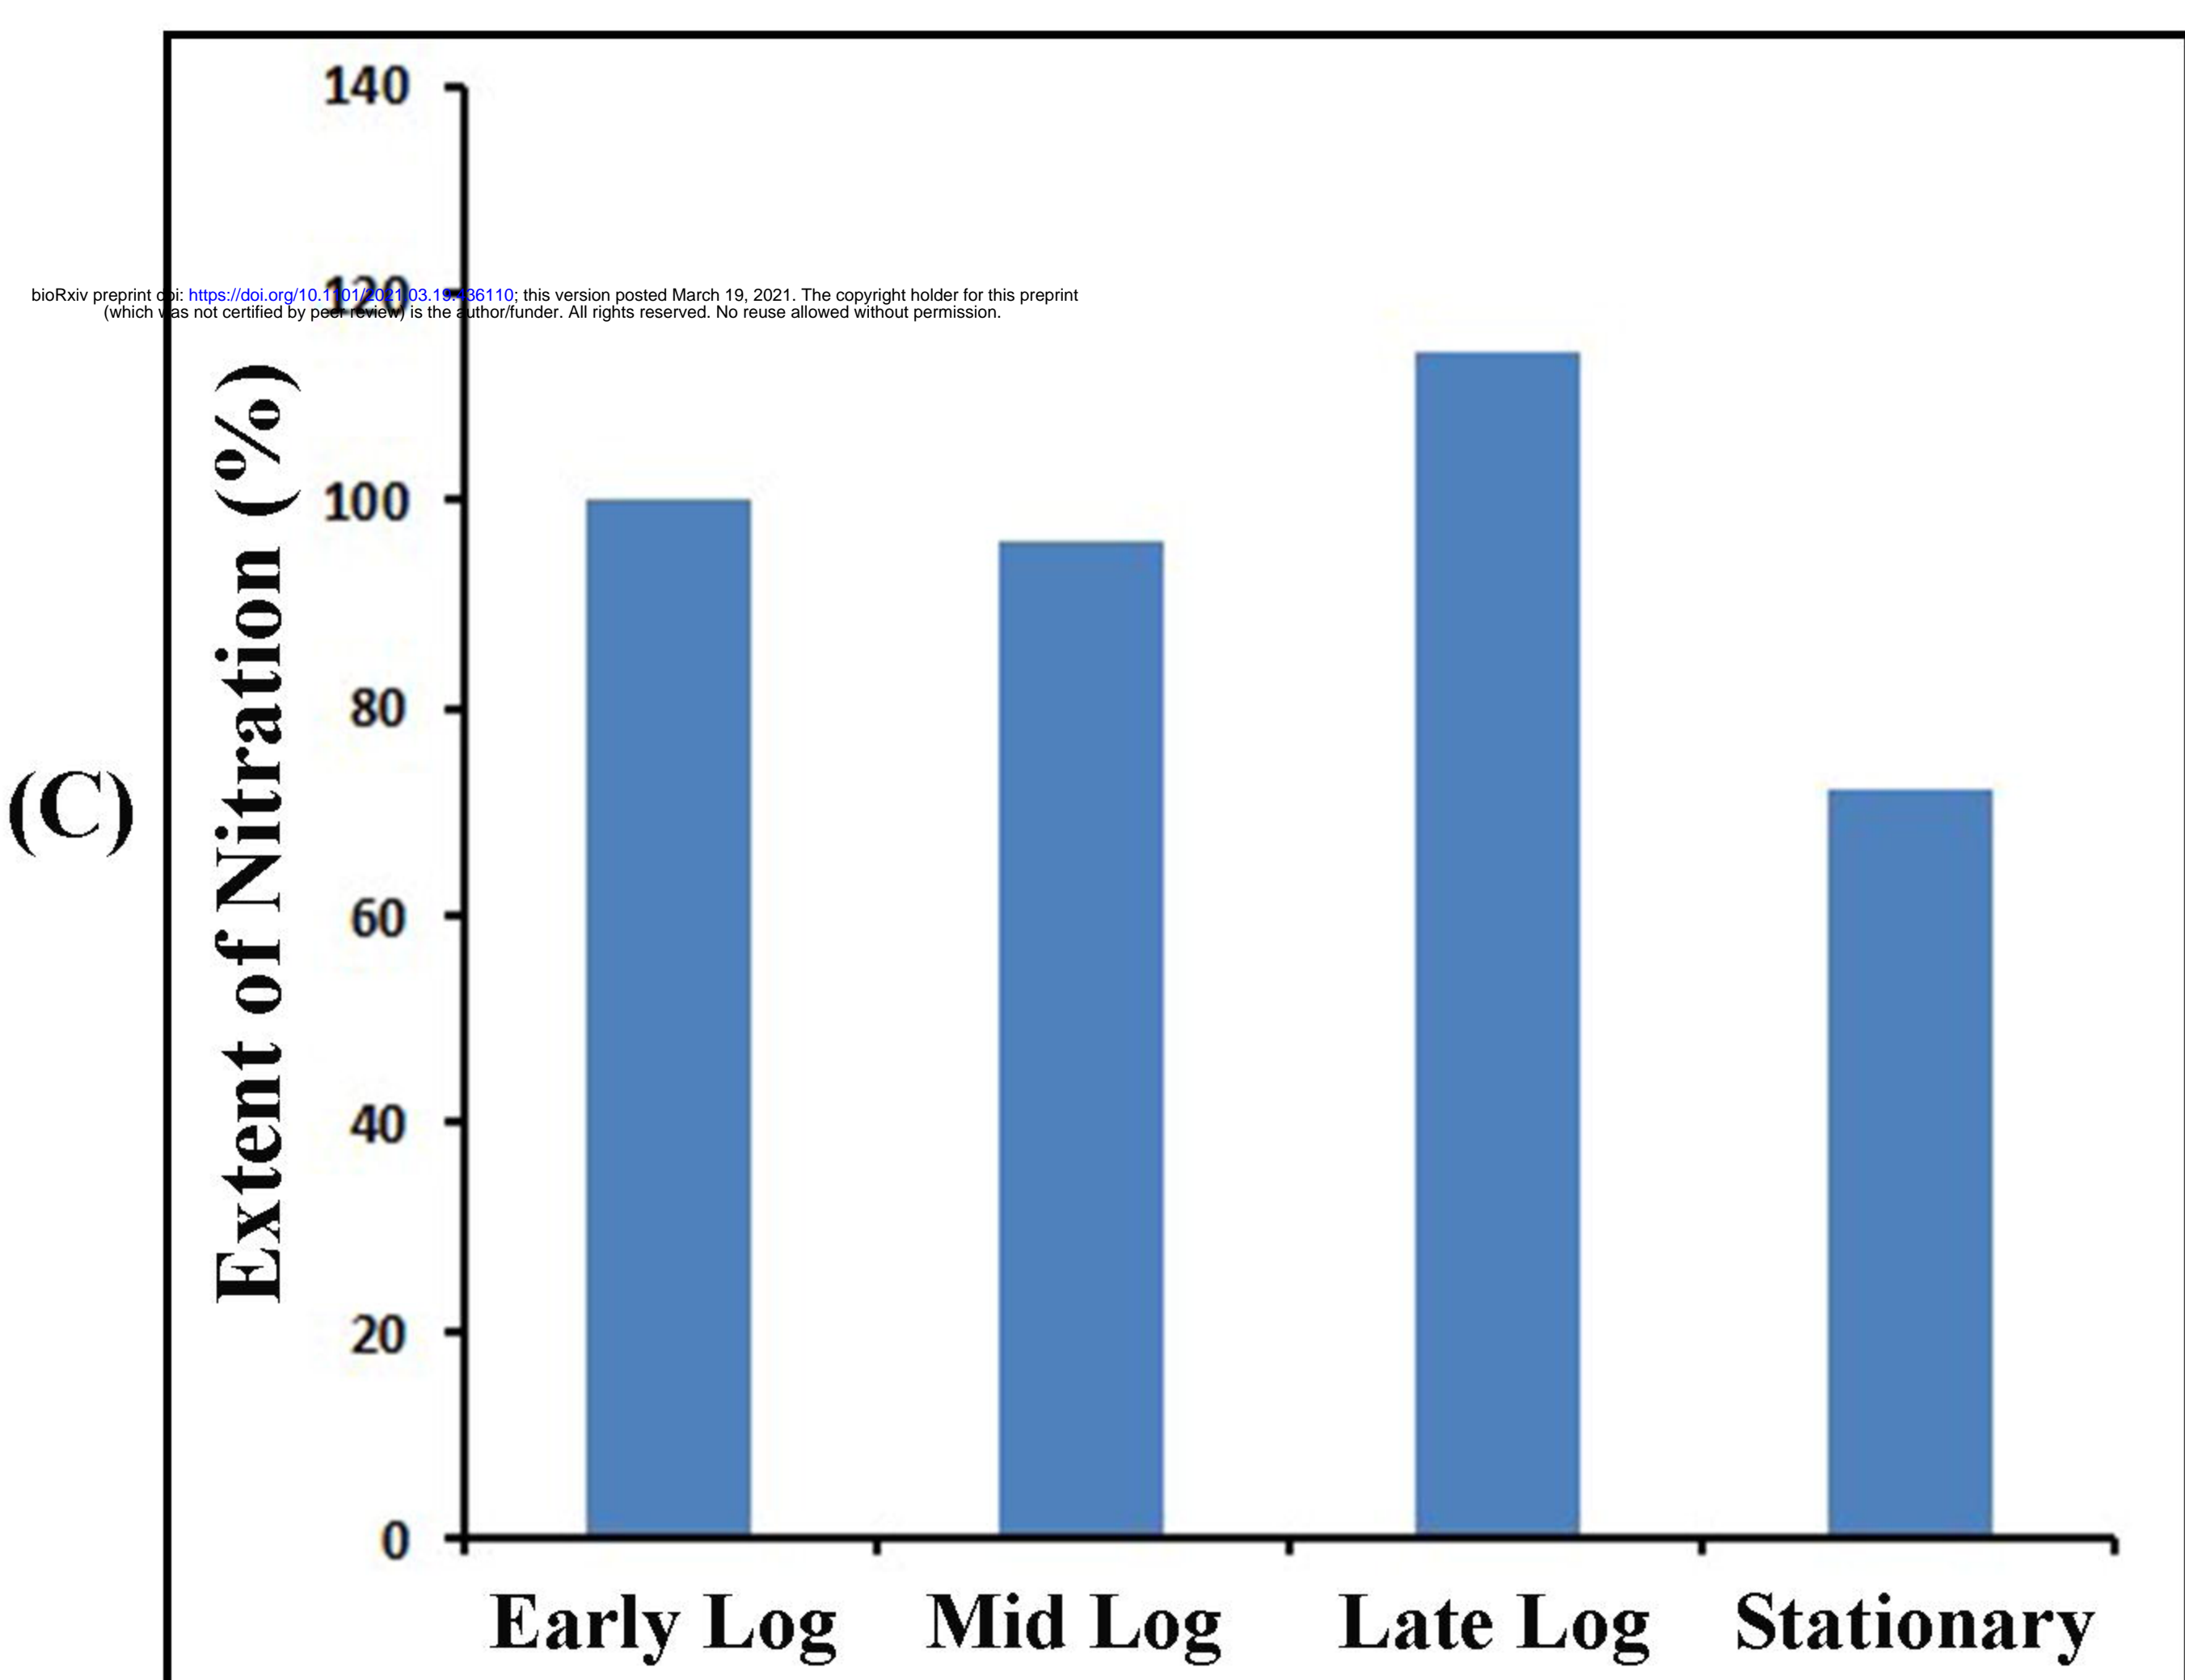

Figure 1

(A)

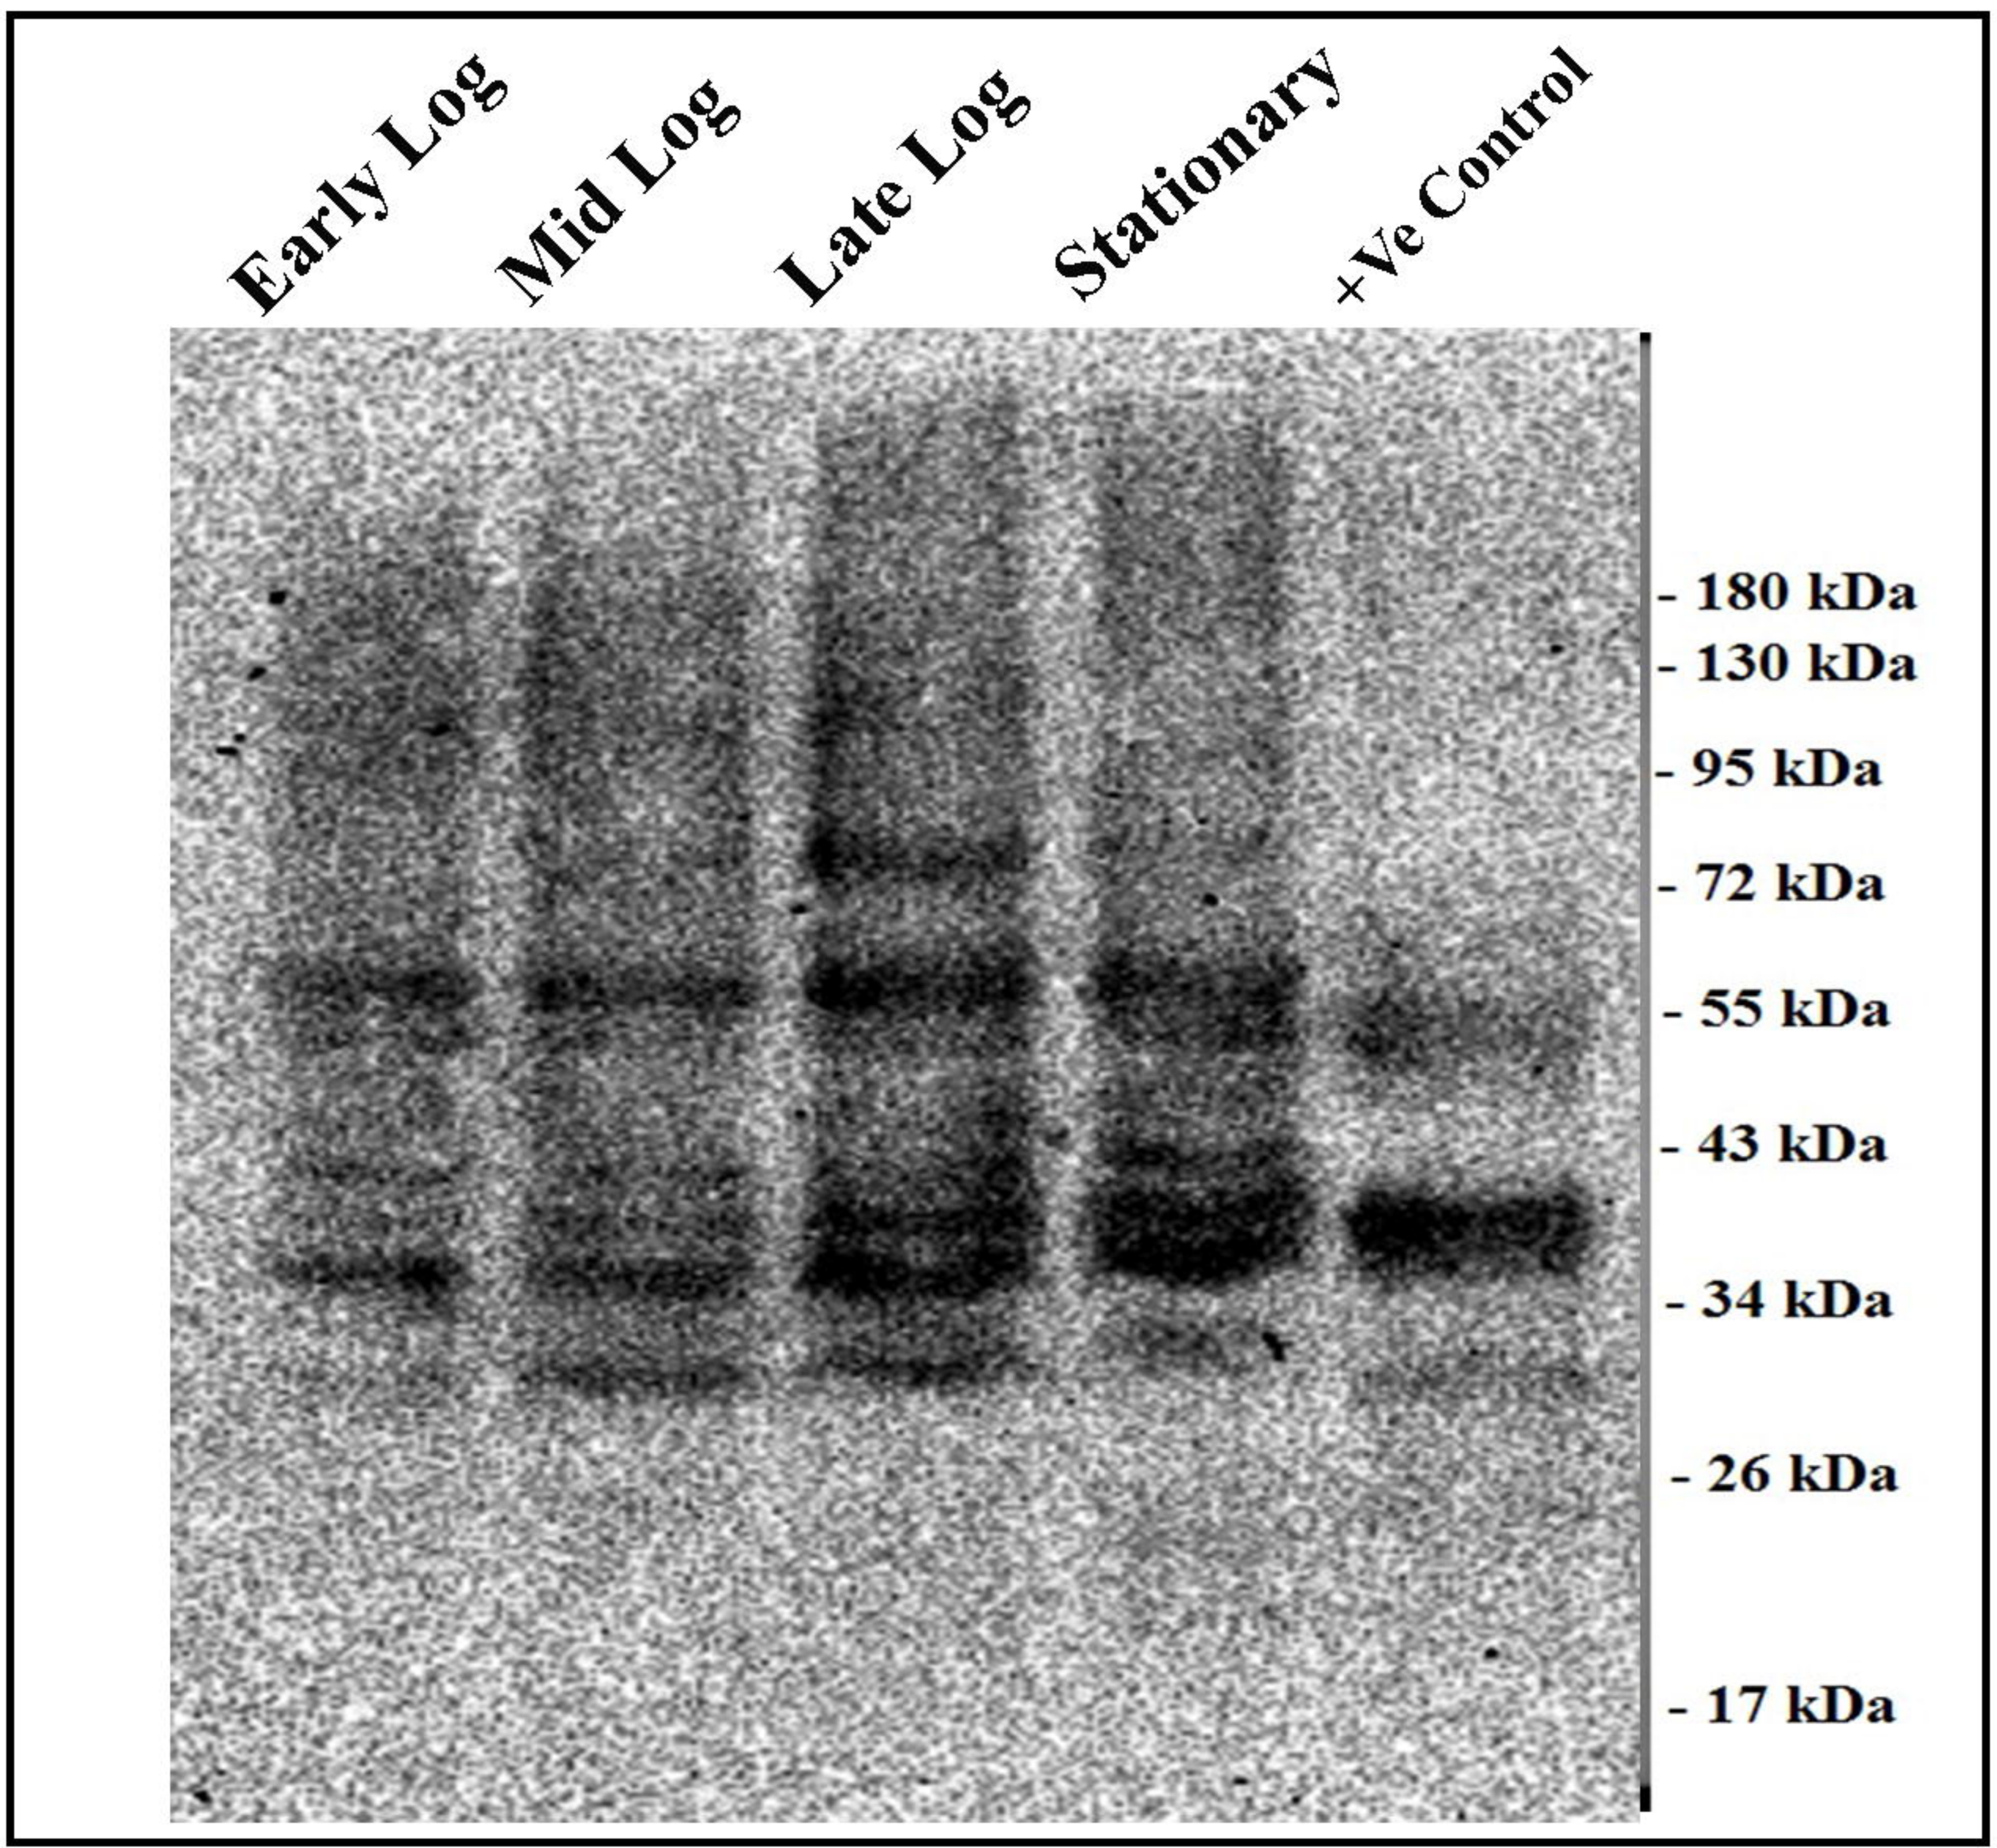

(B)

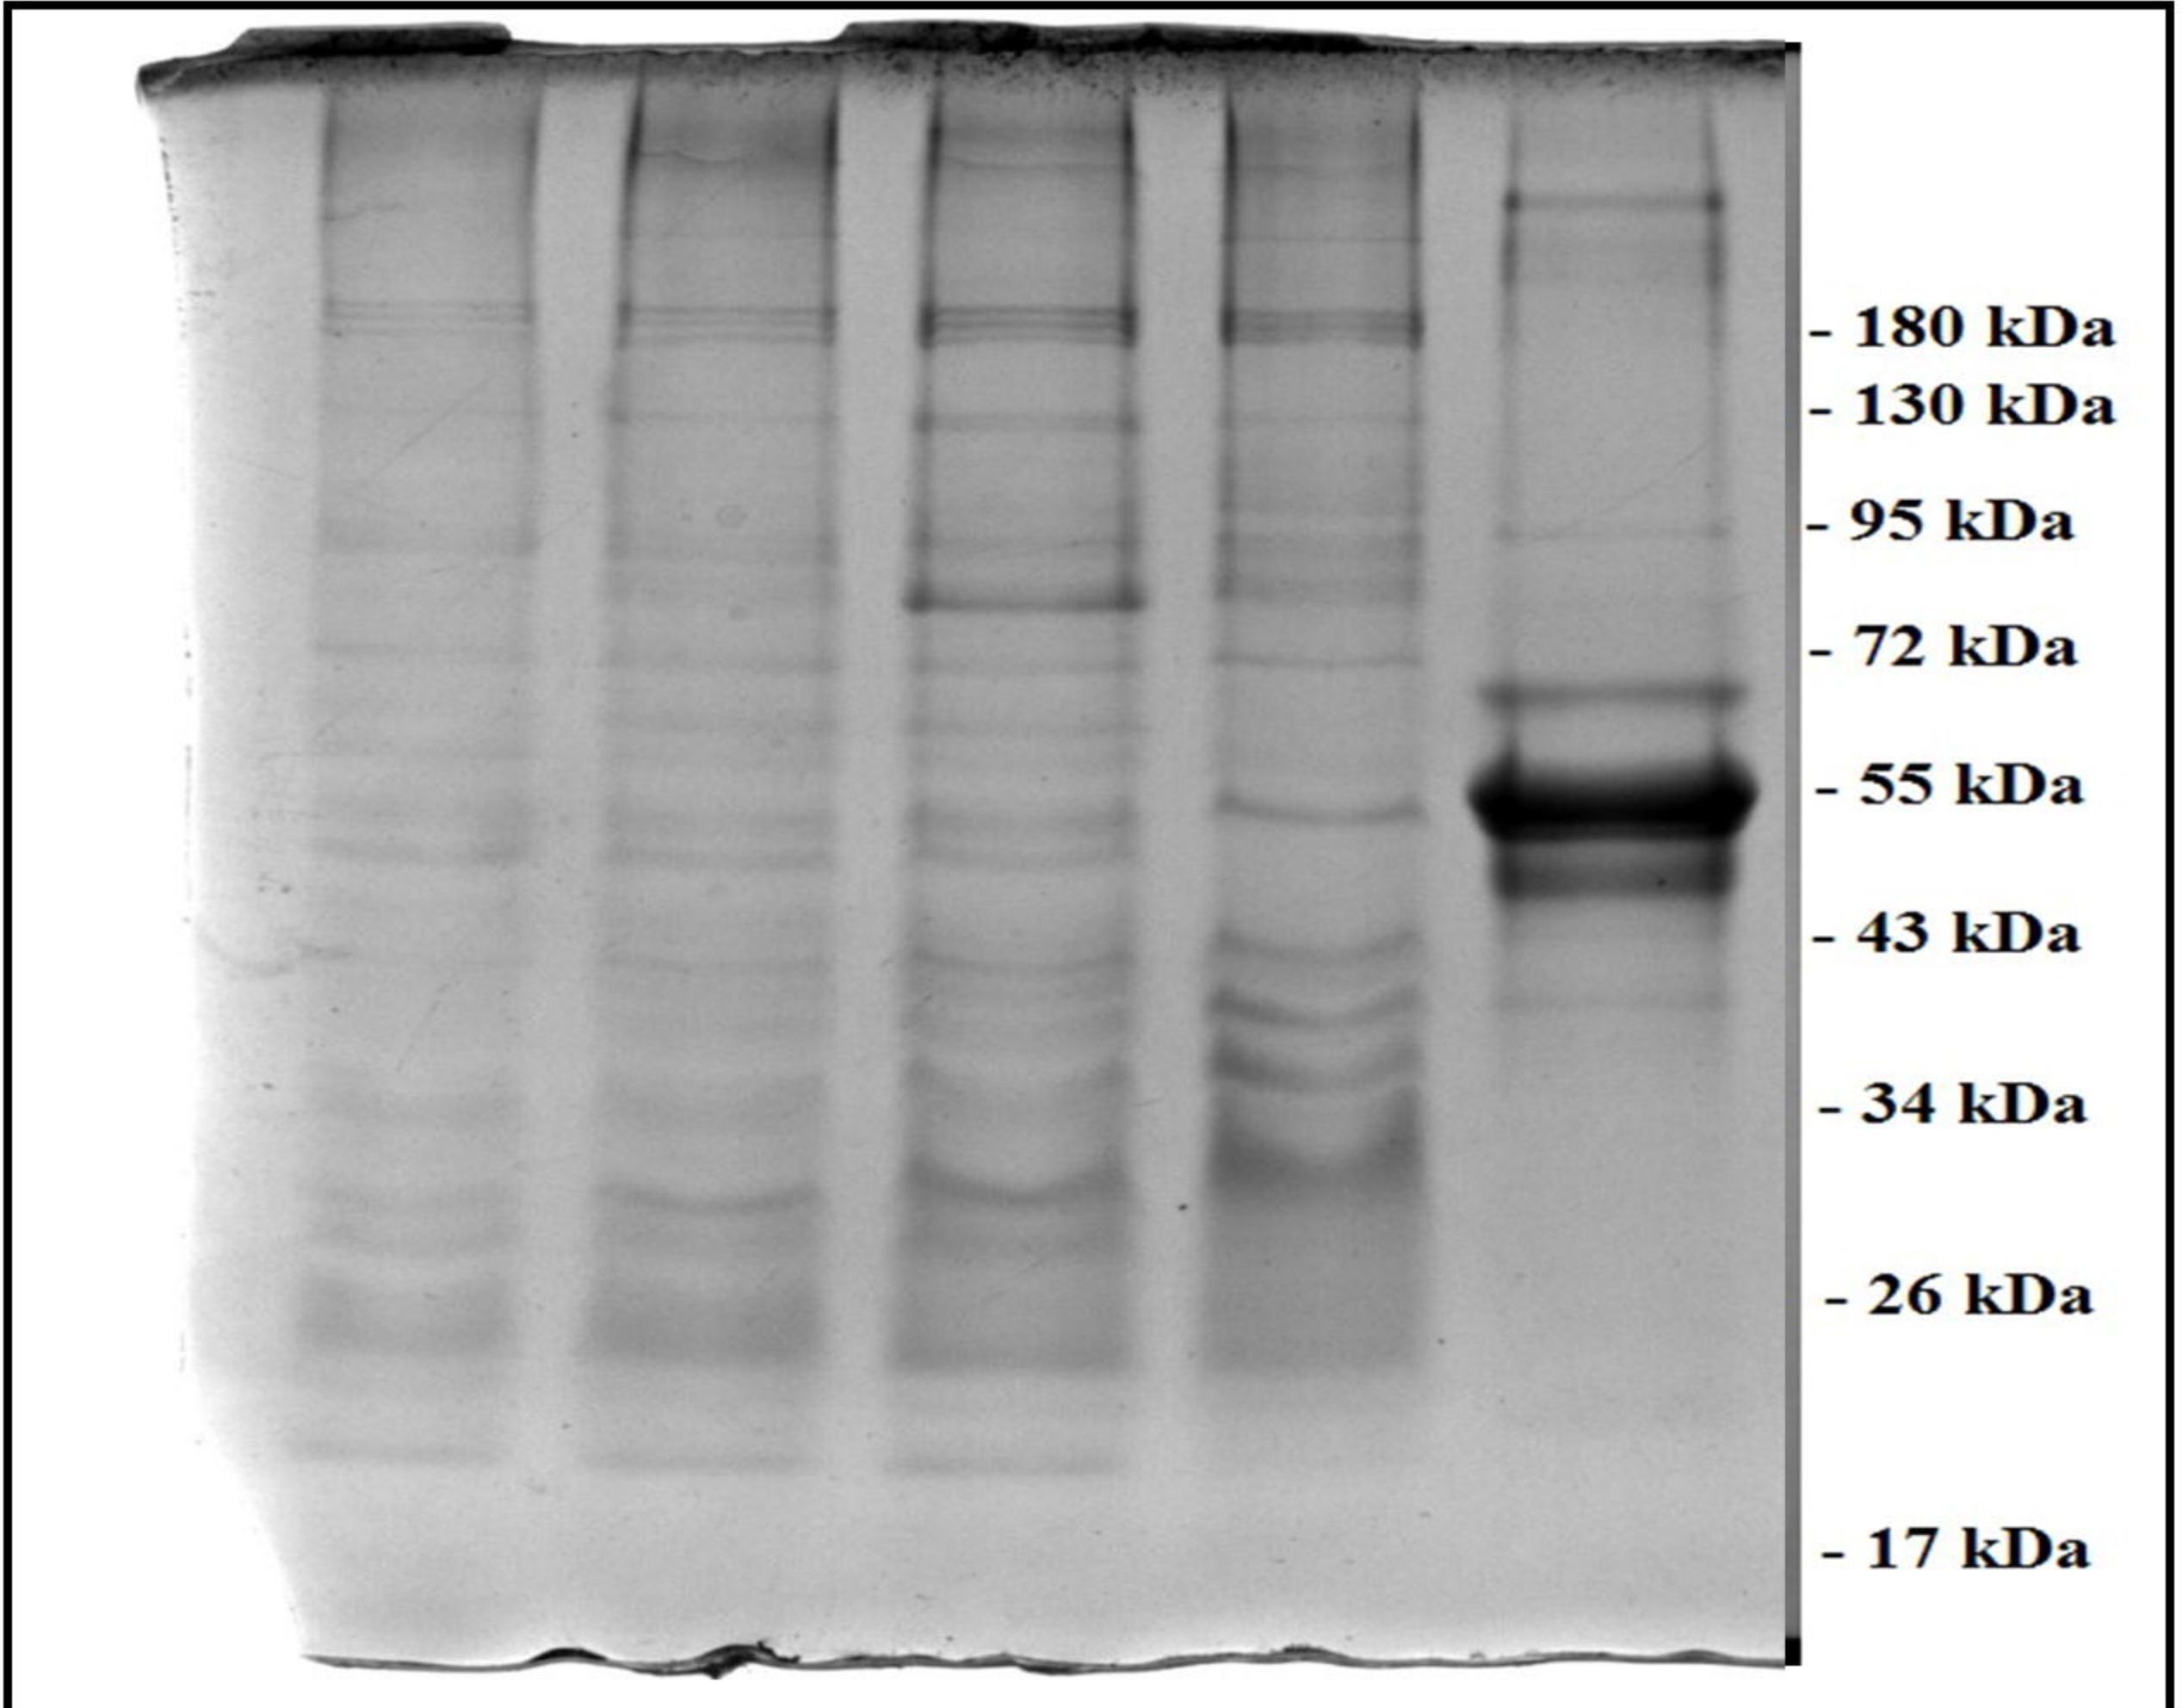

(C)

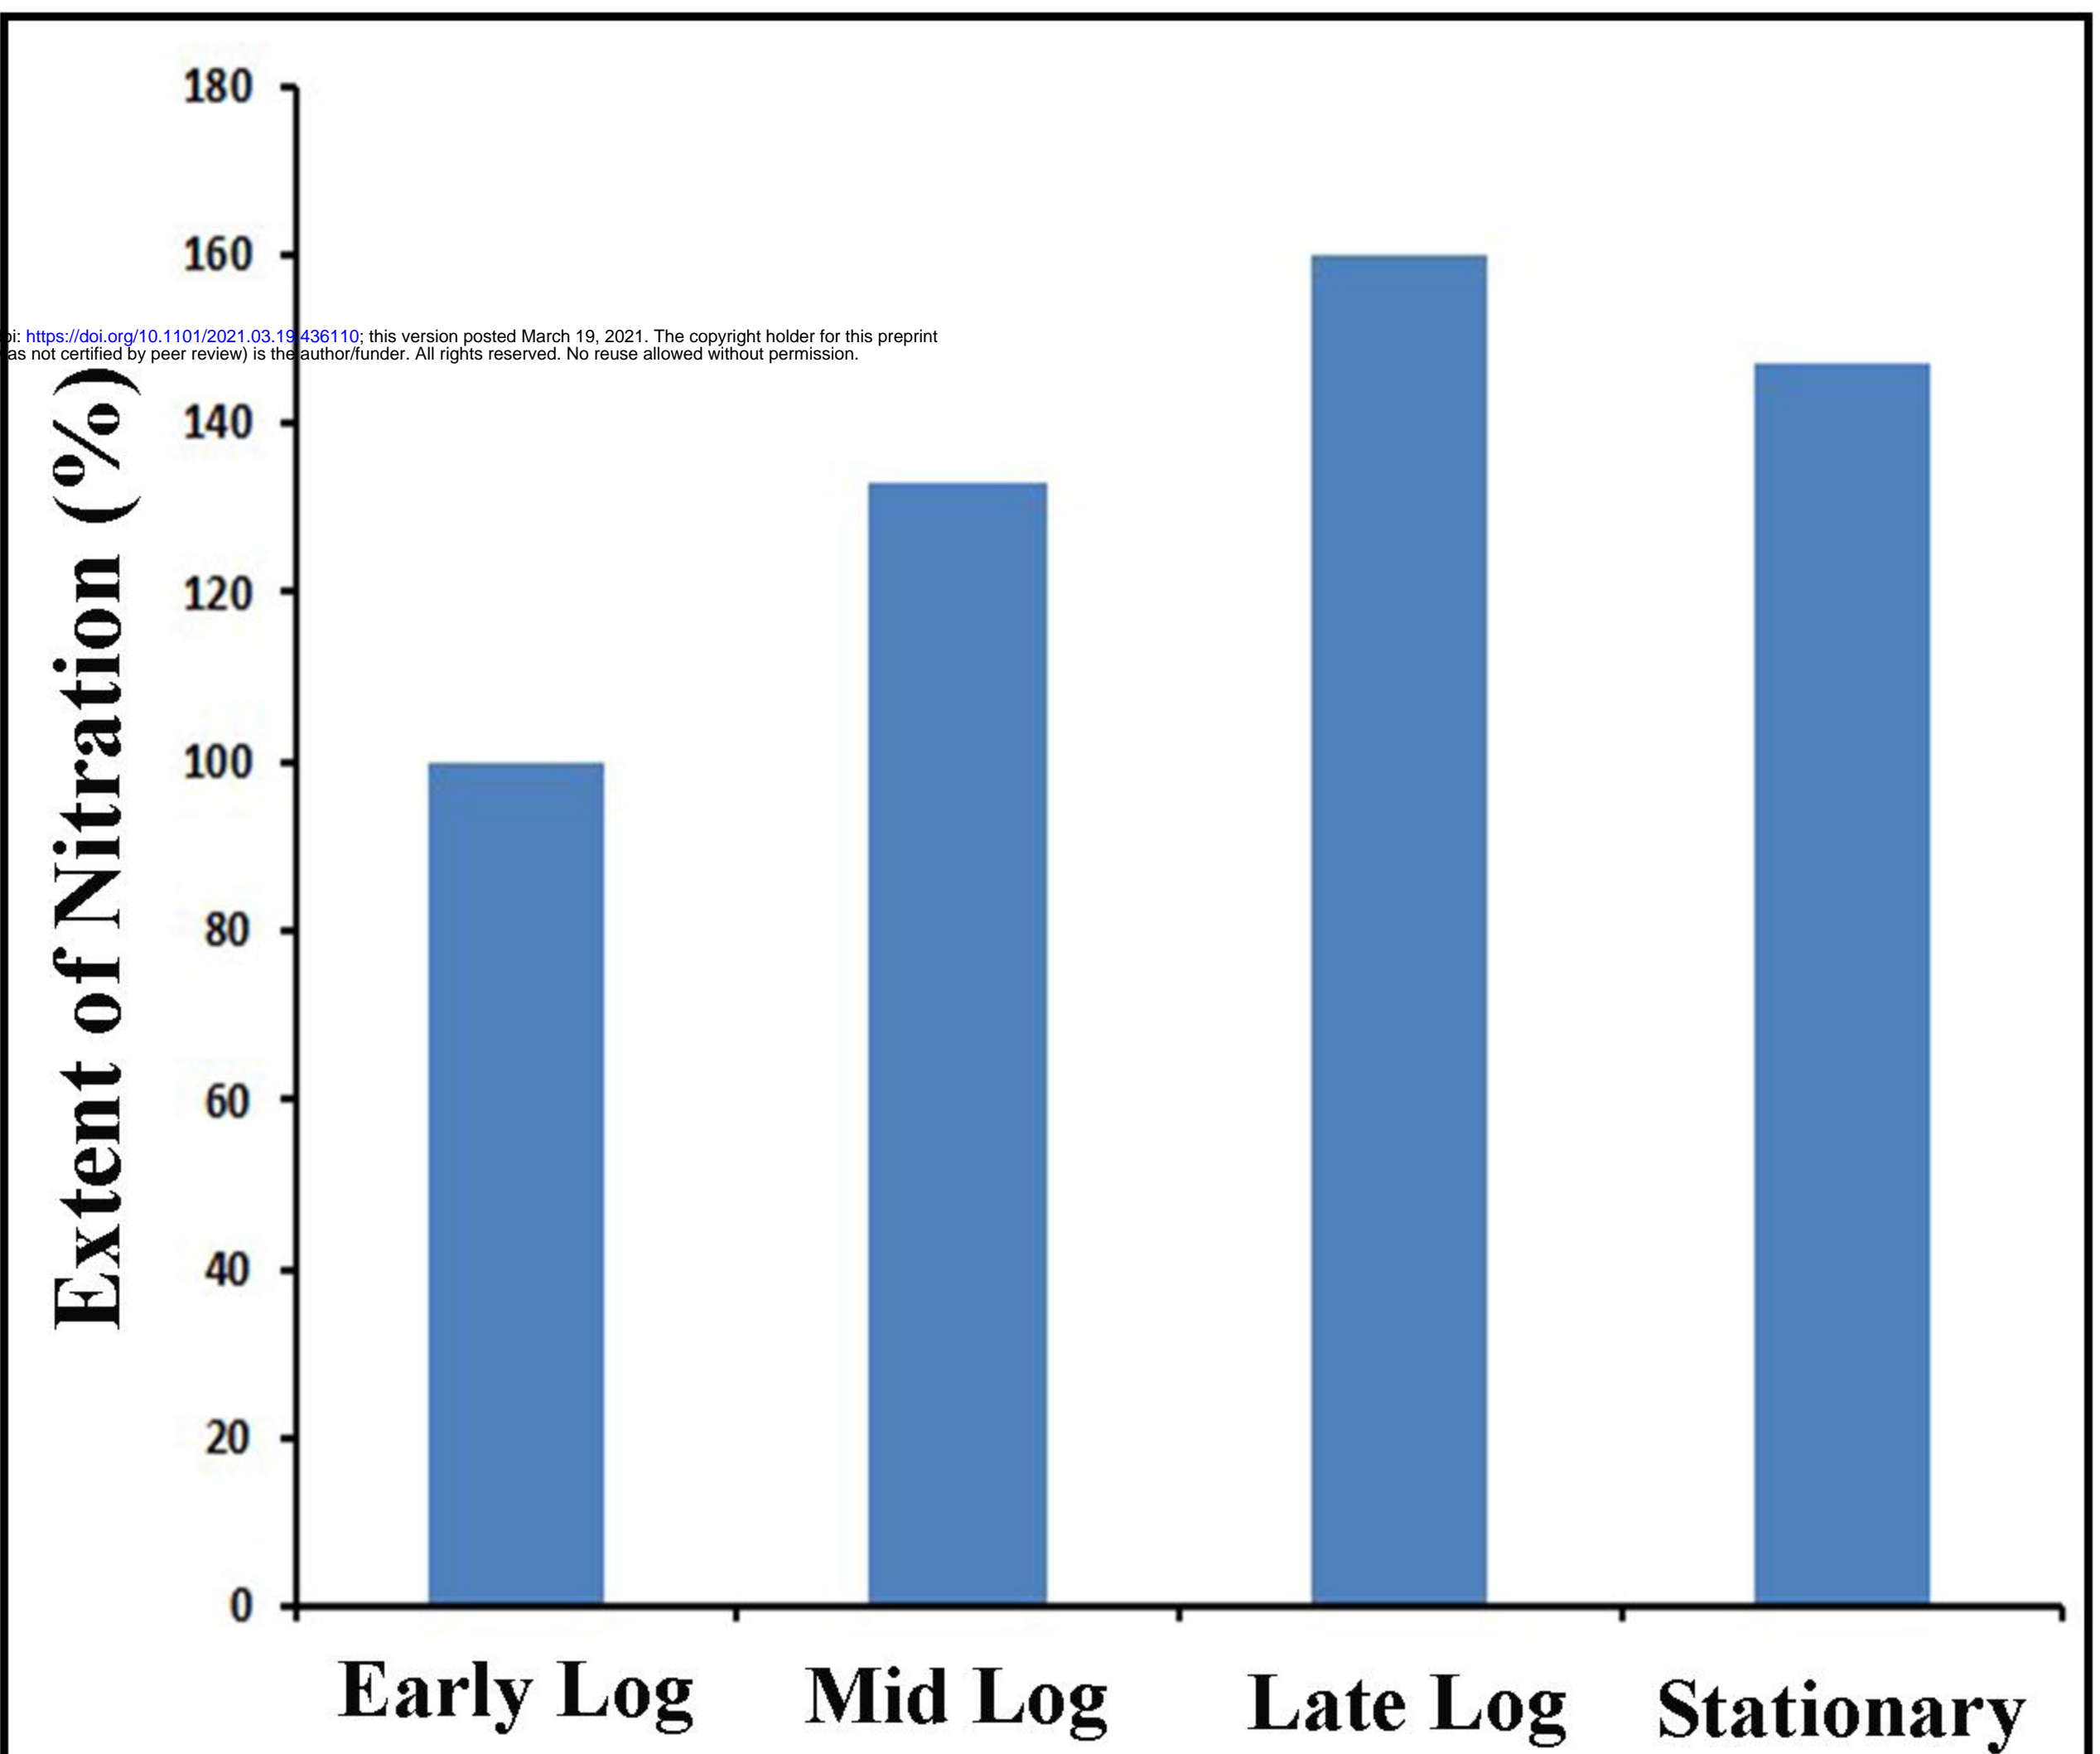

Figure 2

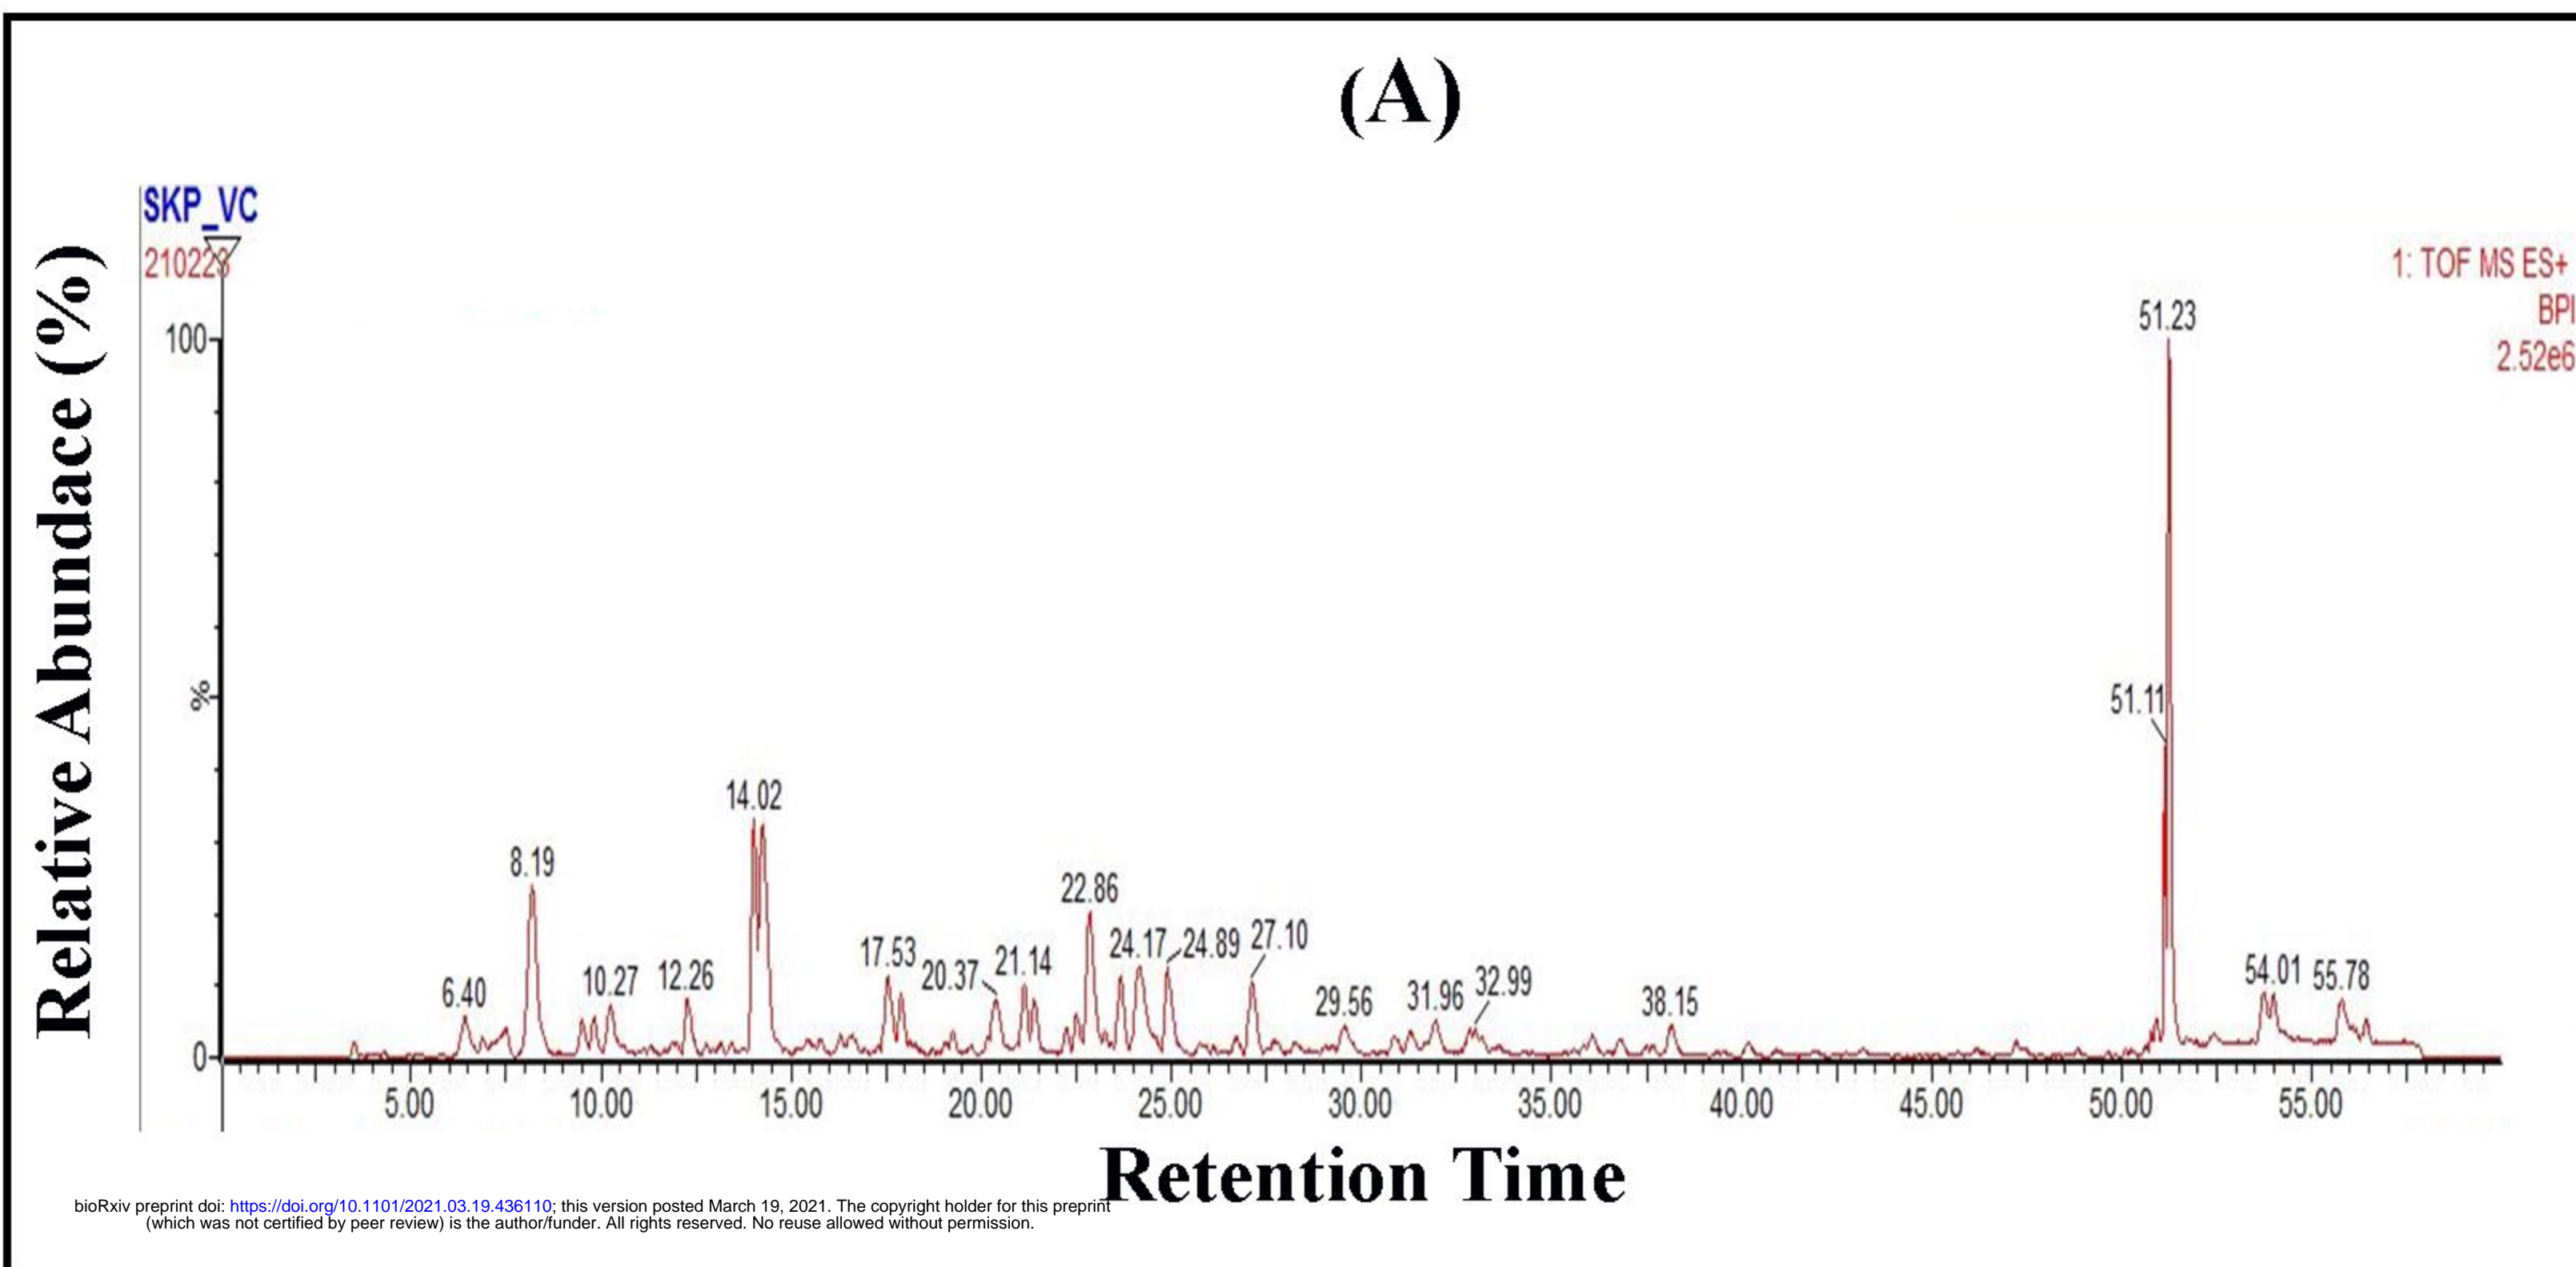

- Glycolysis/Gluconeogenesis/PPP
- TCA cycle
- Electron Transport Chain
- Nucleotide metabolism
- Carbohydrate metabolism
- Amino acid/Protein metabolism
- Lipid metabolism
- Porin or transporter proteins
- Redox/stress protective proteins
- Other housekeeping proteins/enzymes

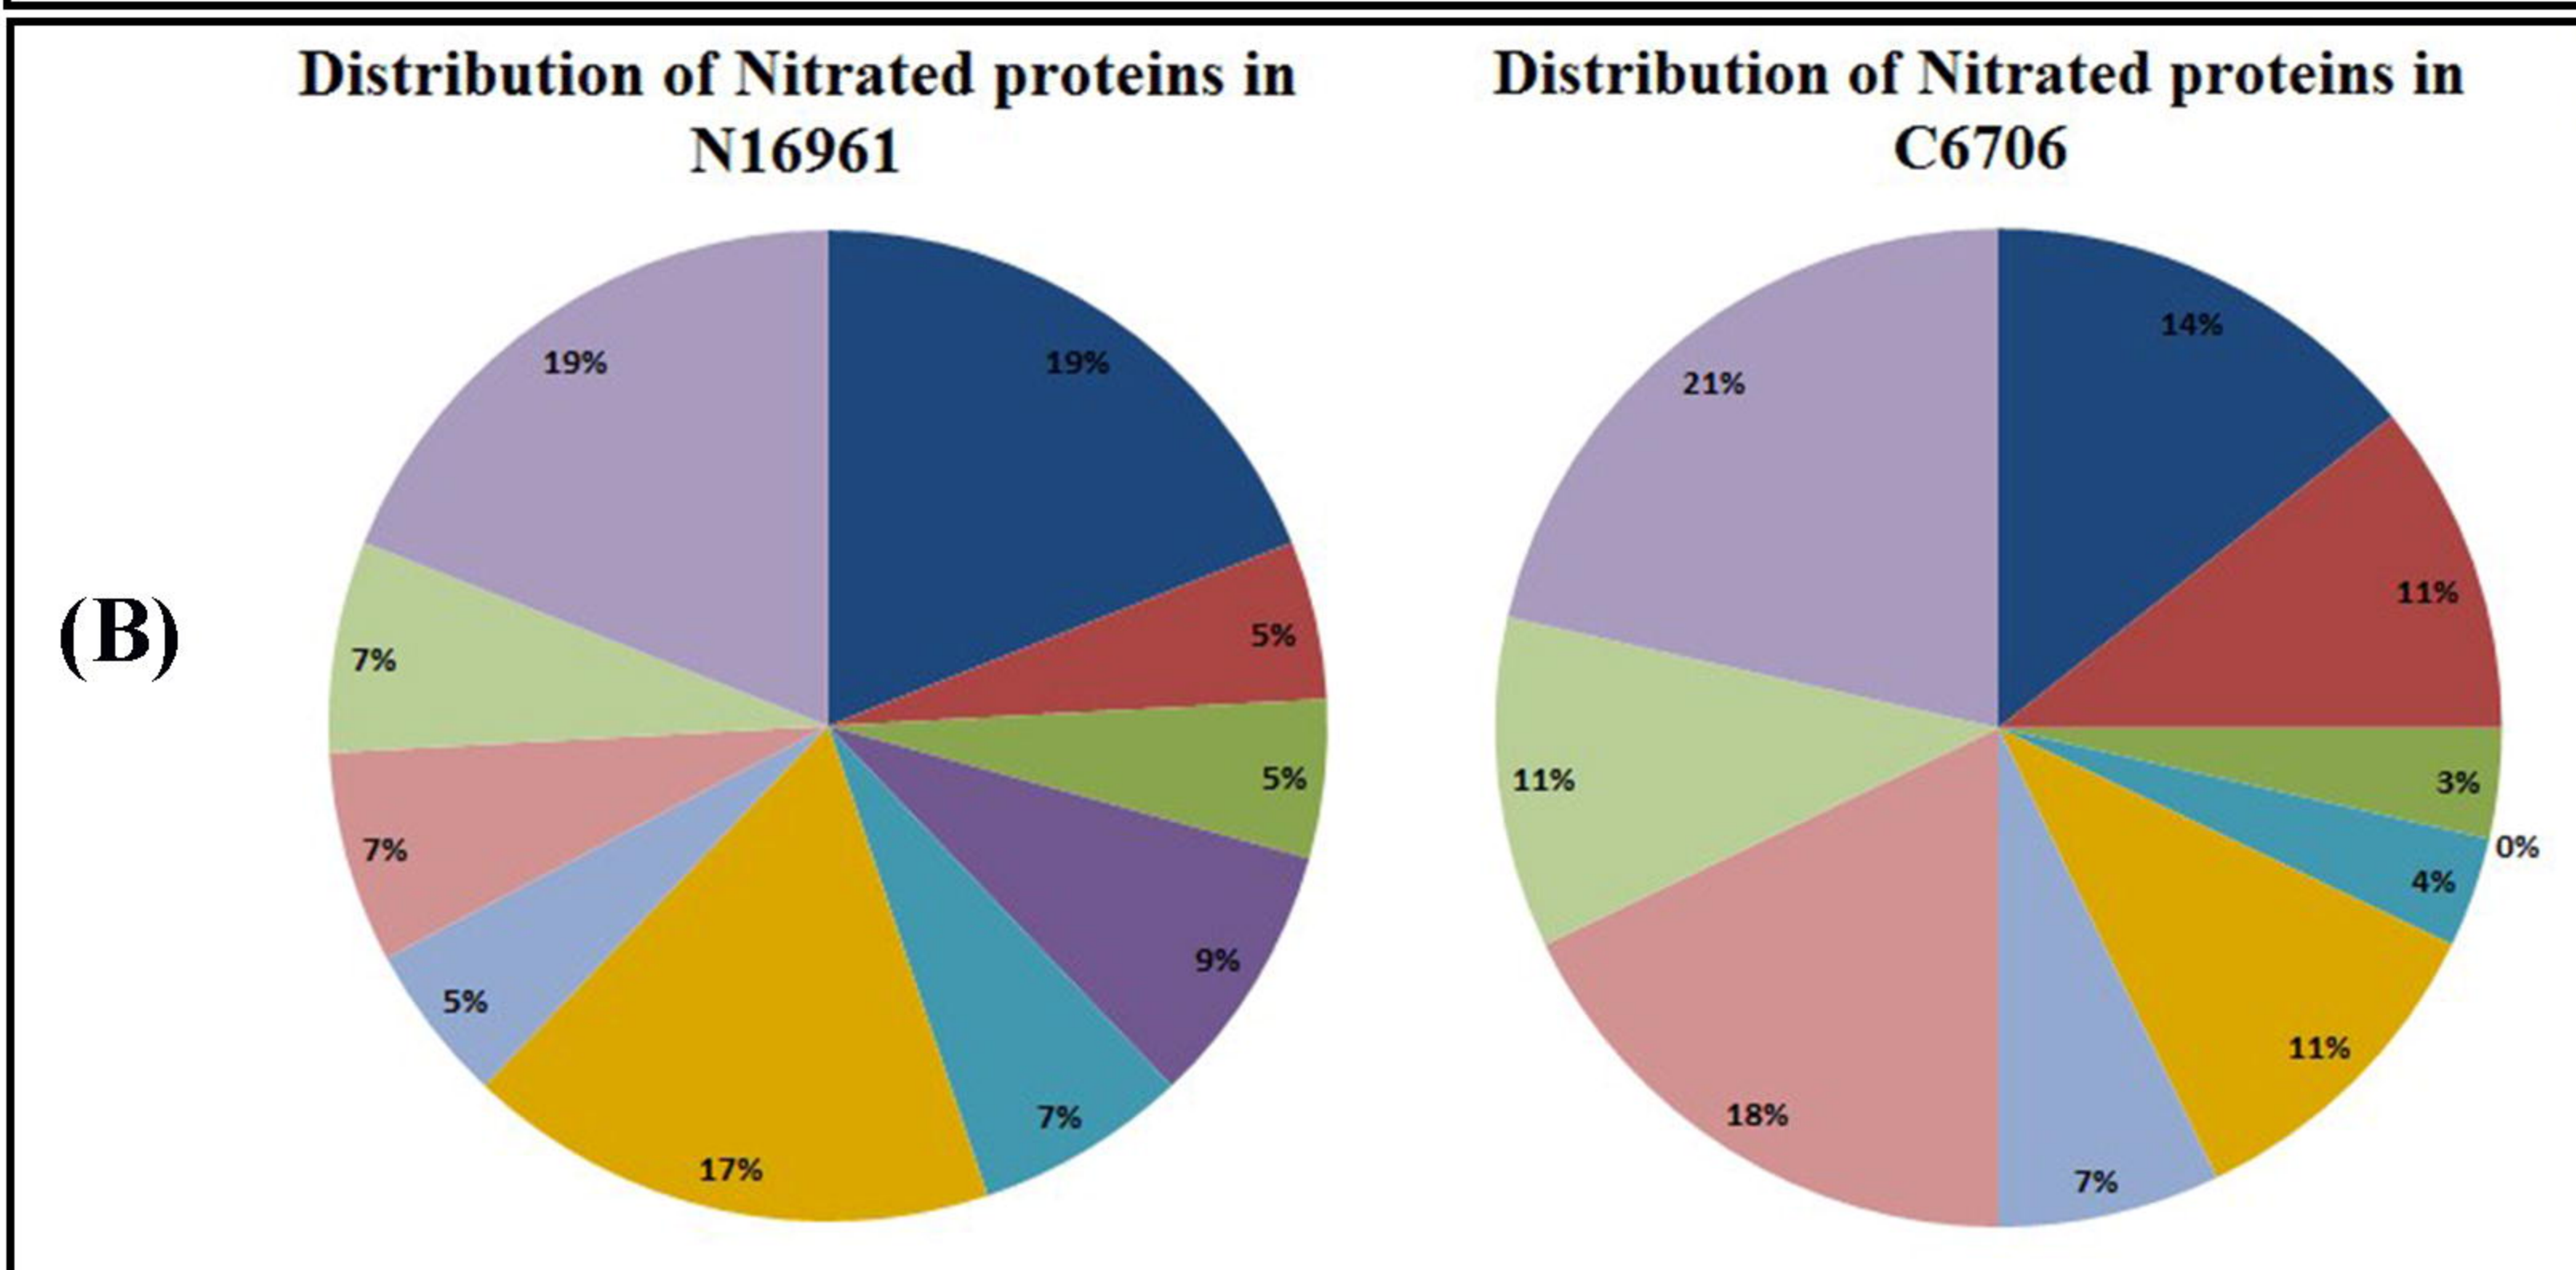

Figure 3



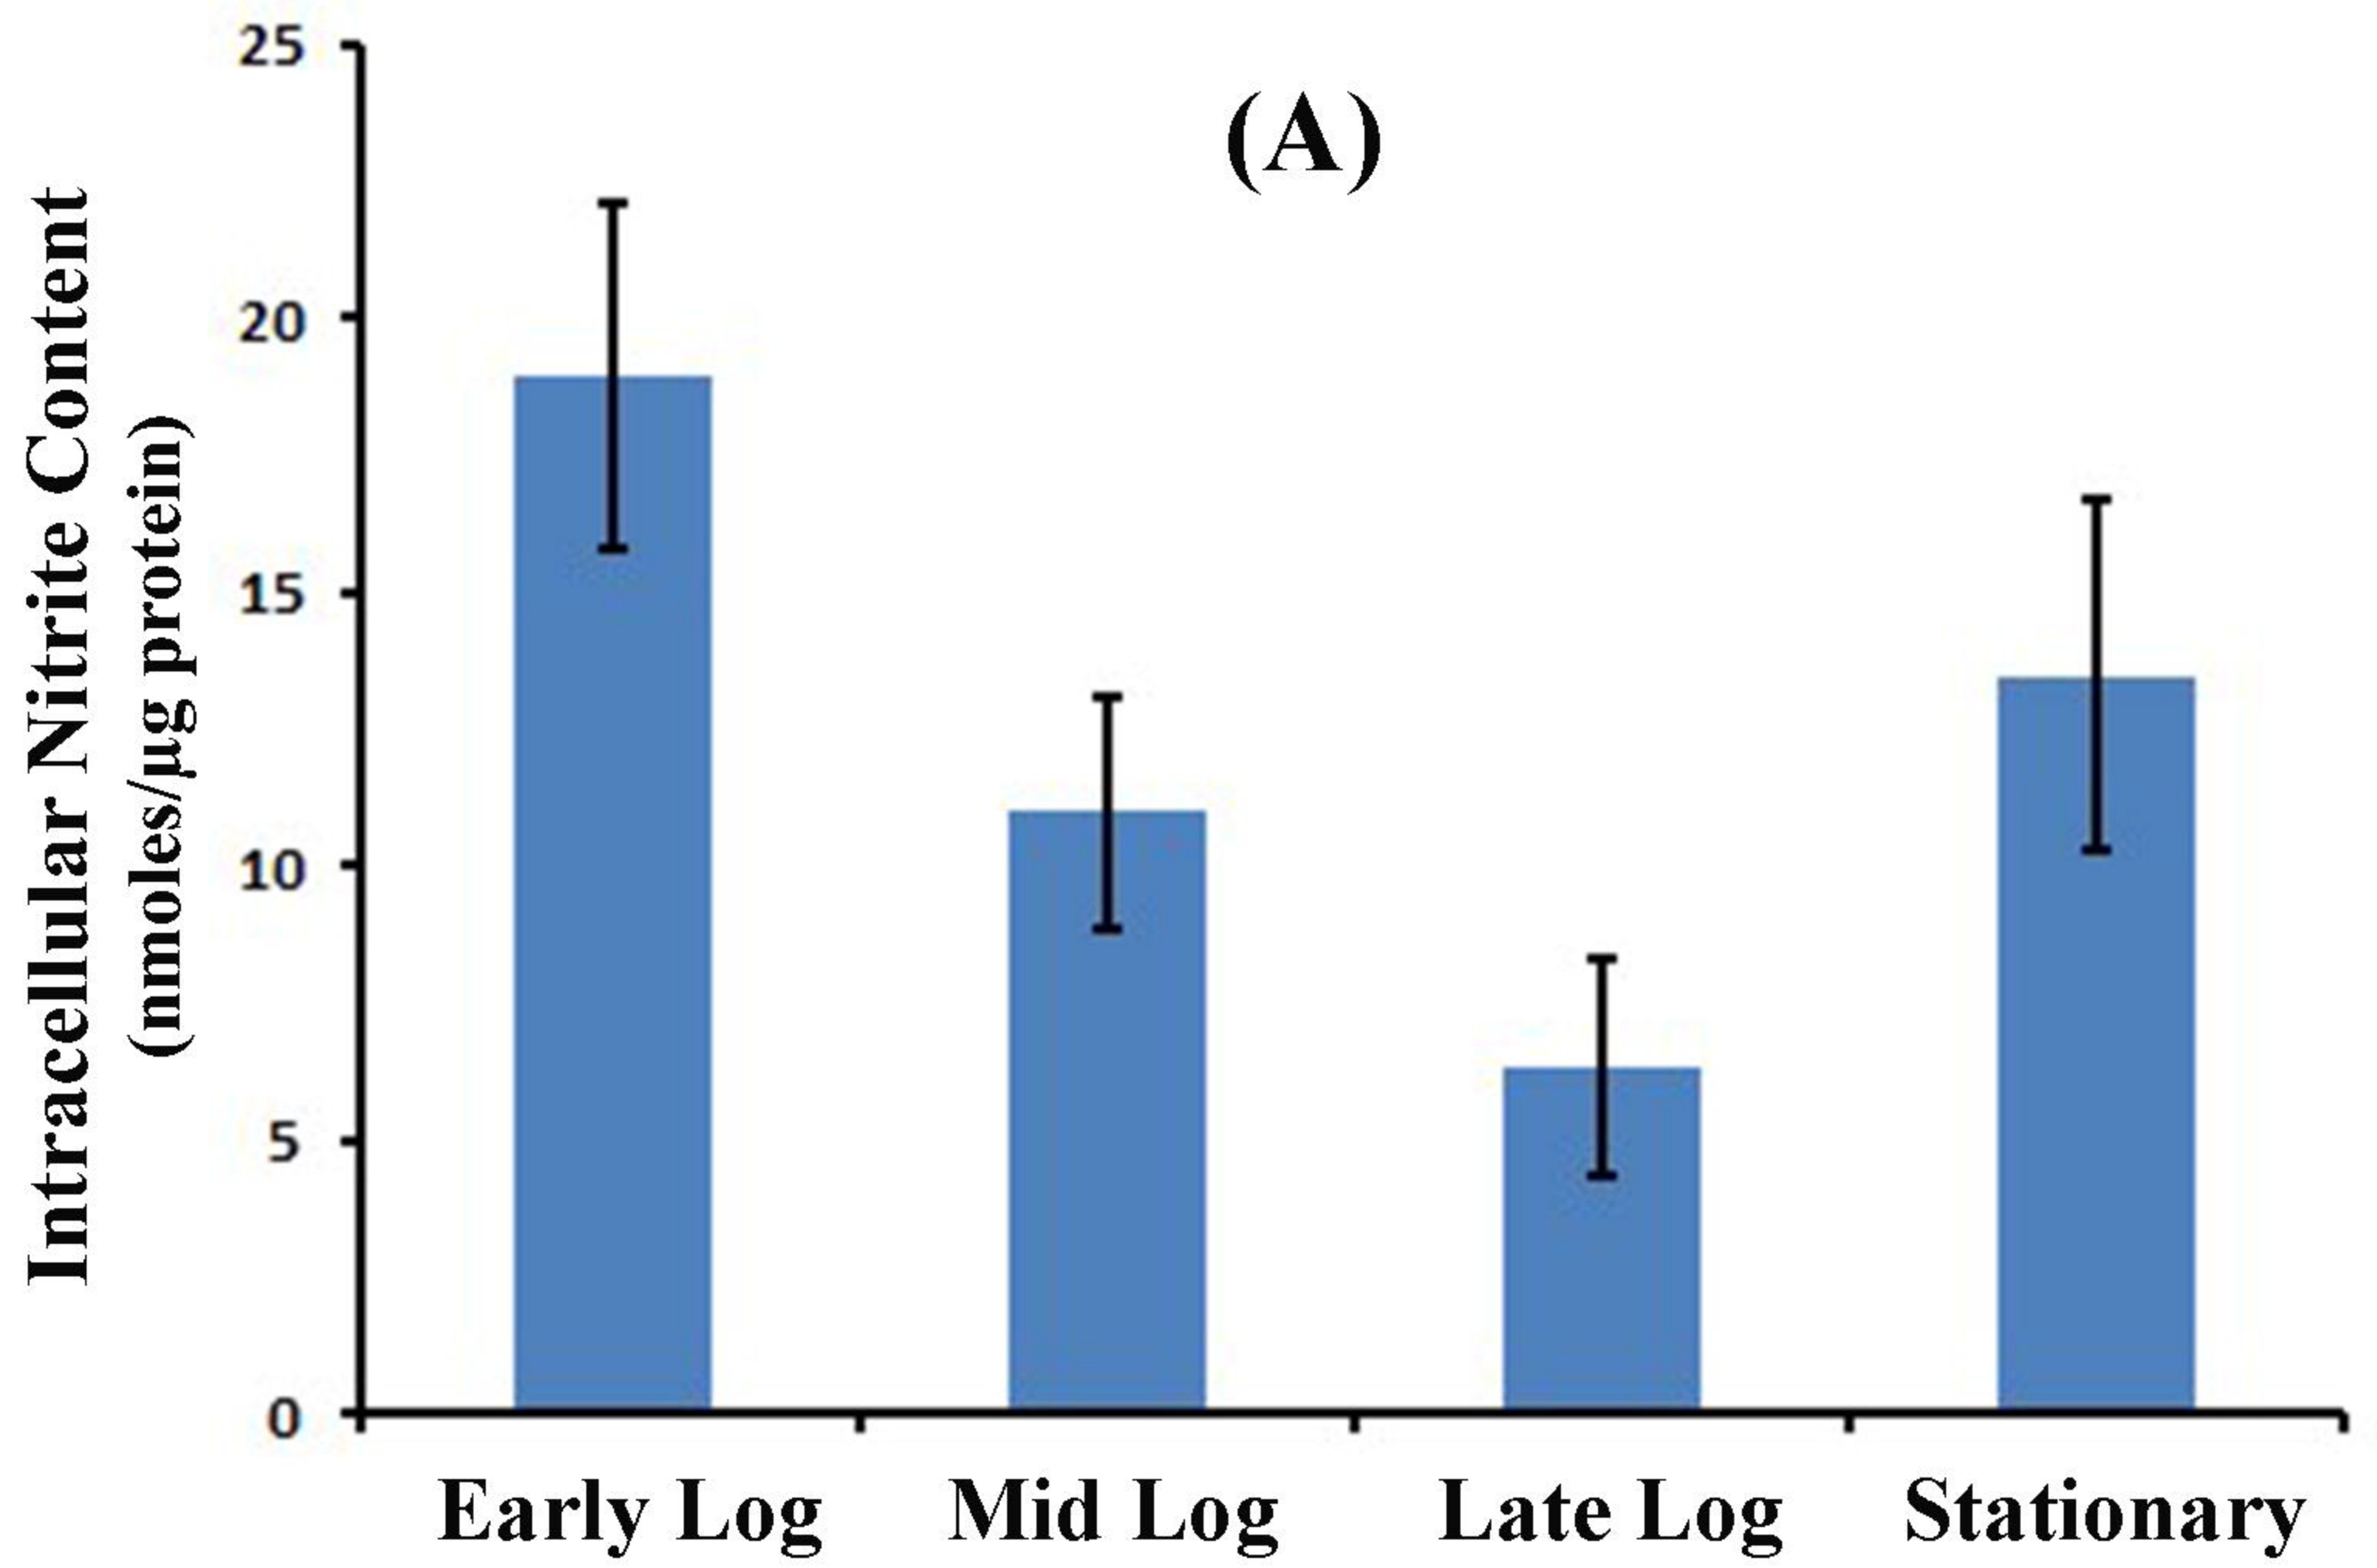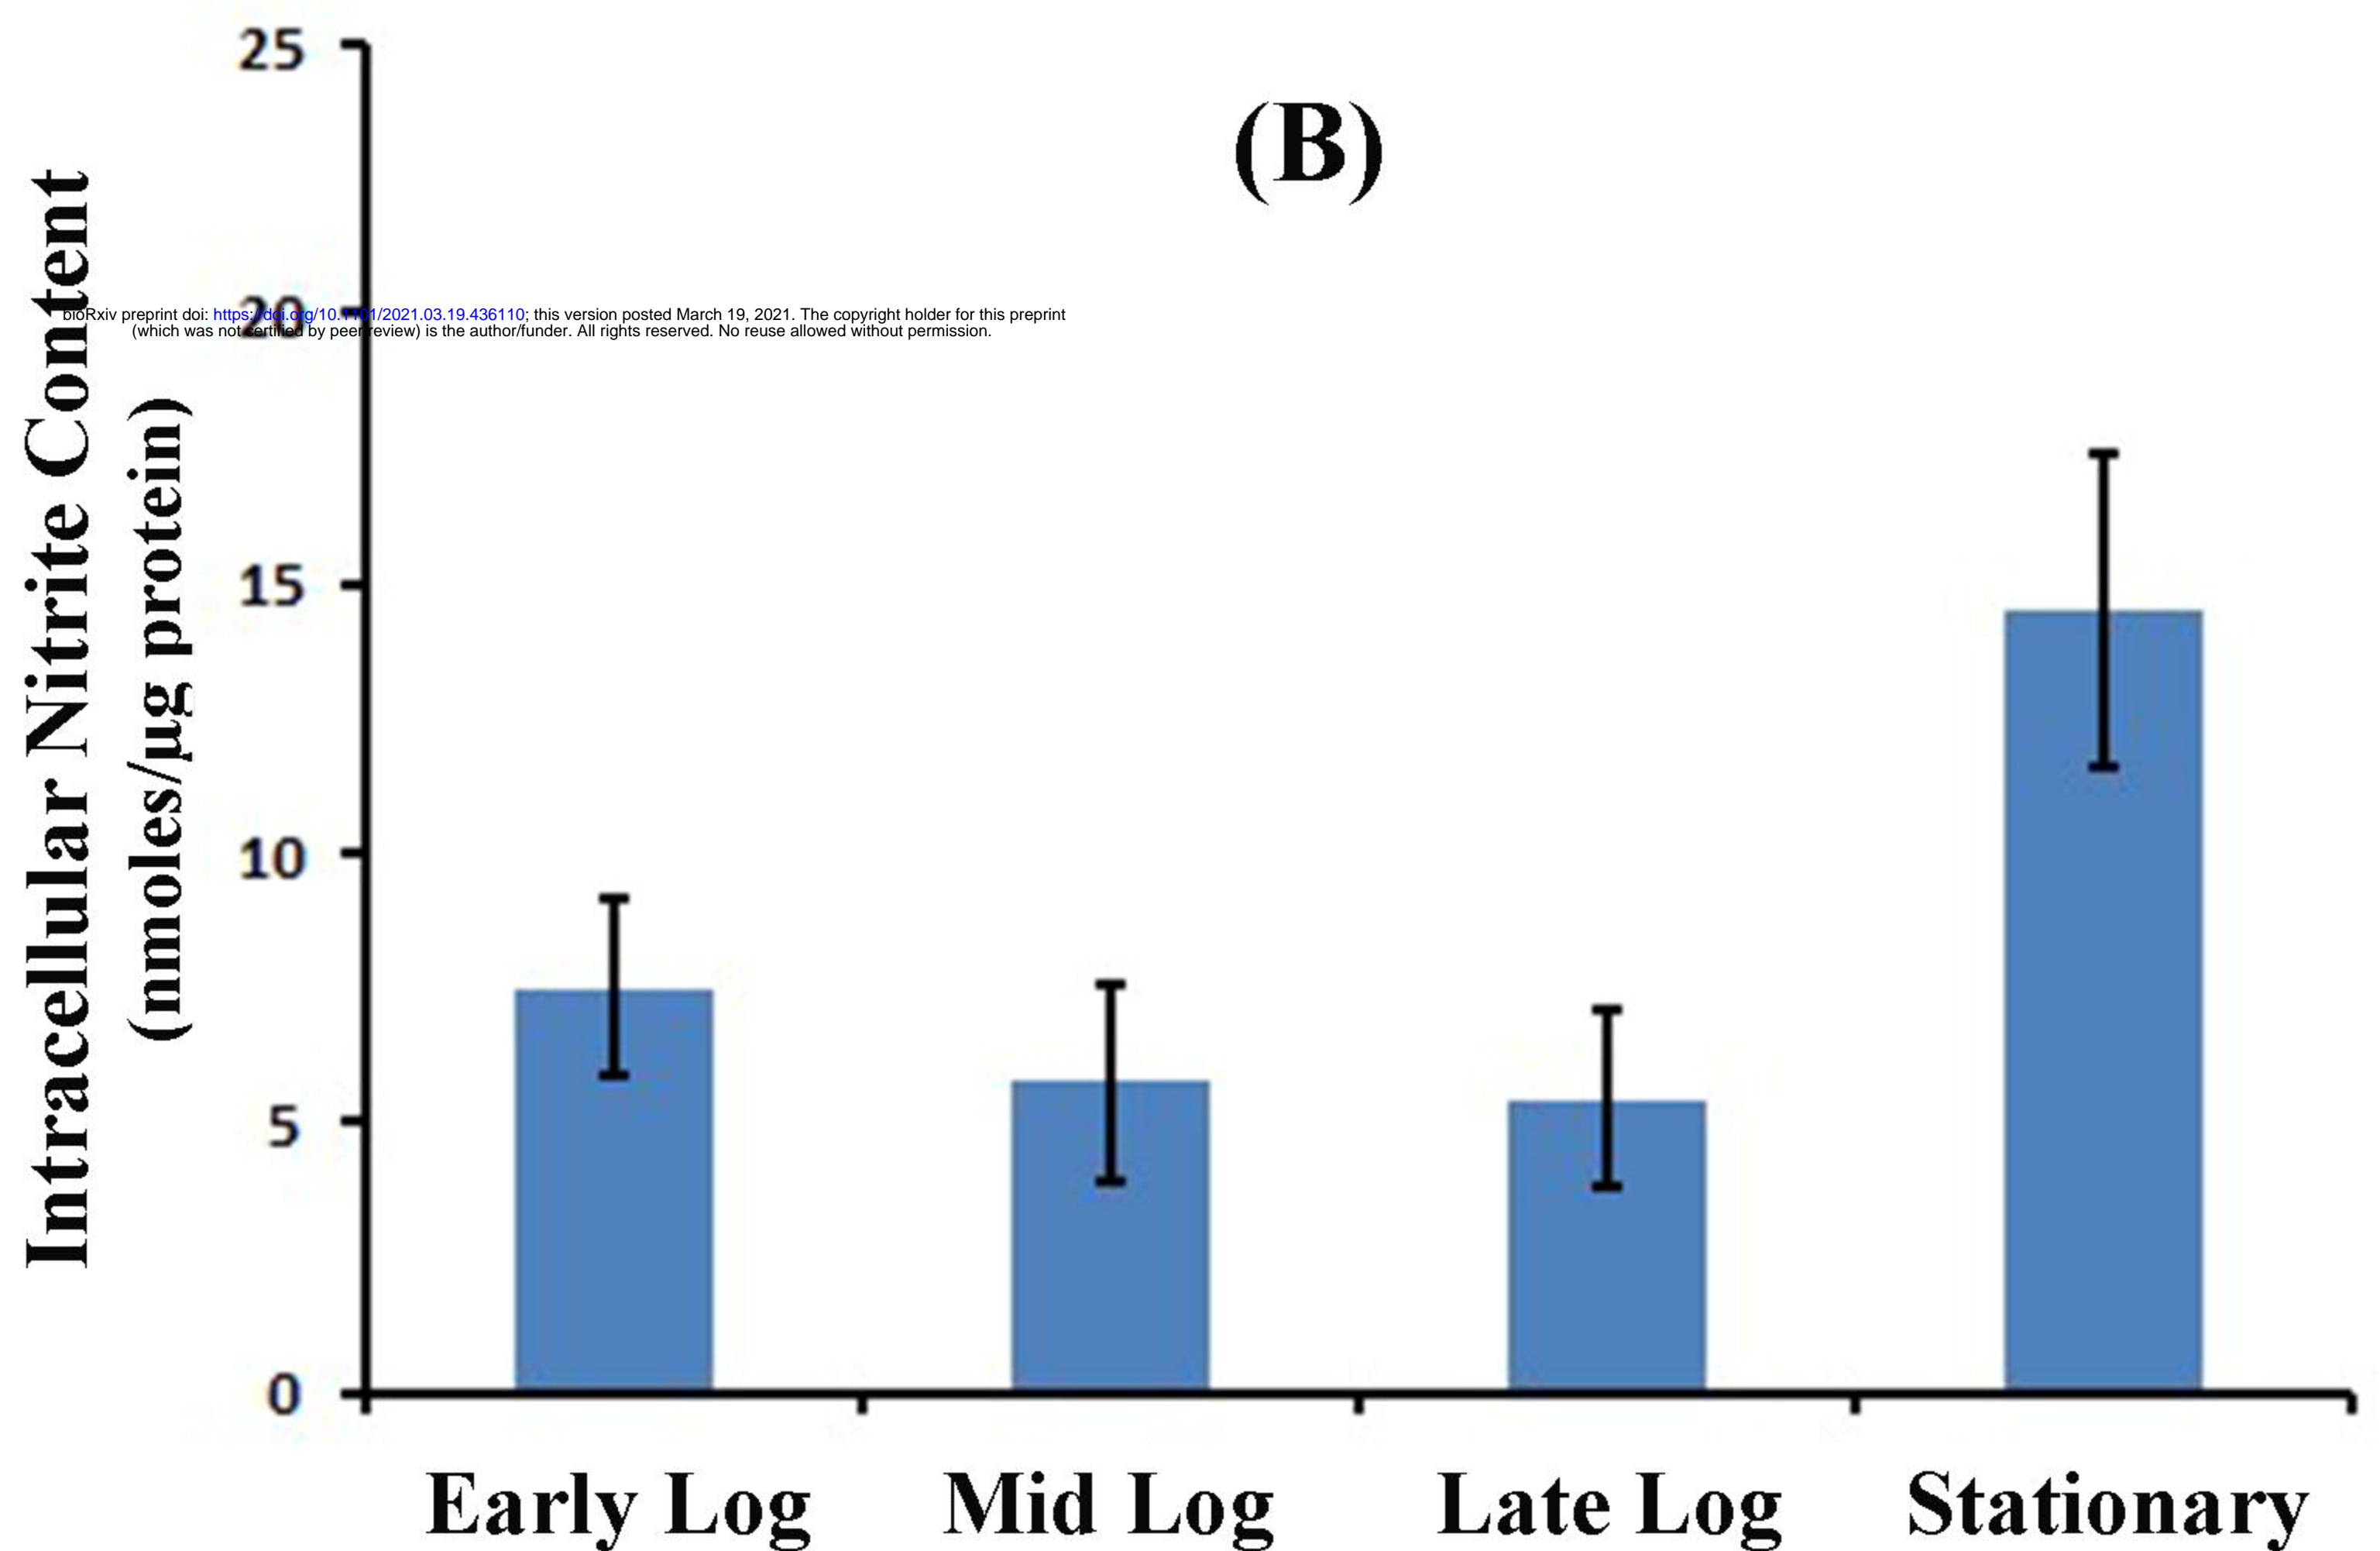

**Figure 4**

(A)

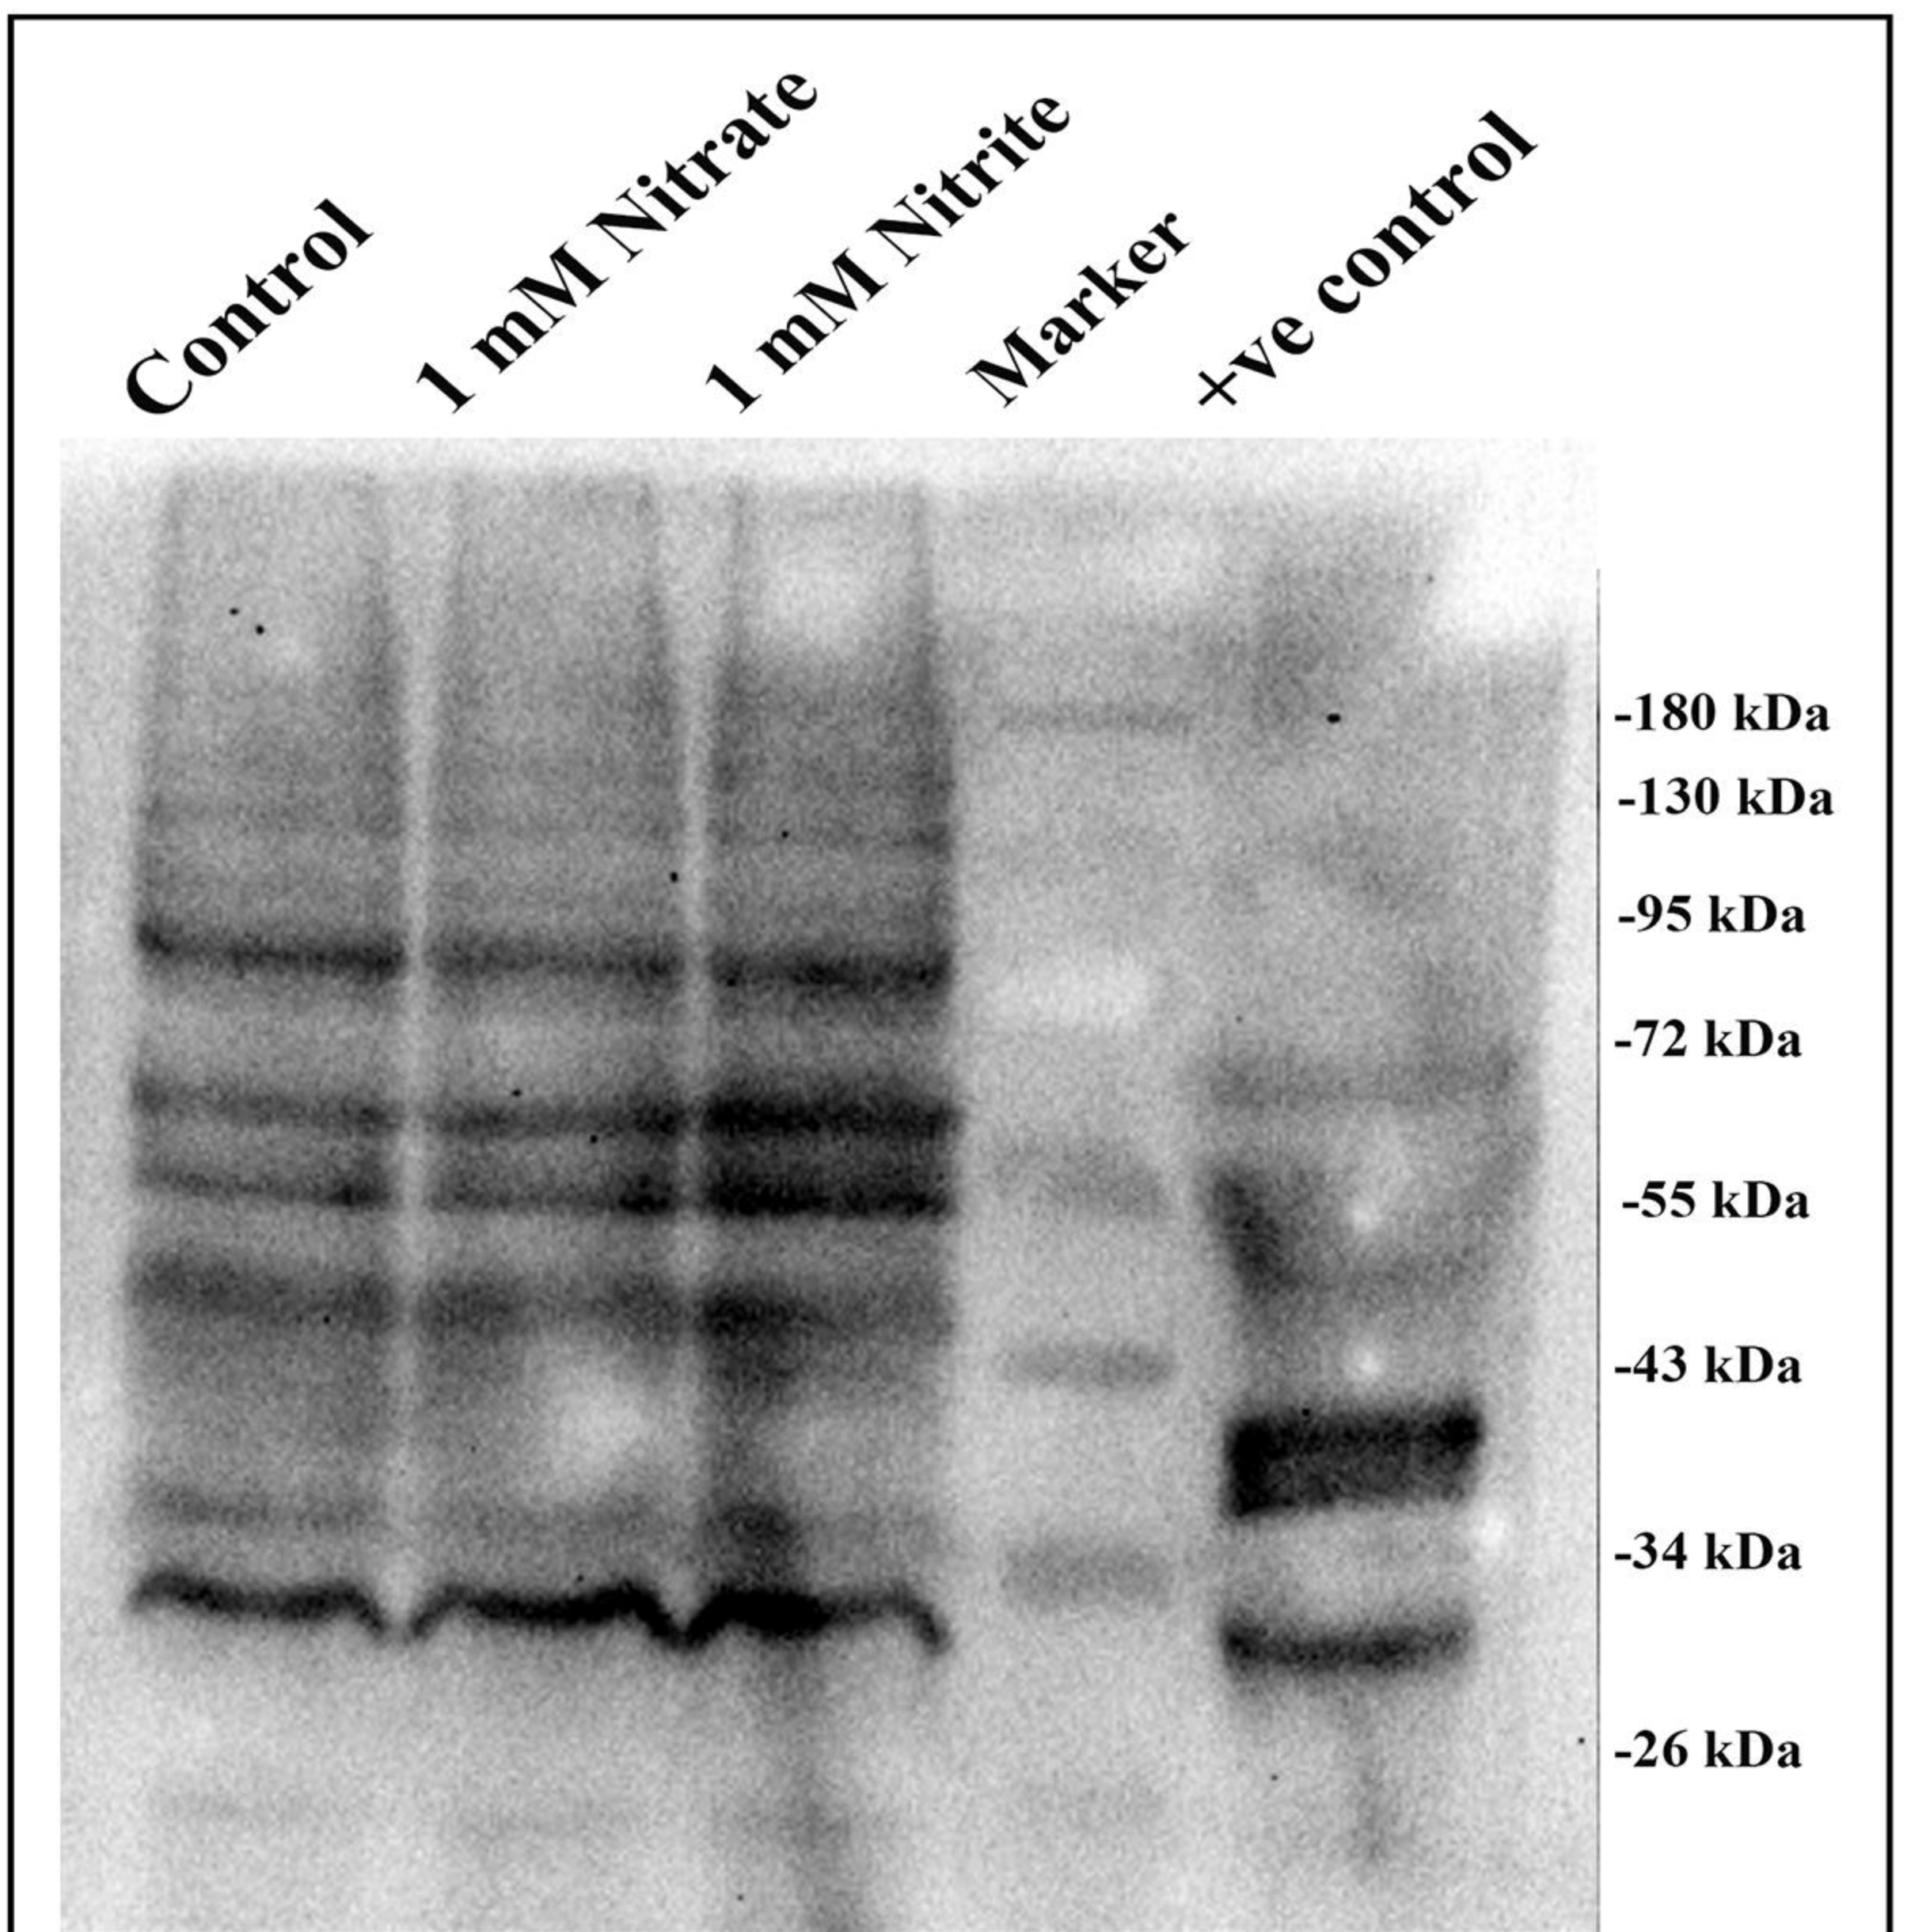

(B)

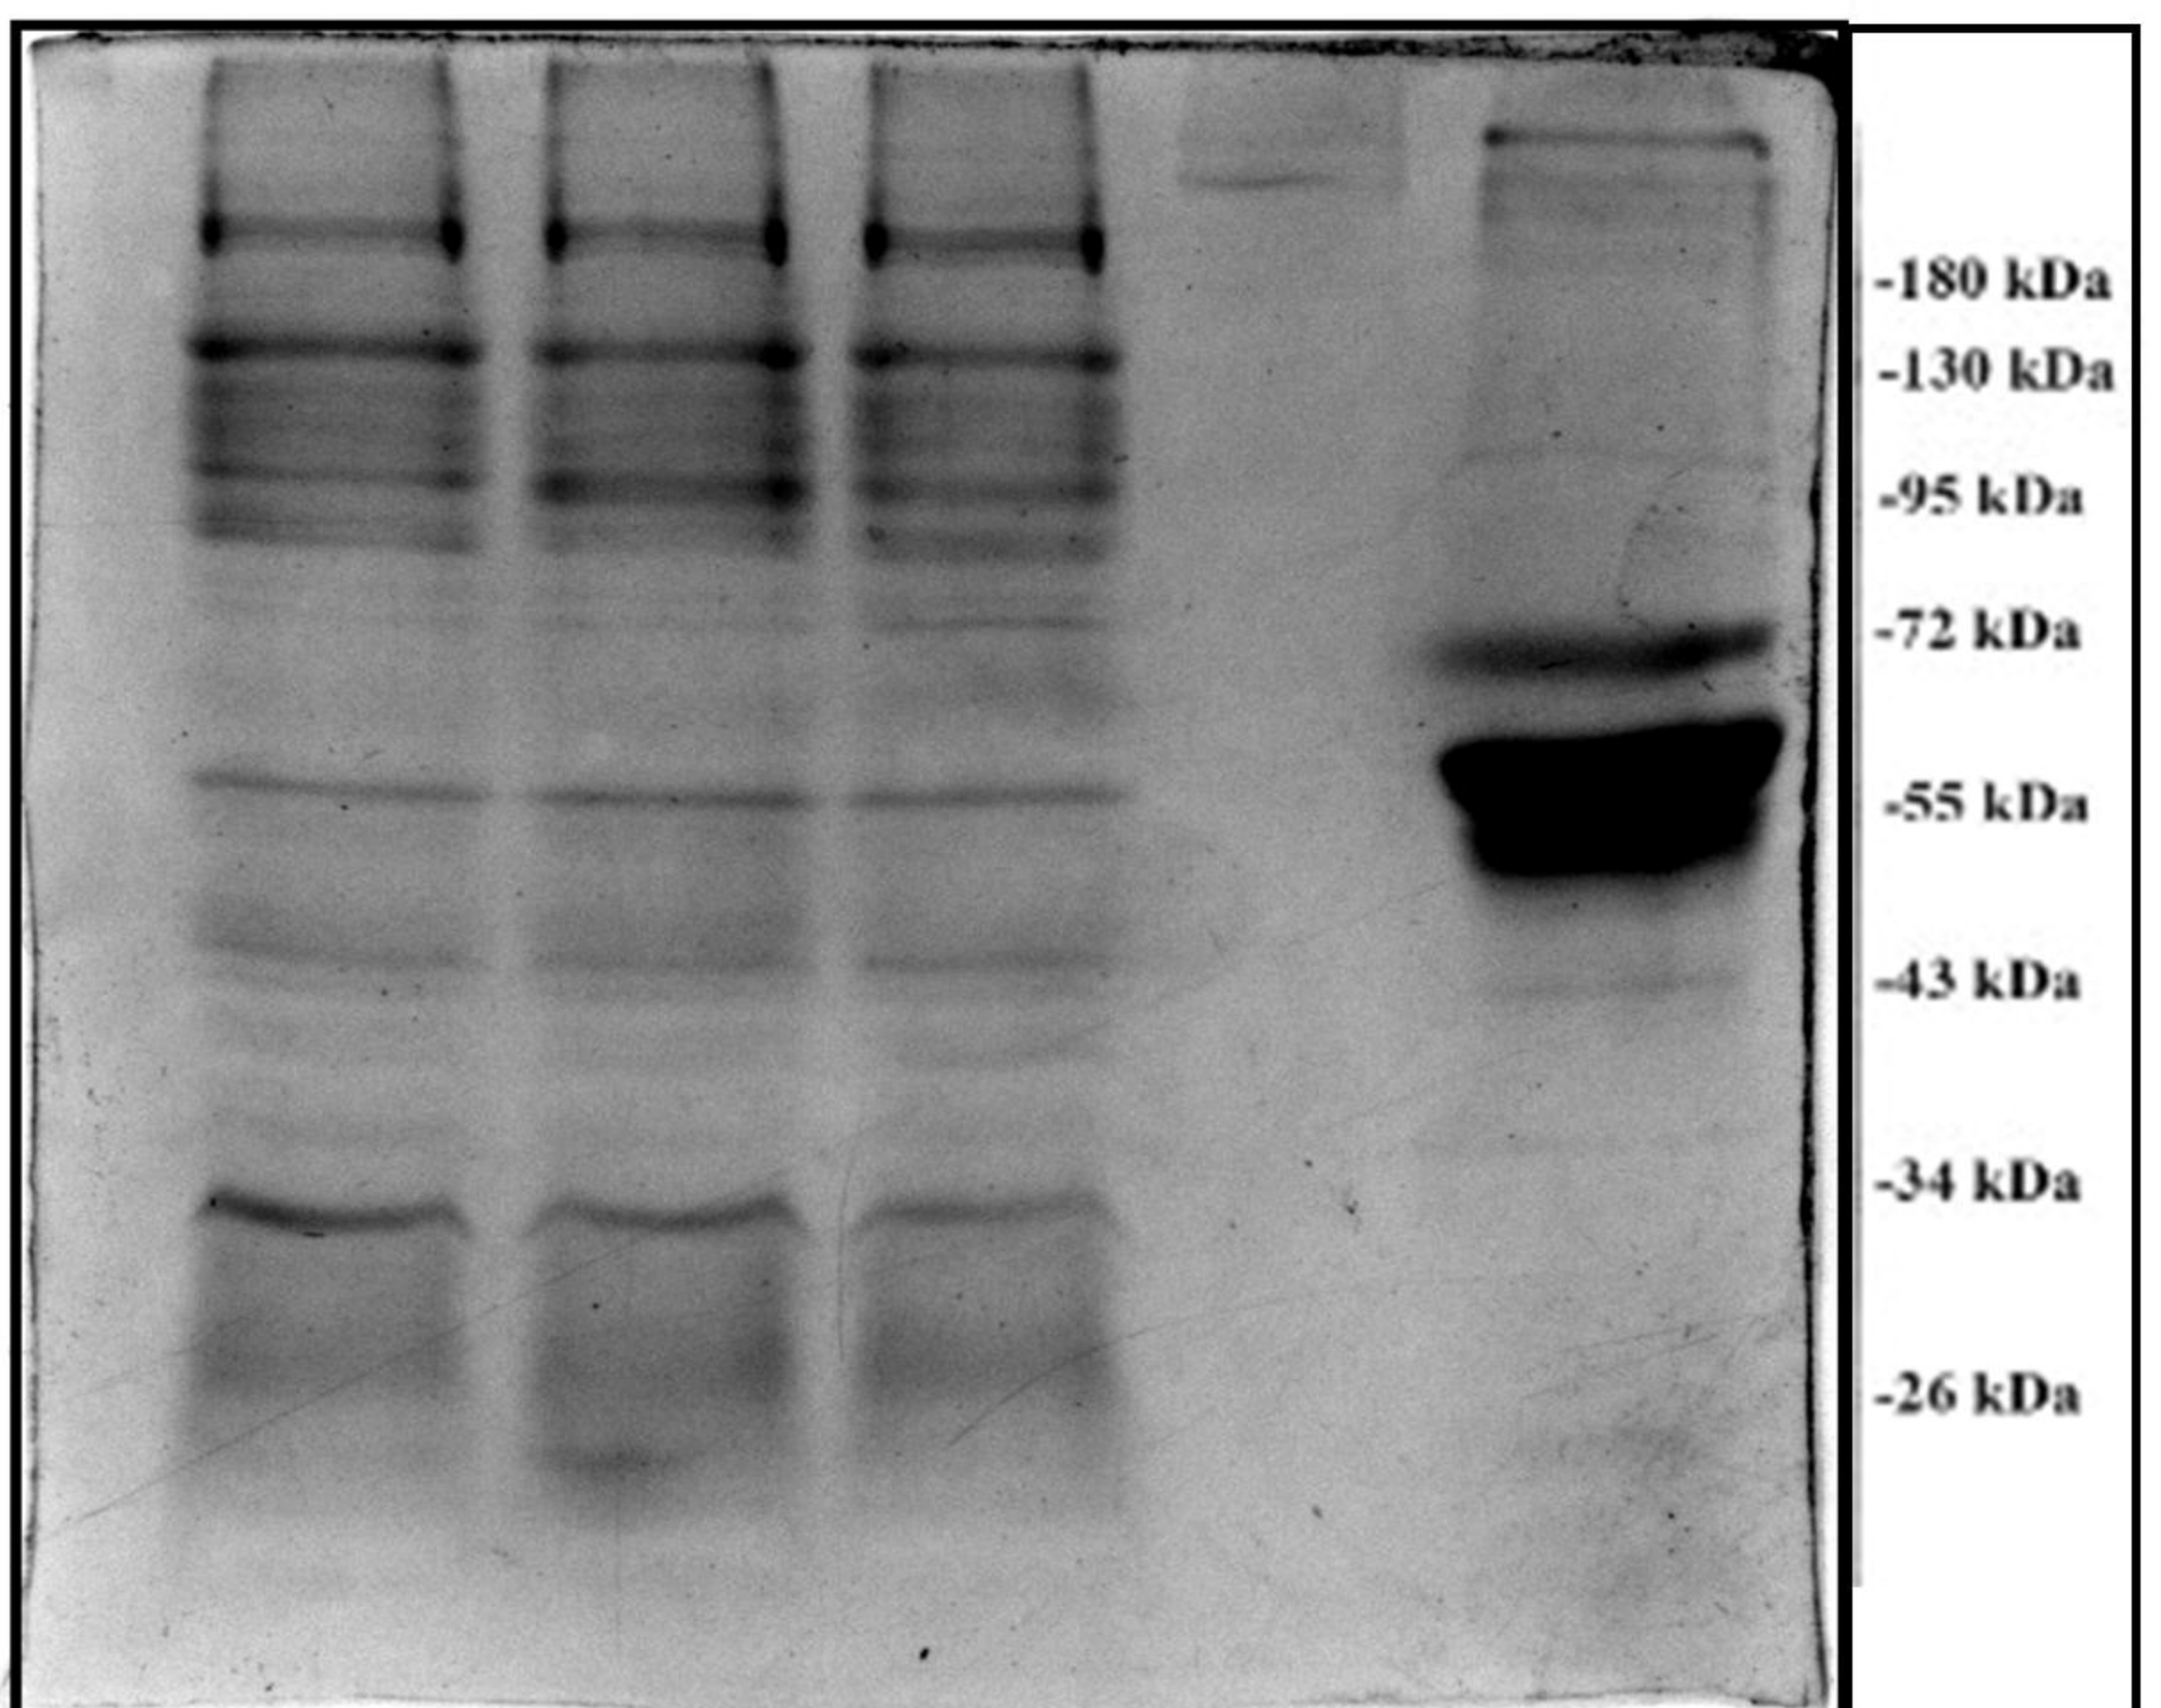

(C)

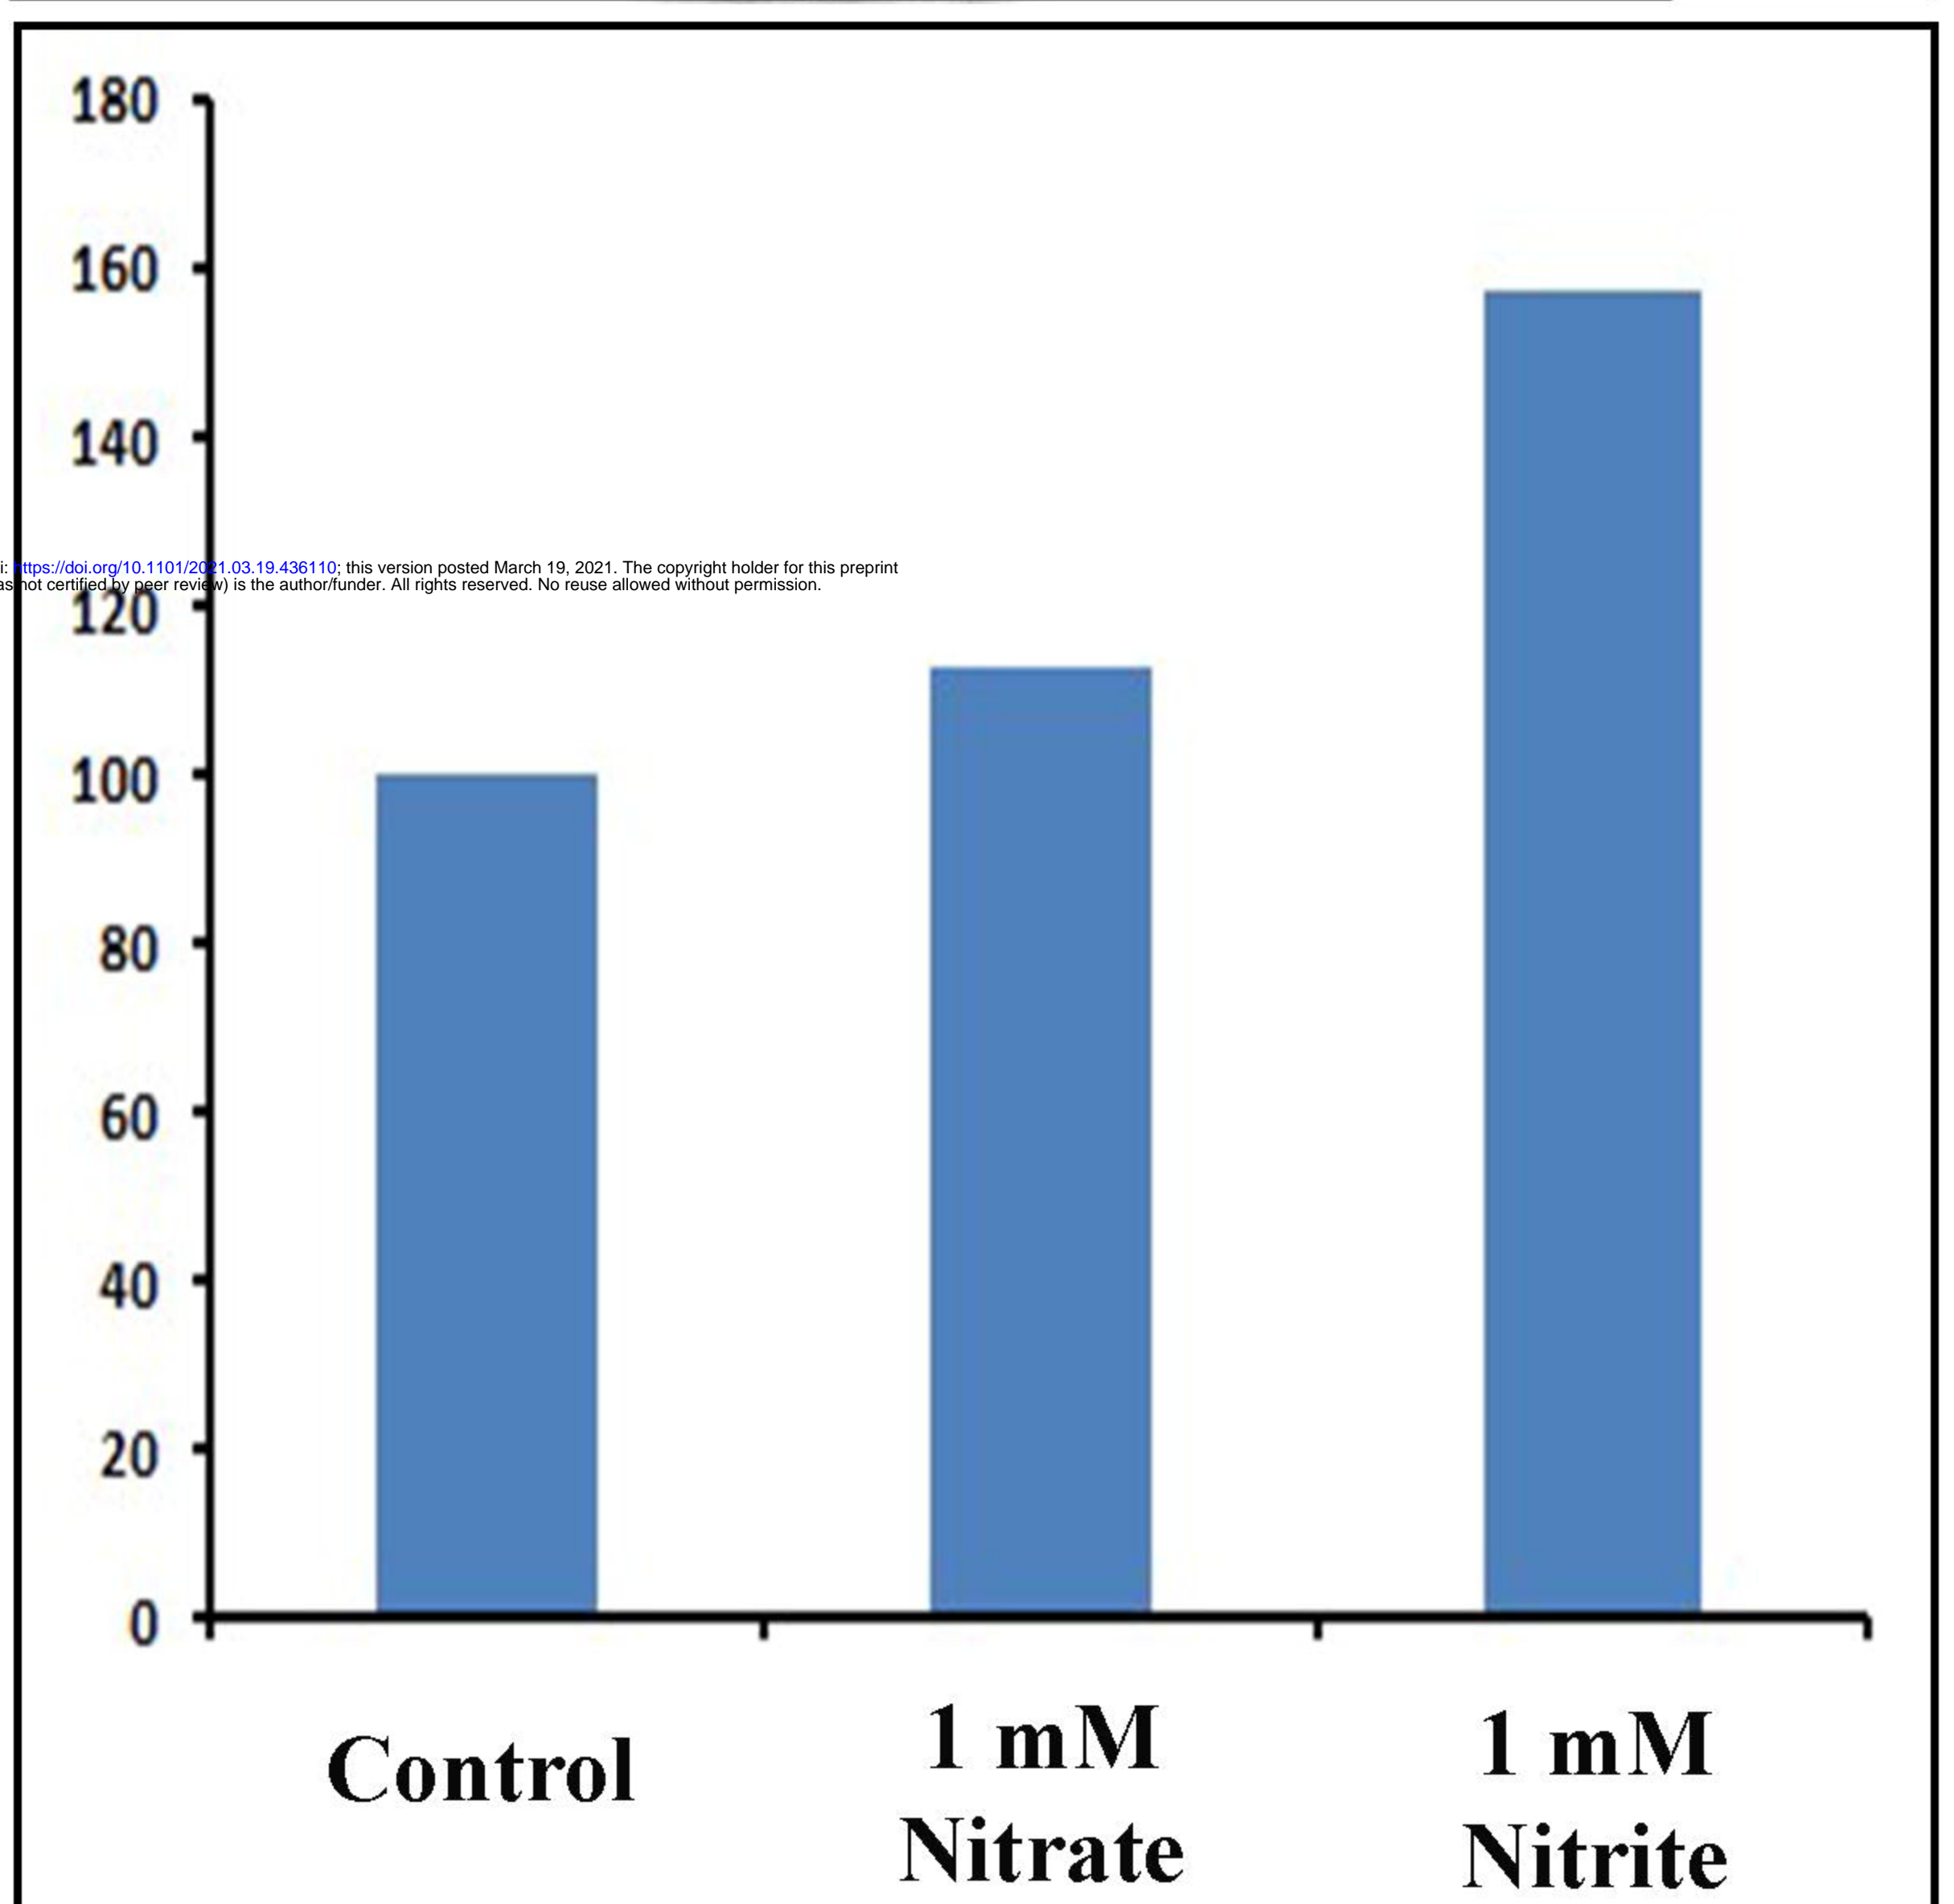

Figure 5

(A)

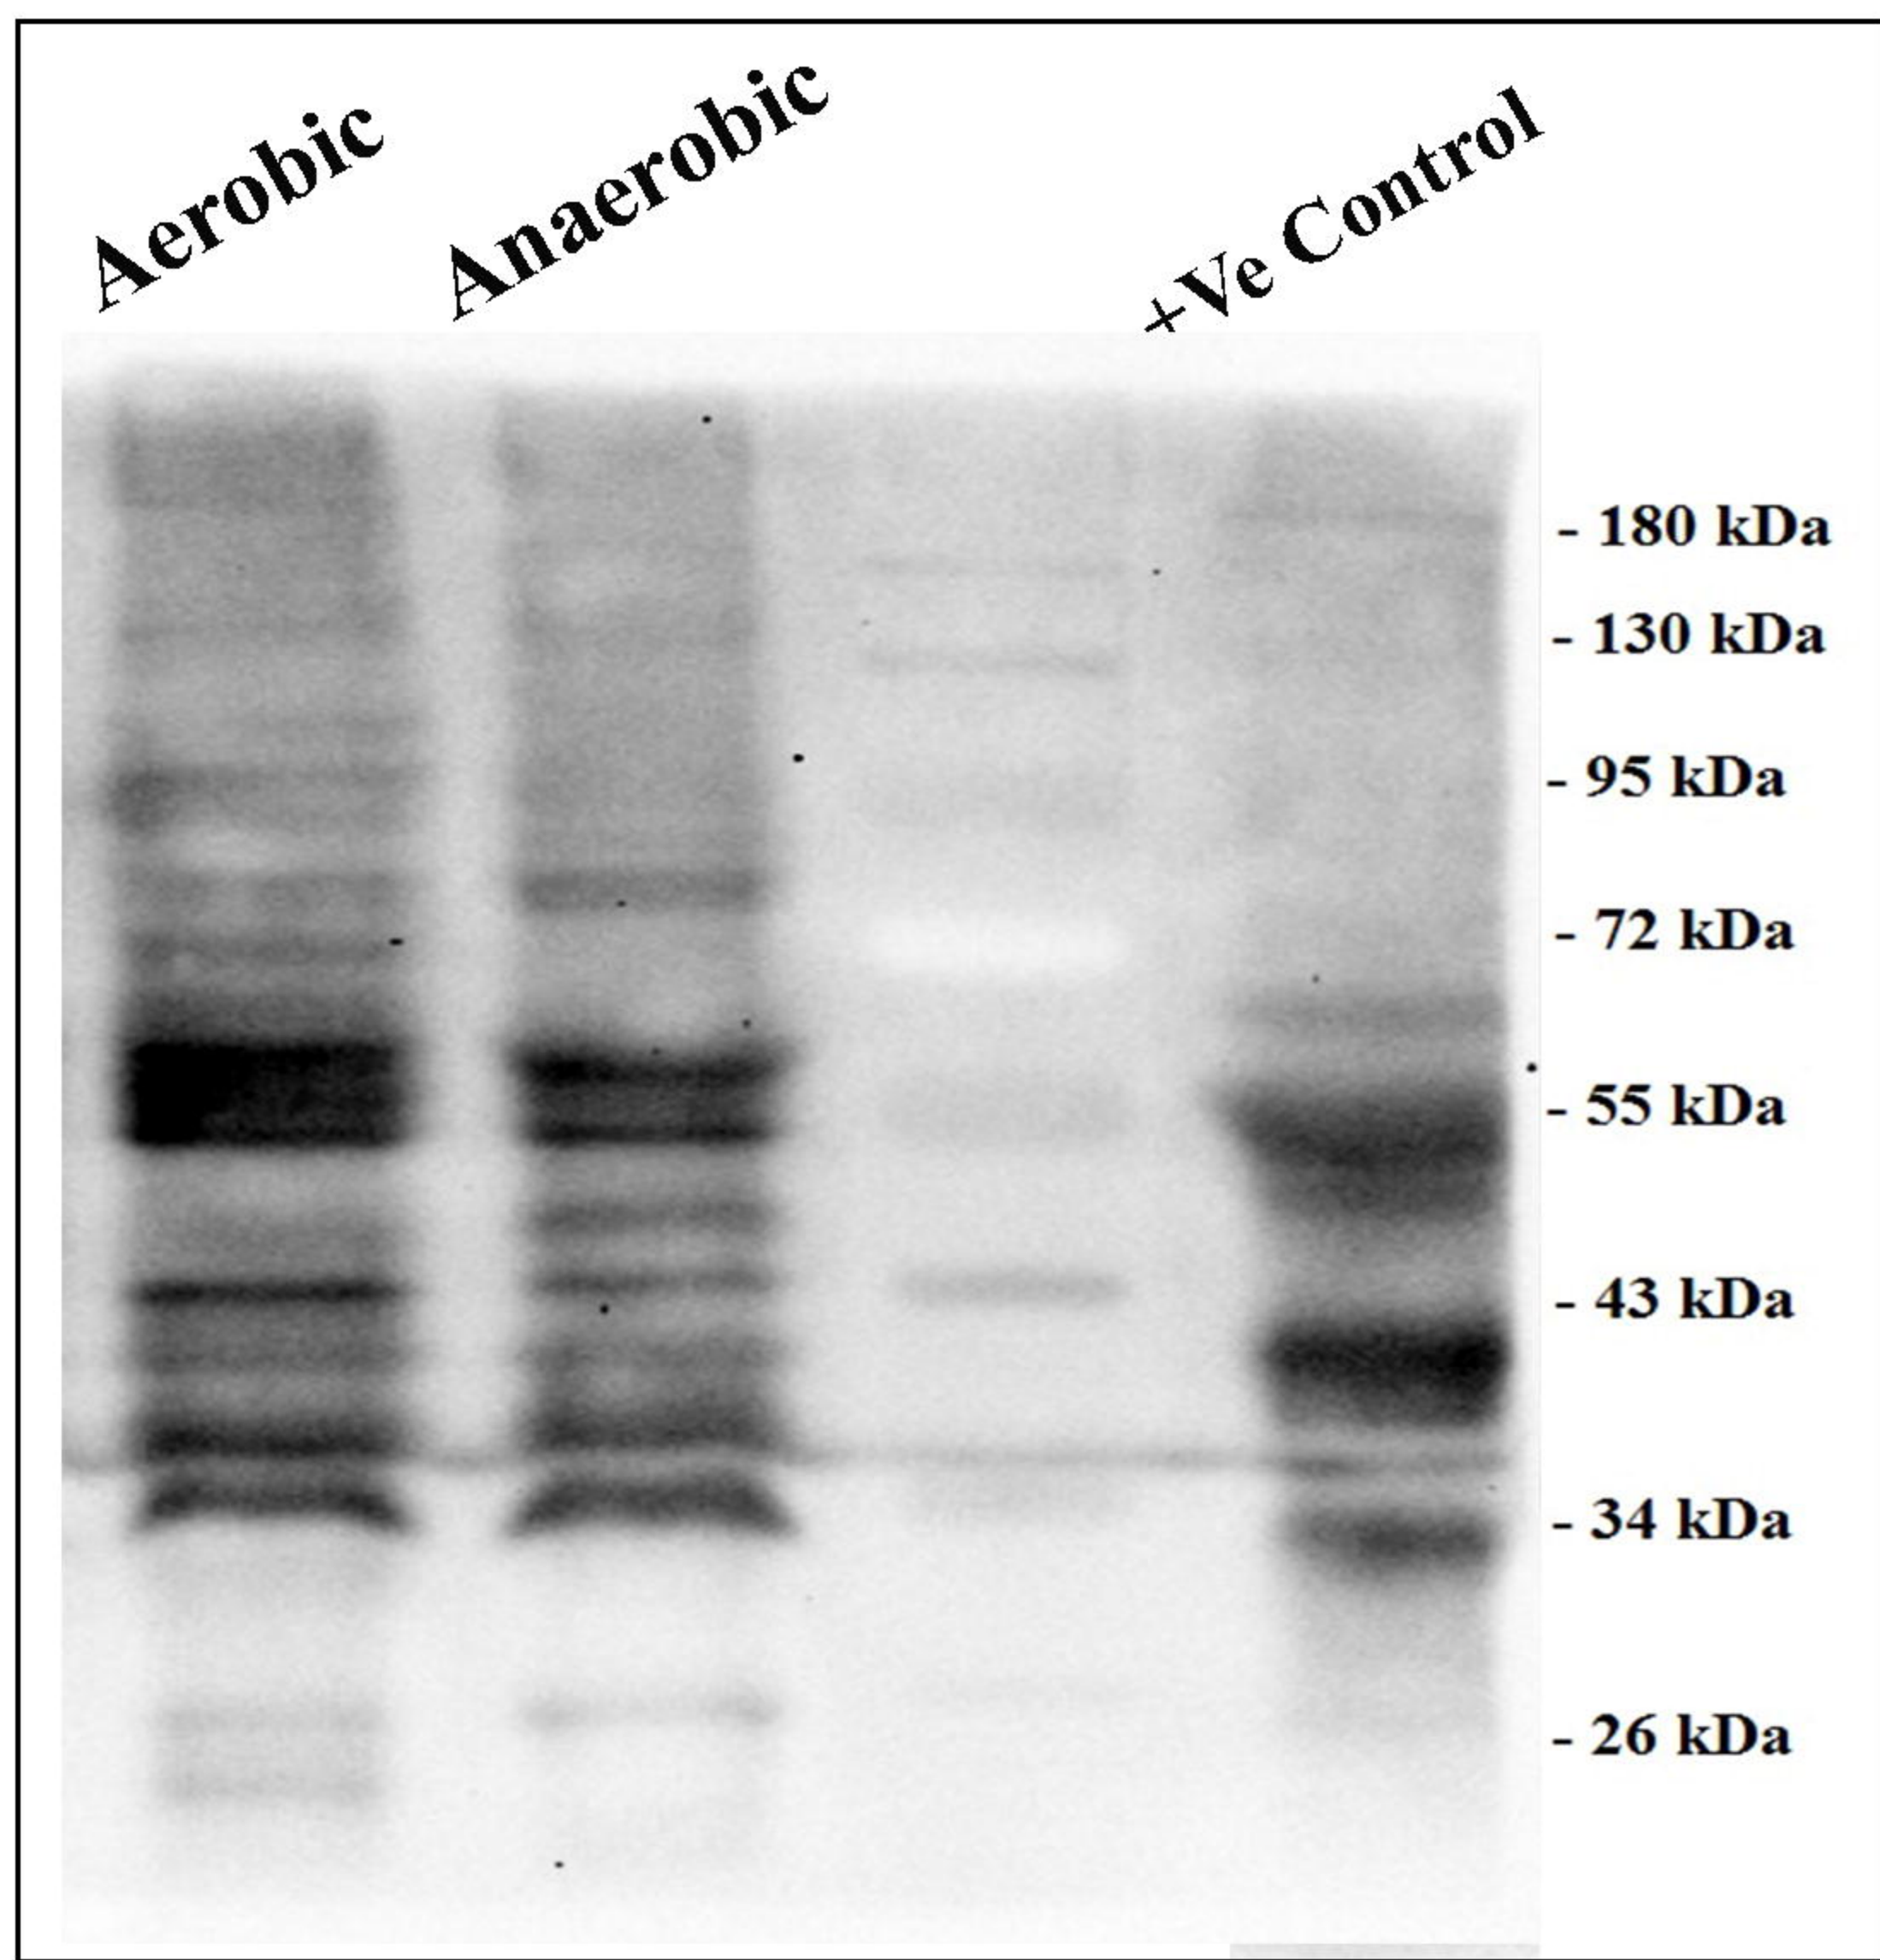

(B)

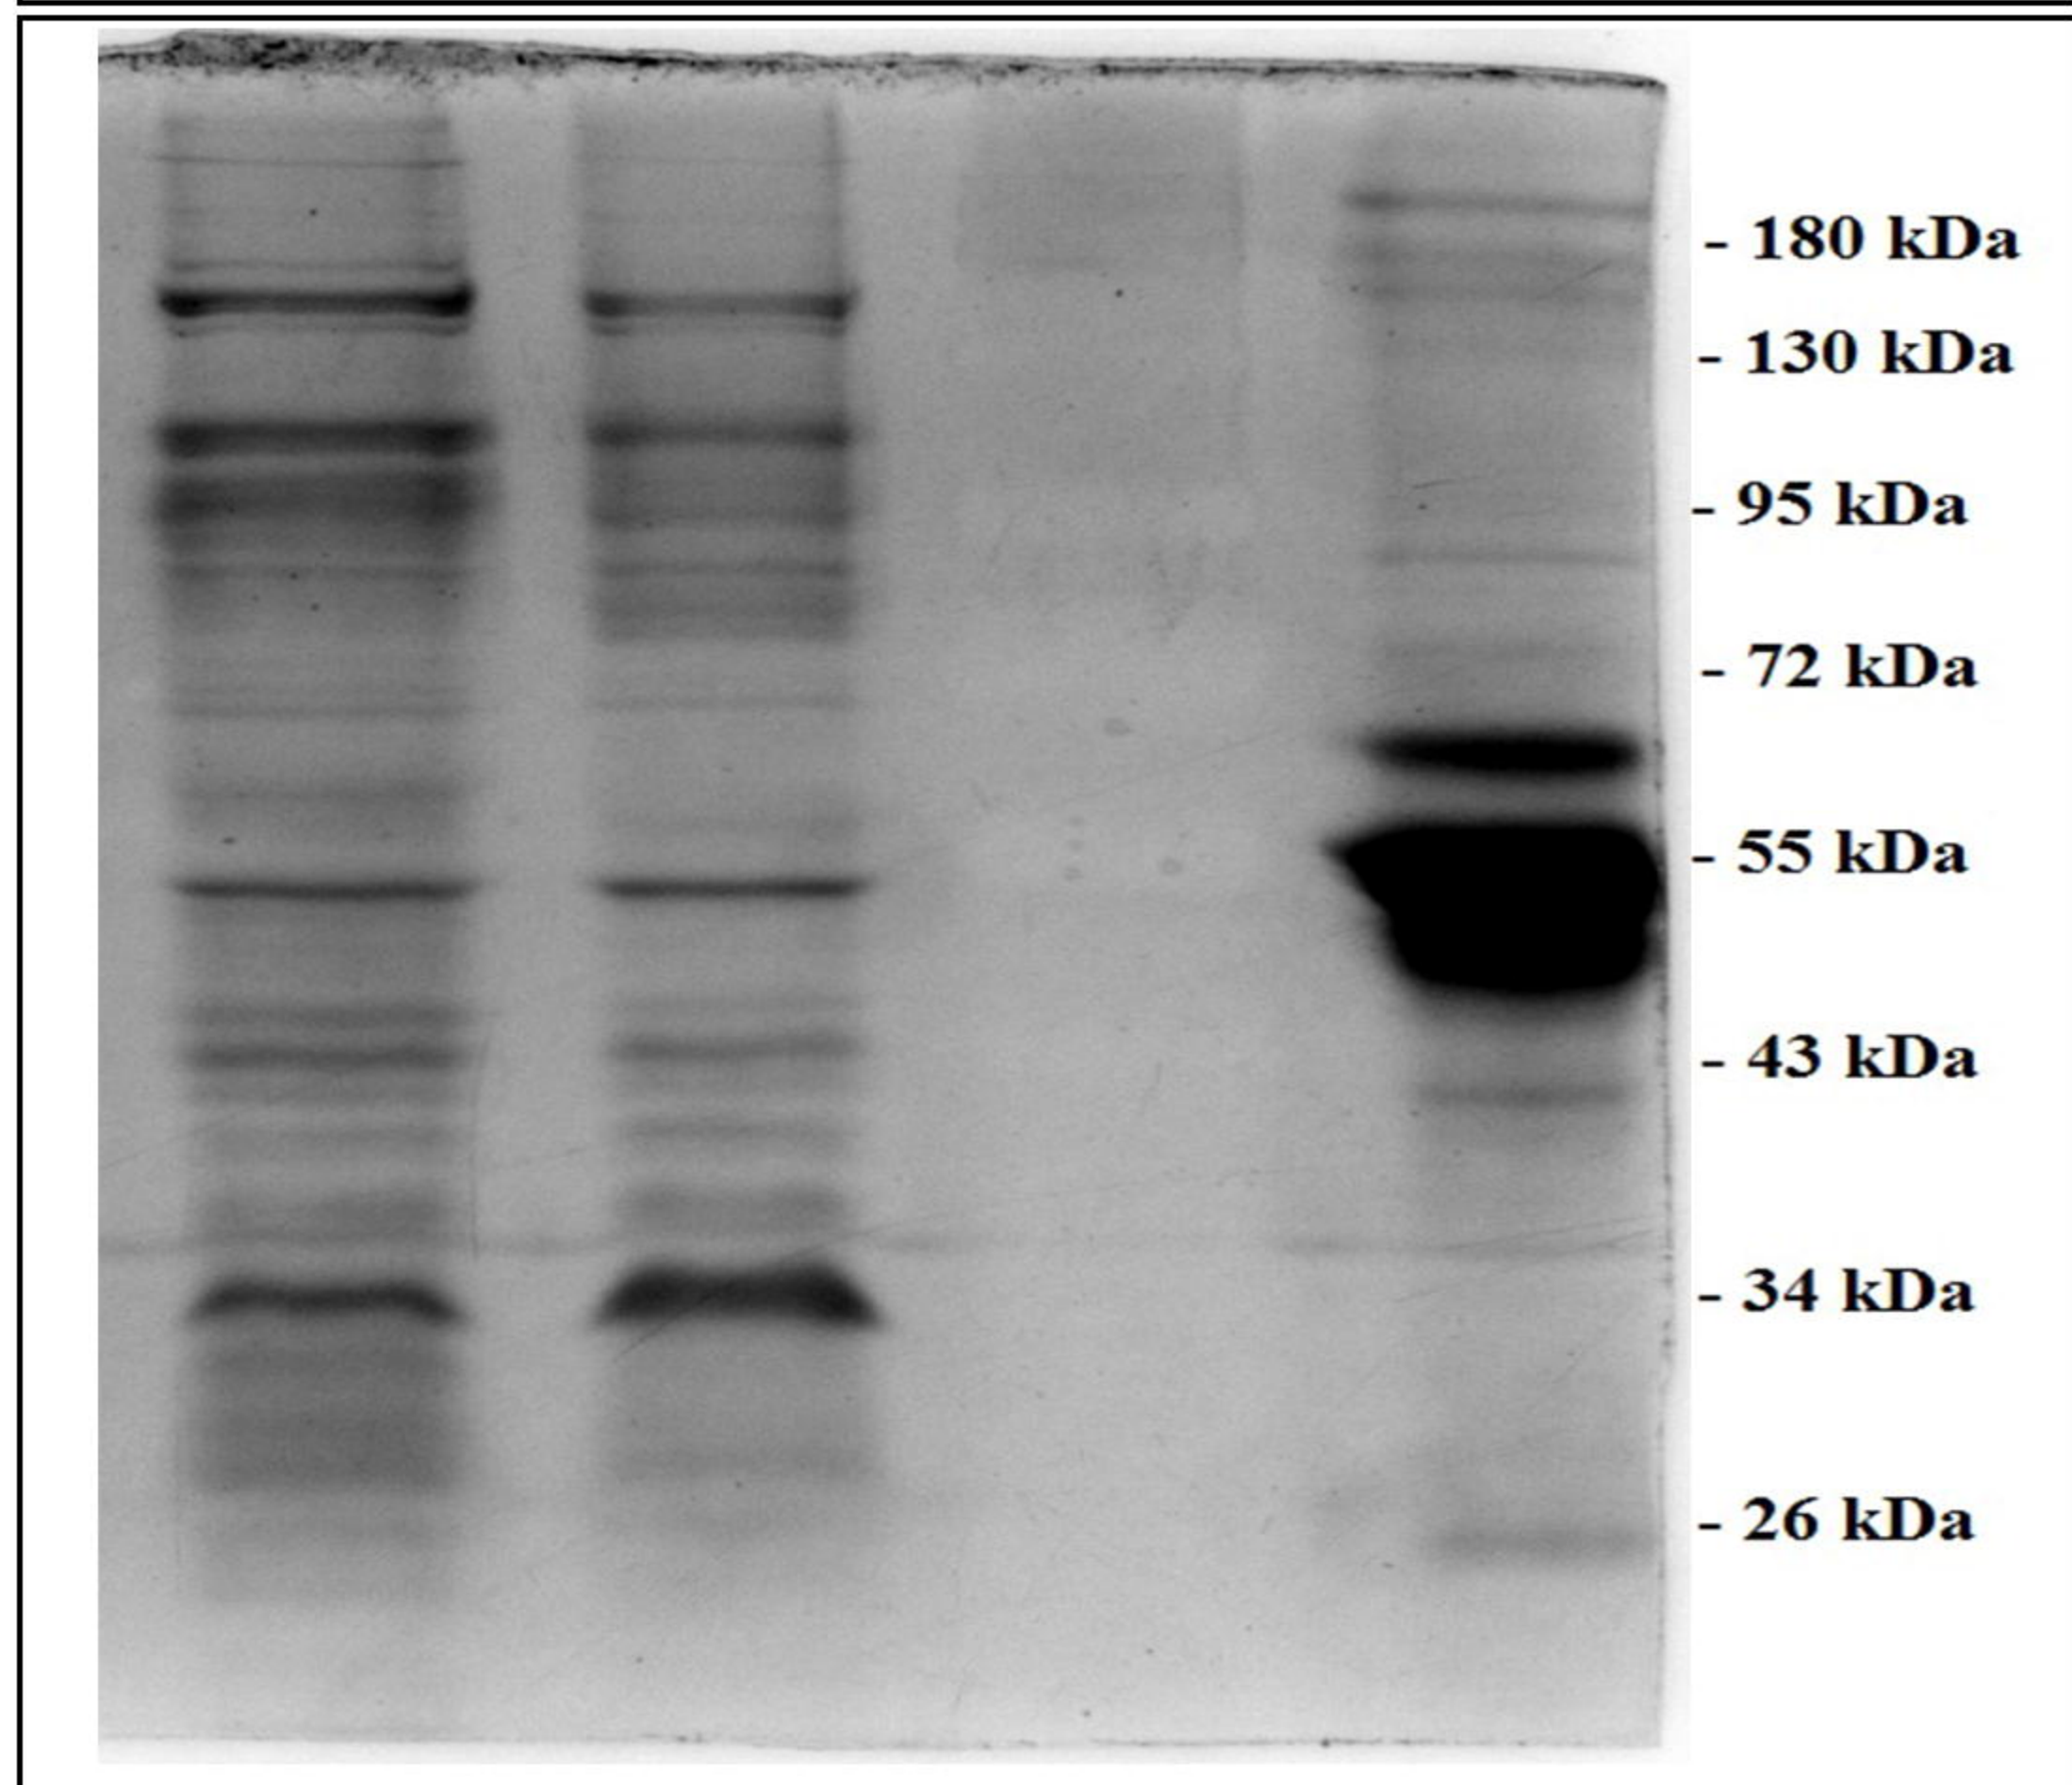

(C)

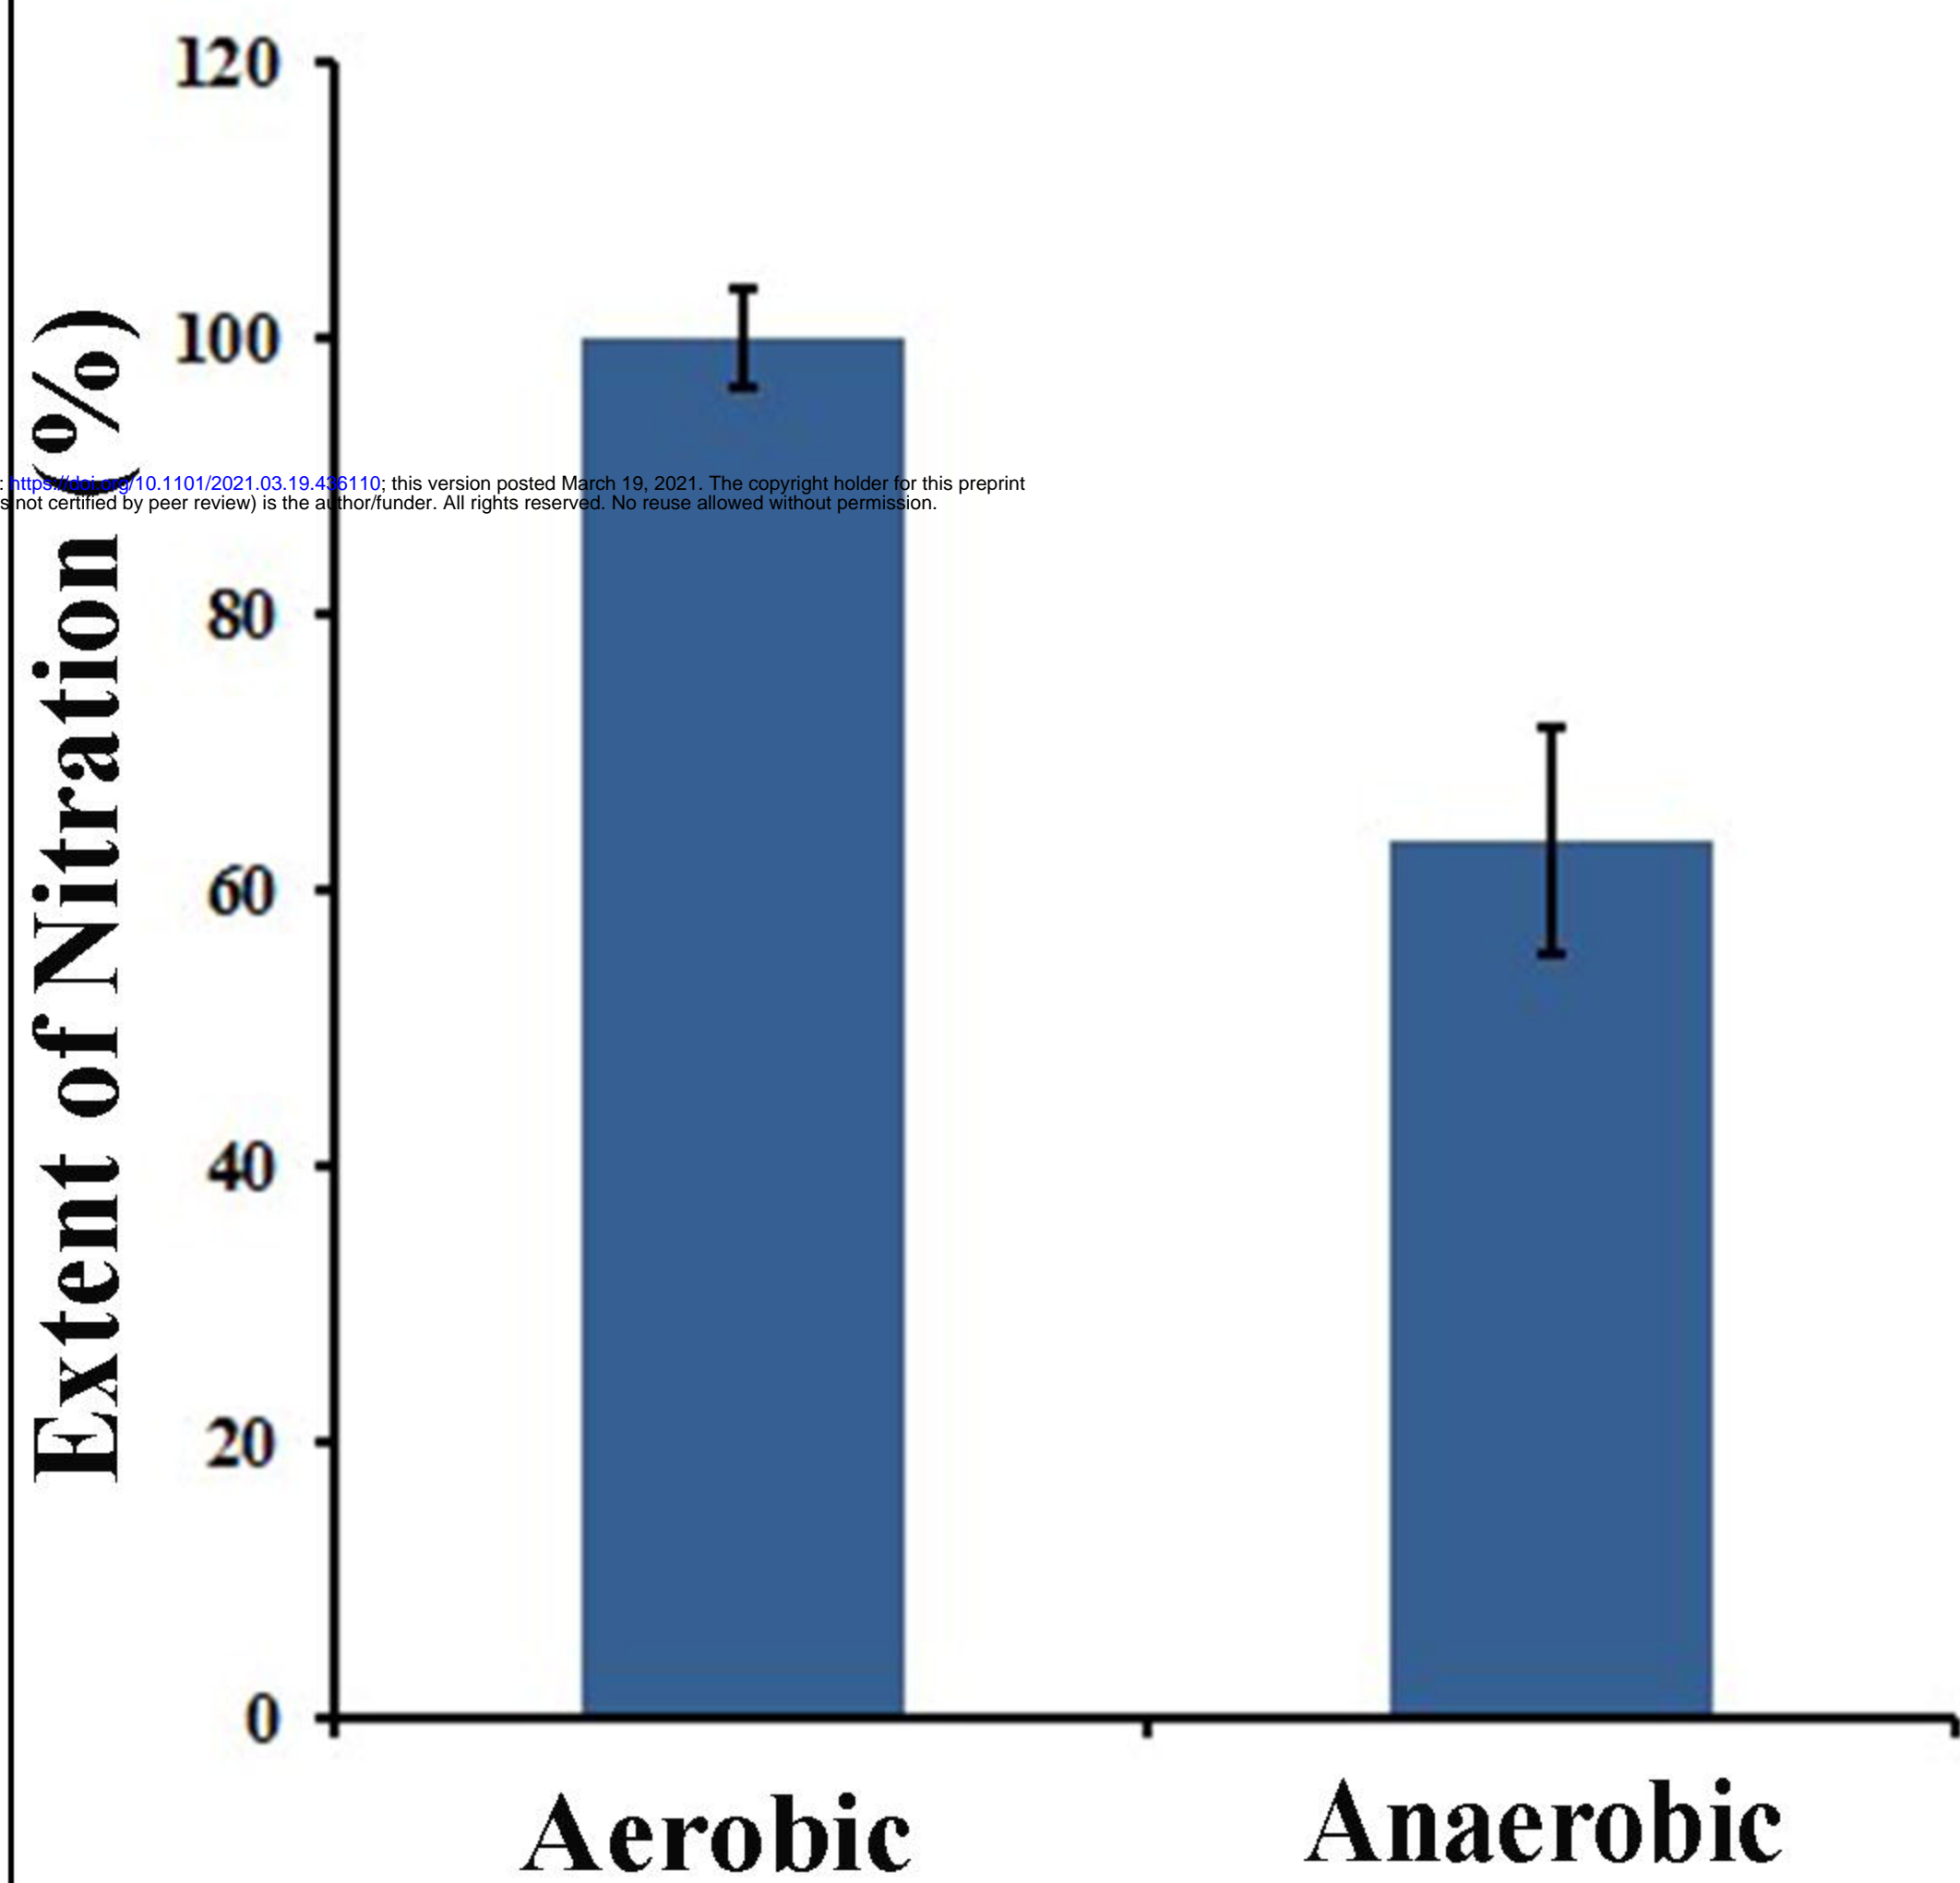

Figure 6

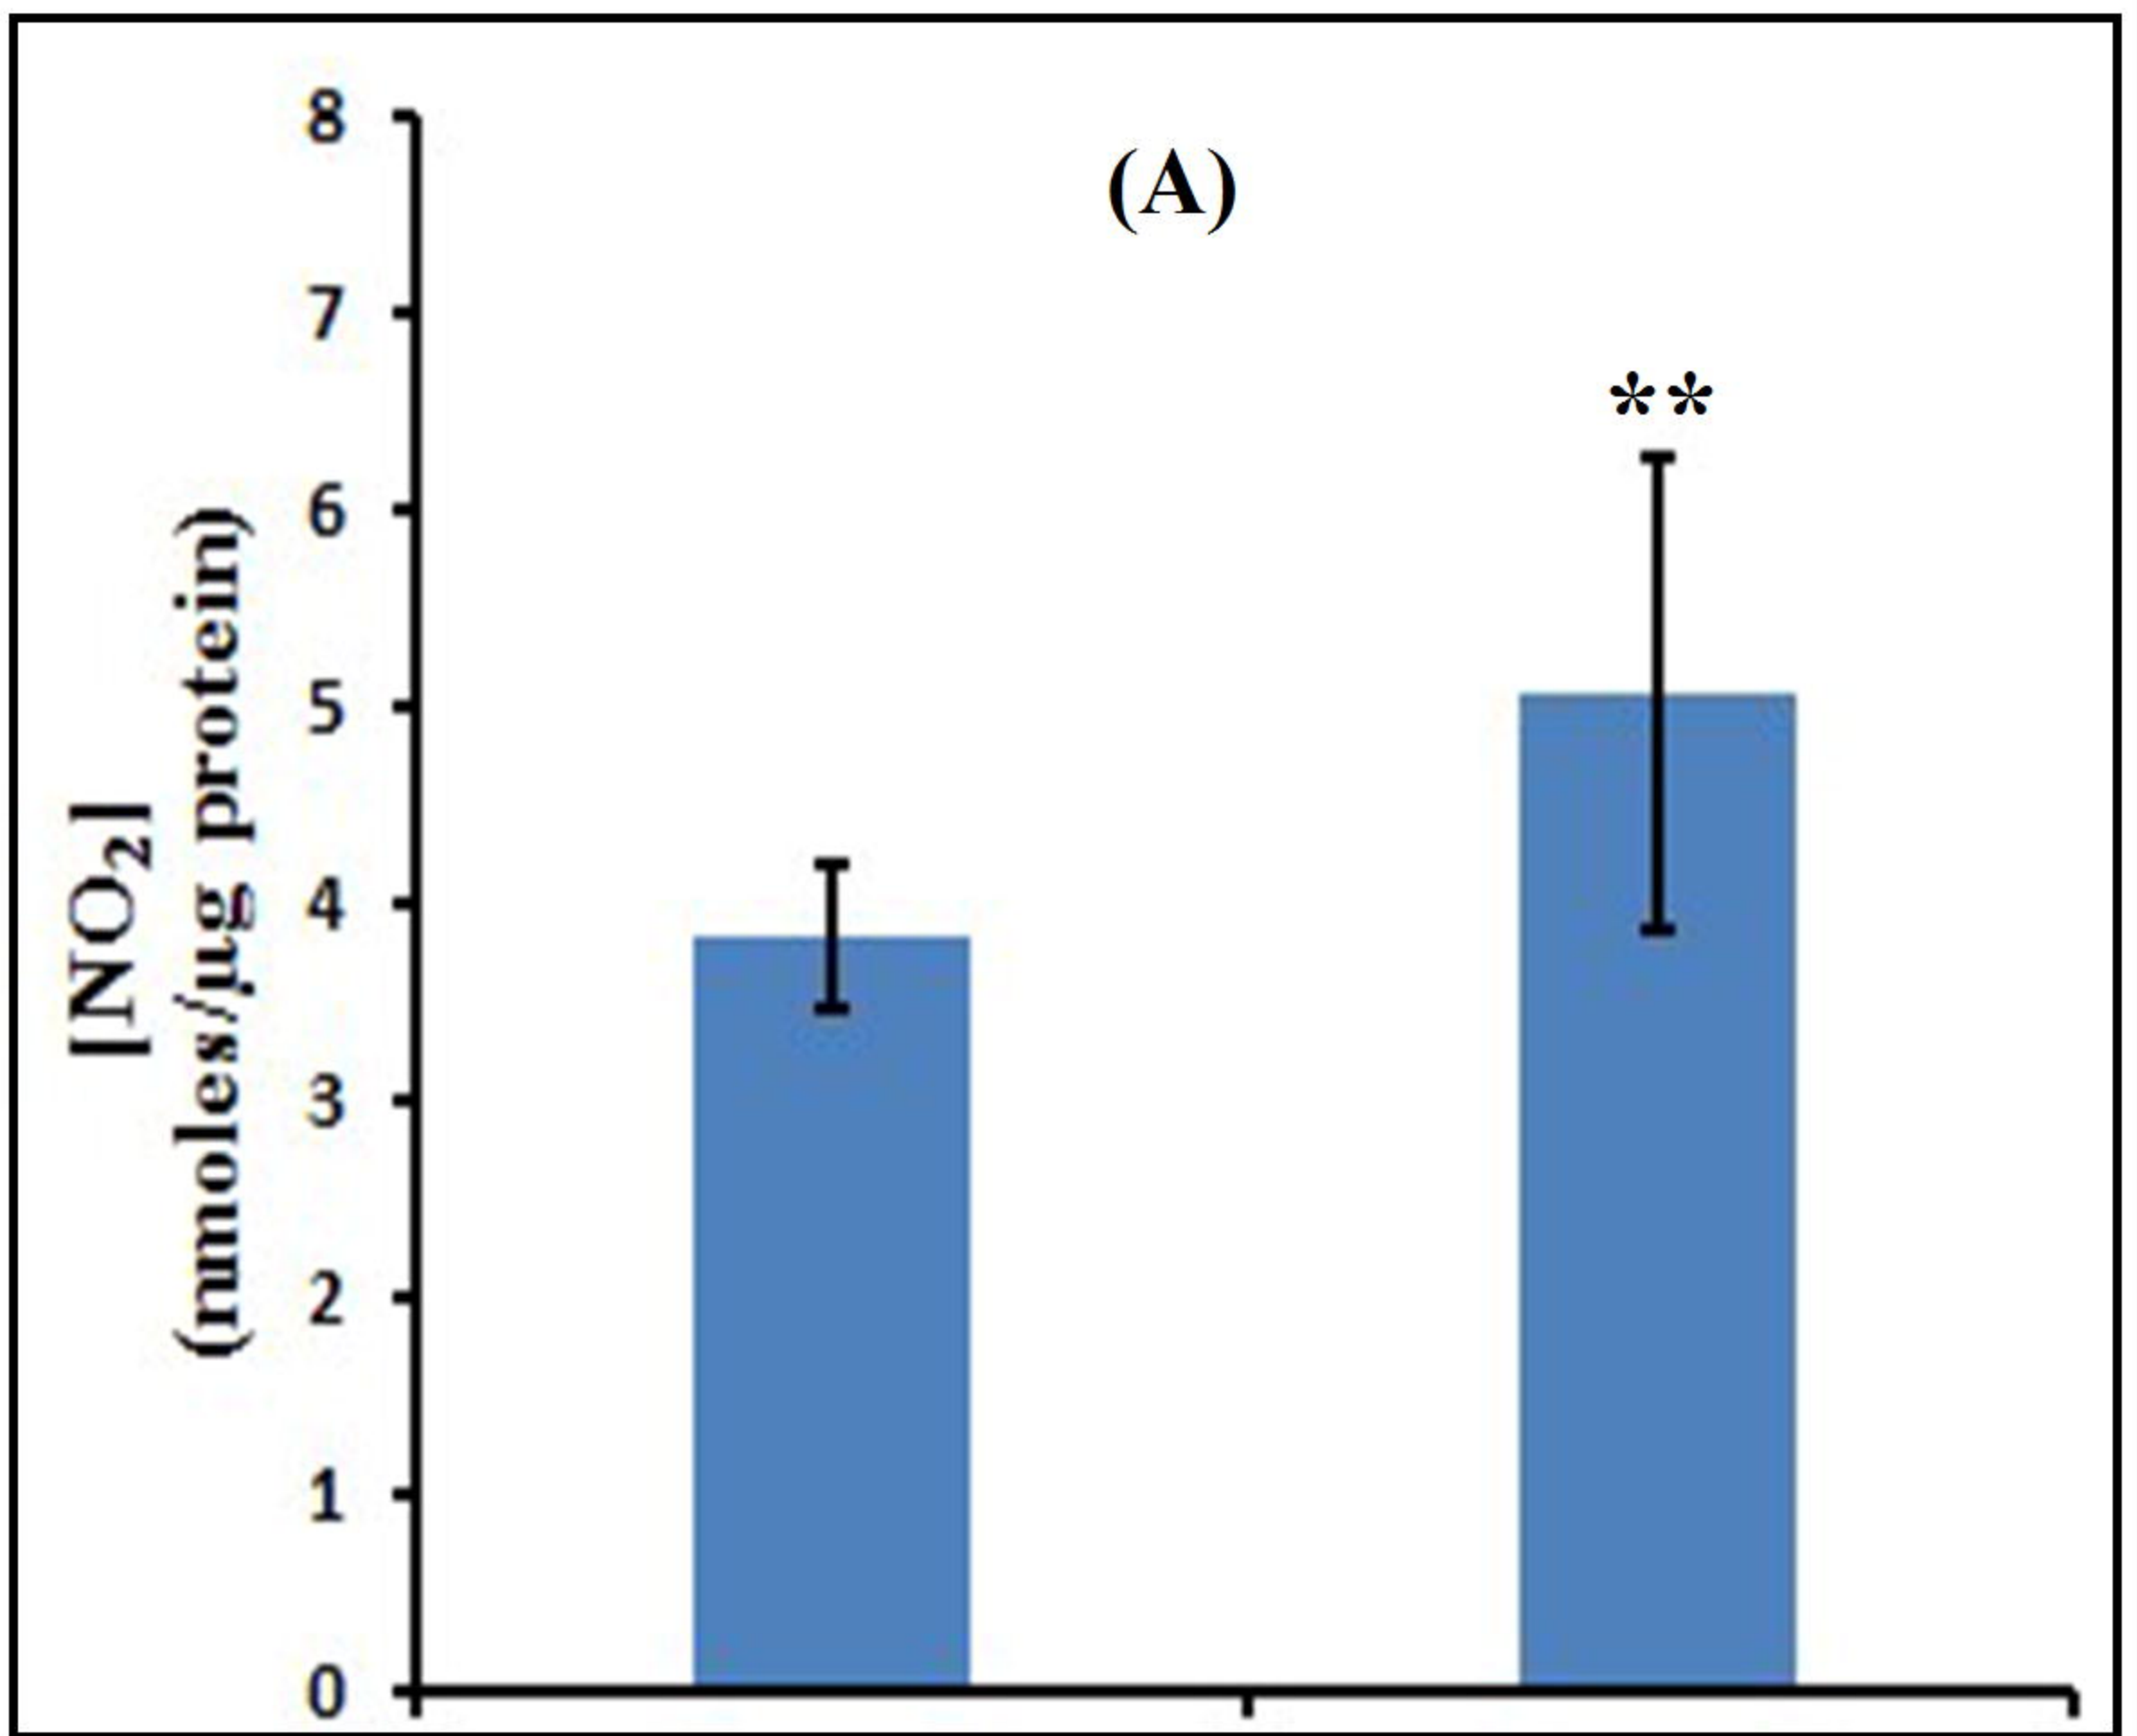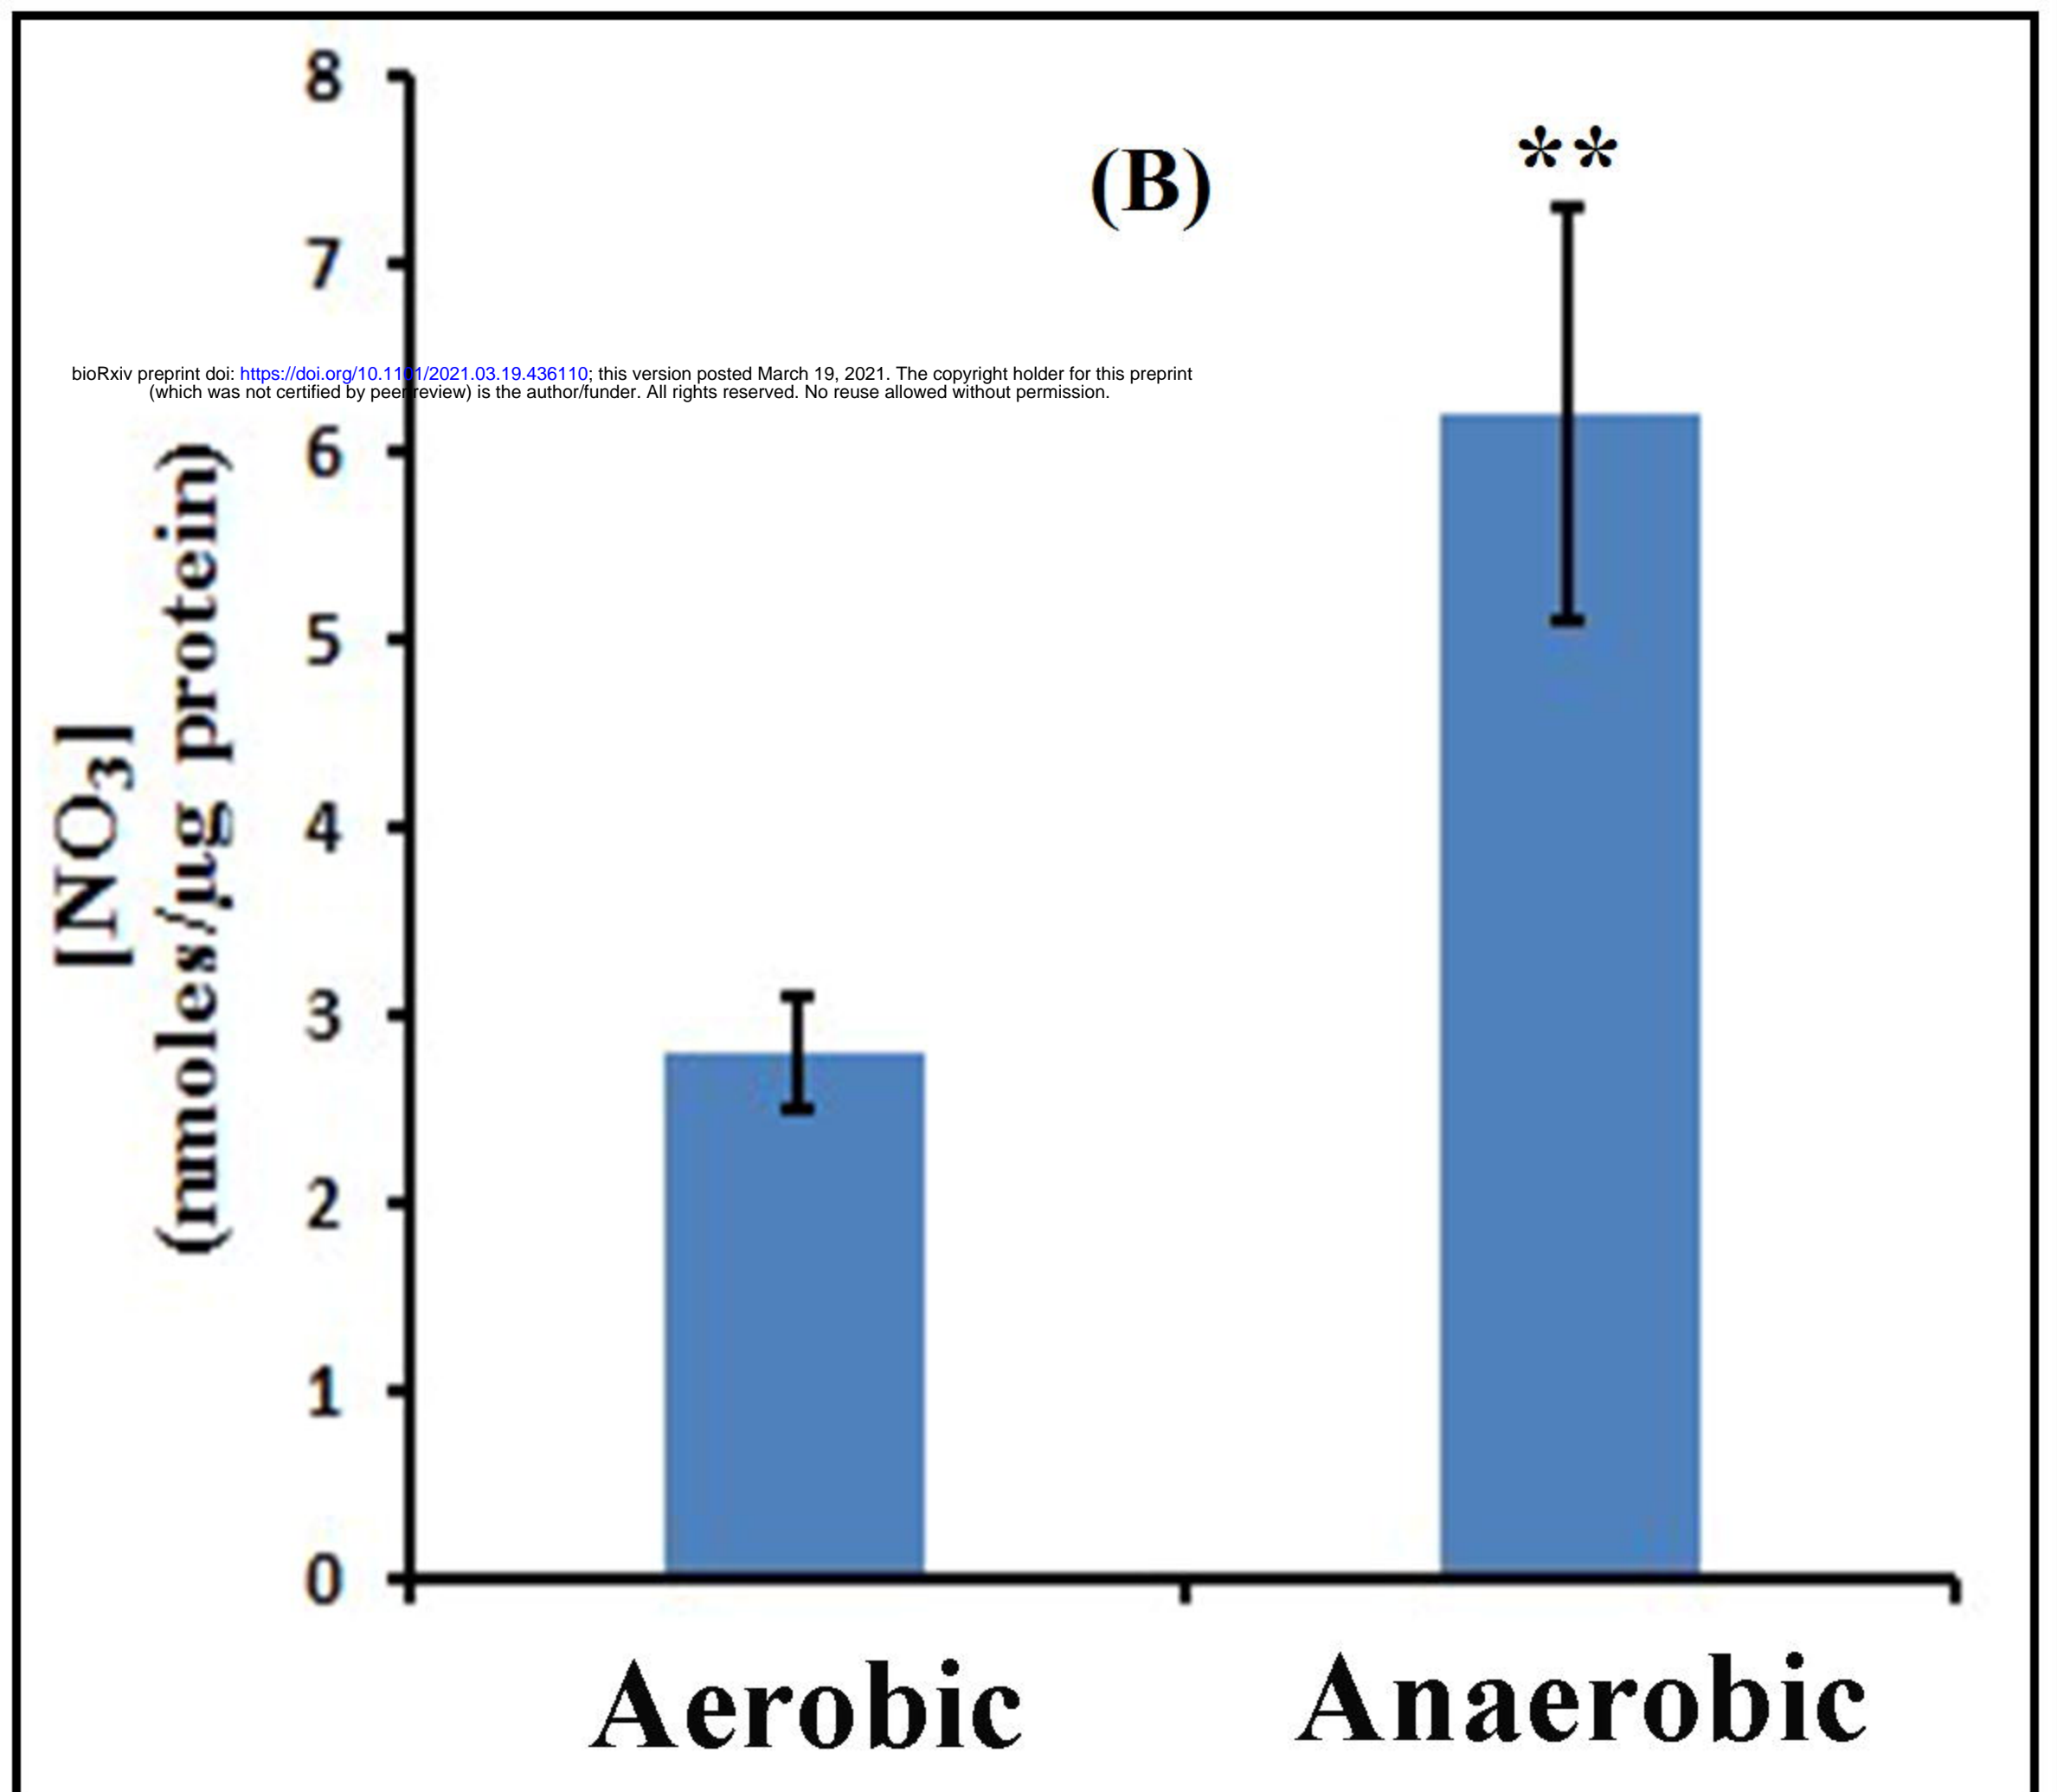

bioRxiv preprint doi: <https://doi.org/10.1101/2021.03.19.436110>; this version posted March 19, 2021. The copyright holder for this preprint (which was not certified by peer review) is the author/funder. All rights reserved. No reuse allowed without permission.

**Figure 7**

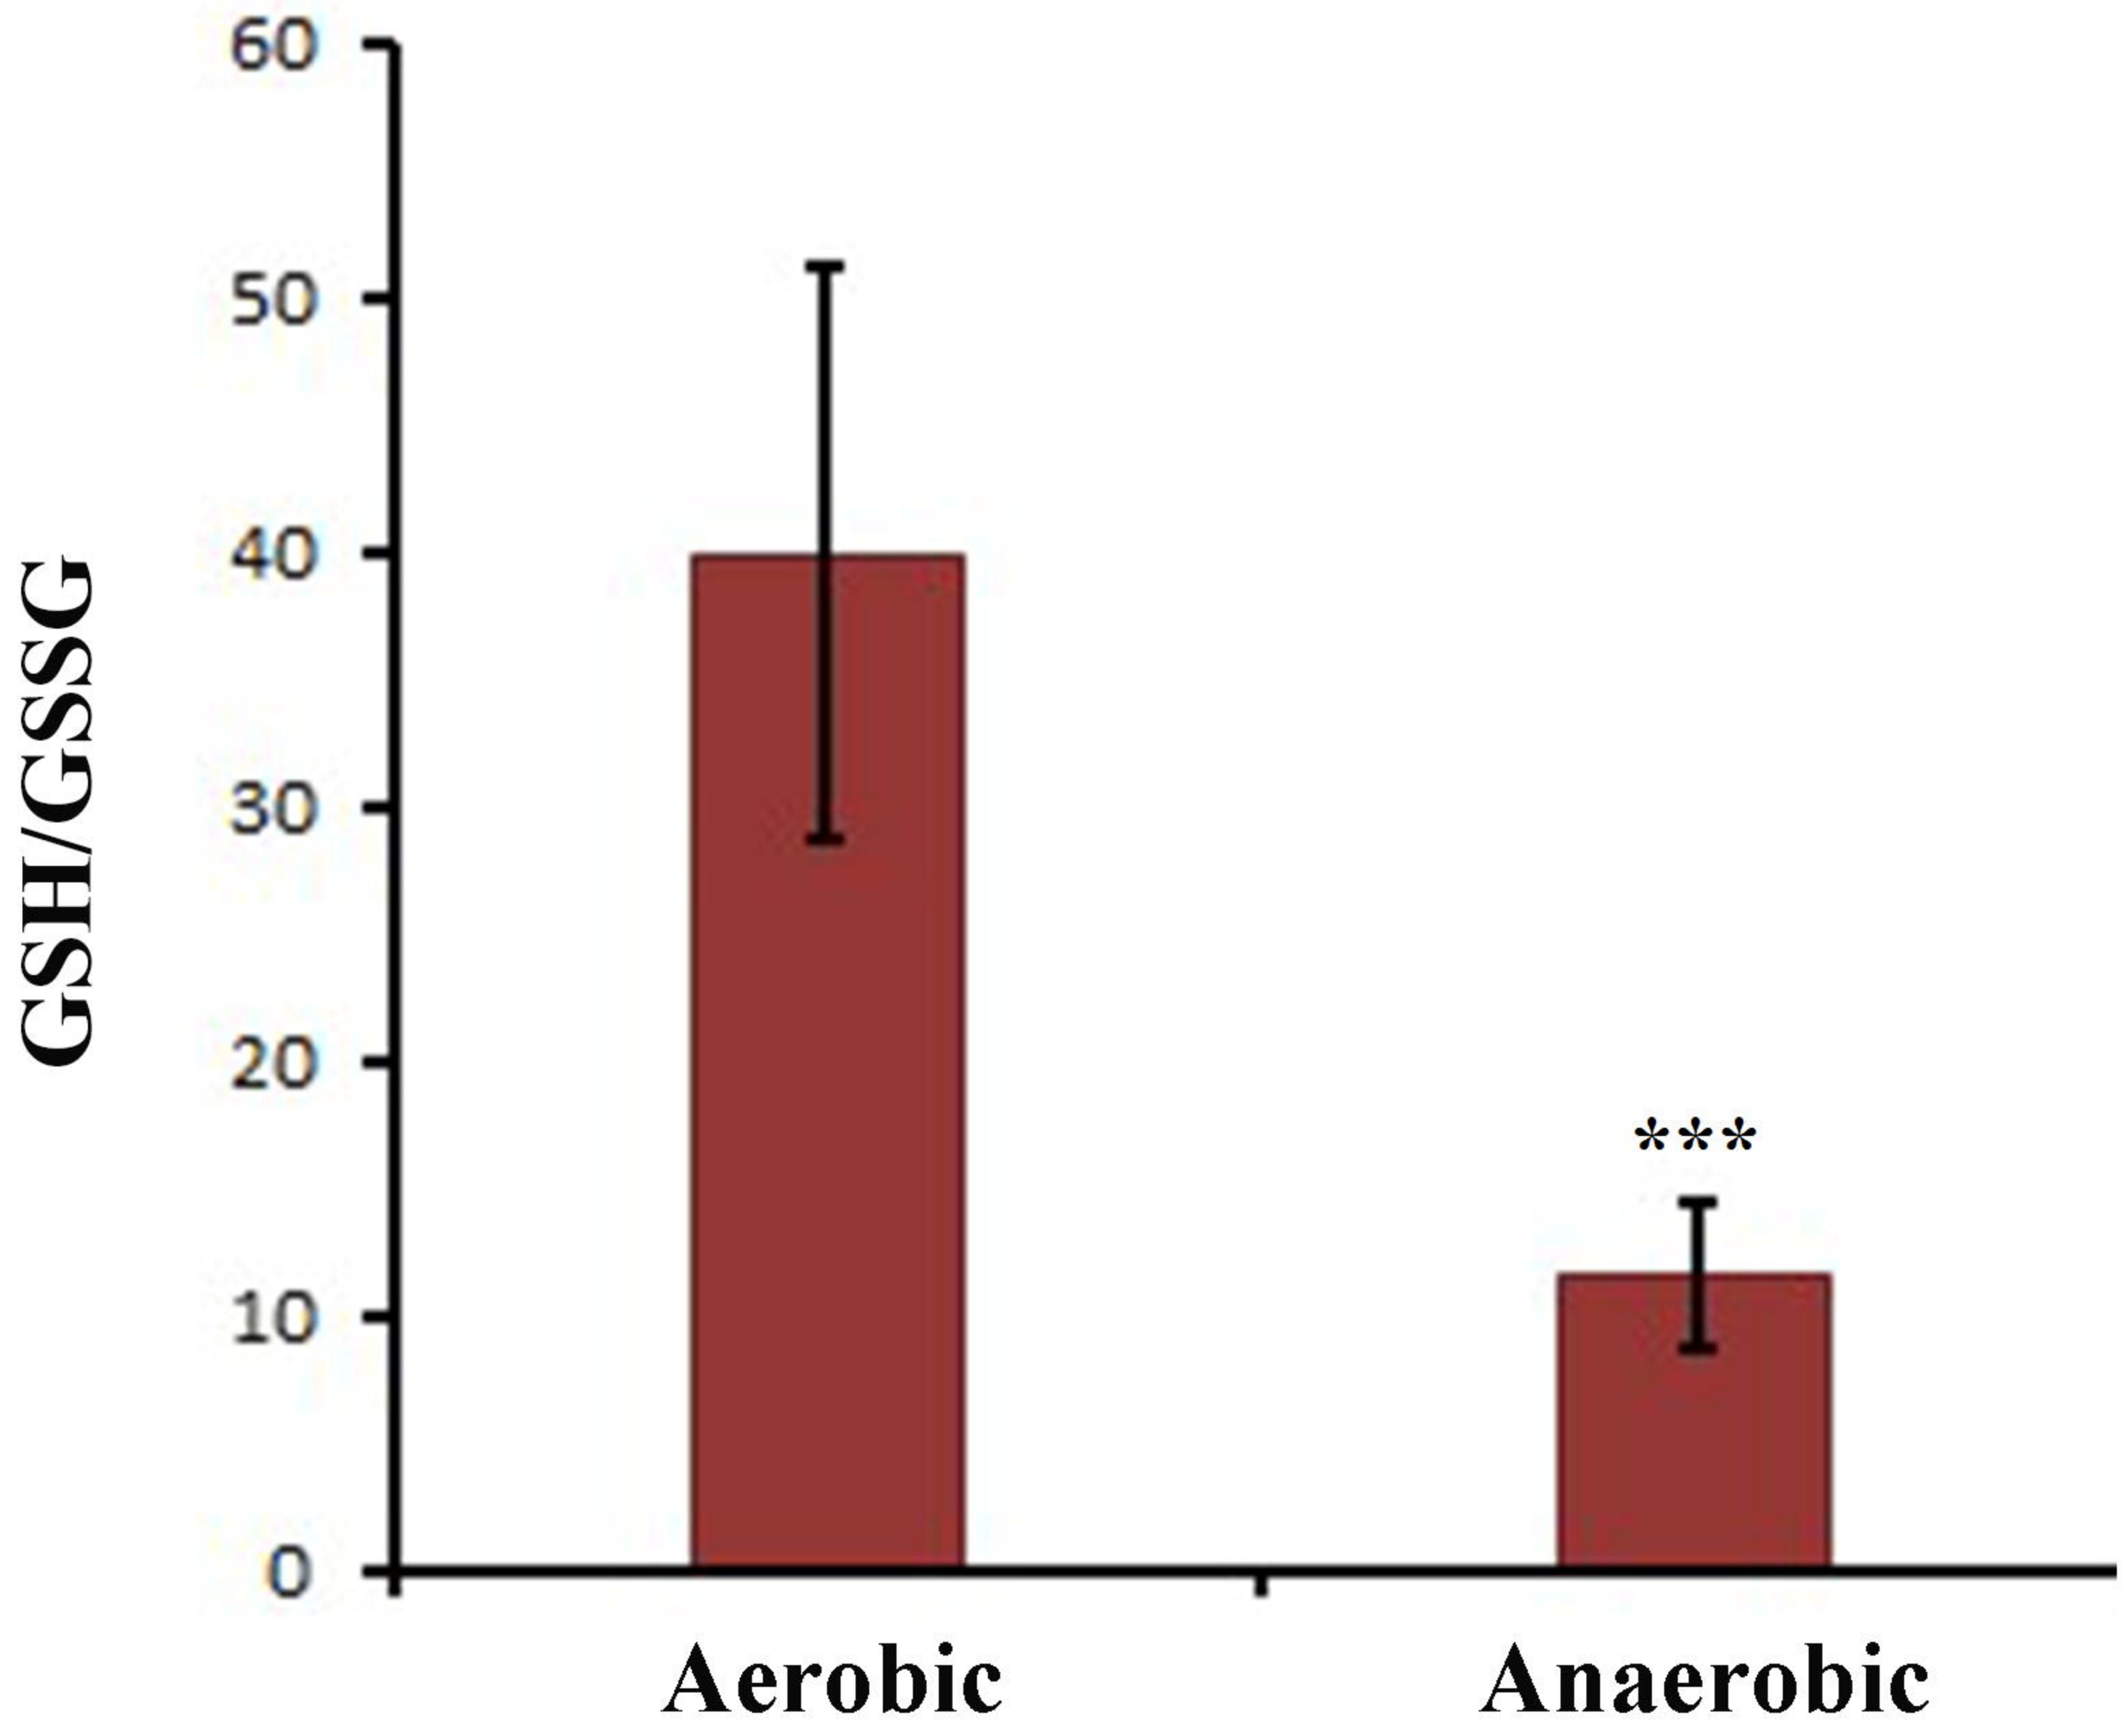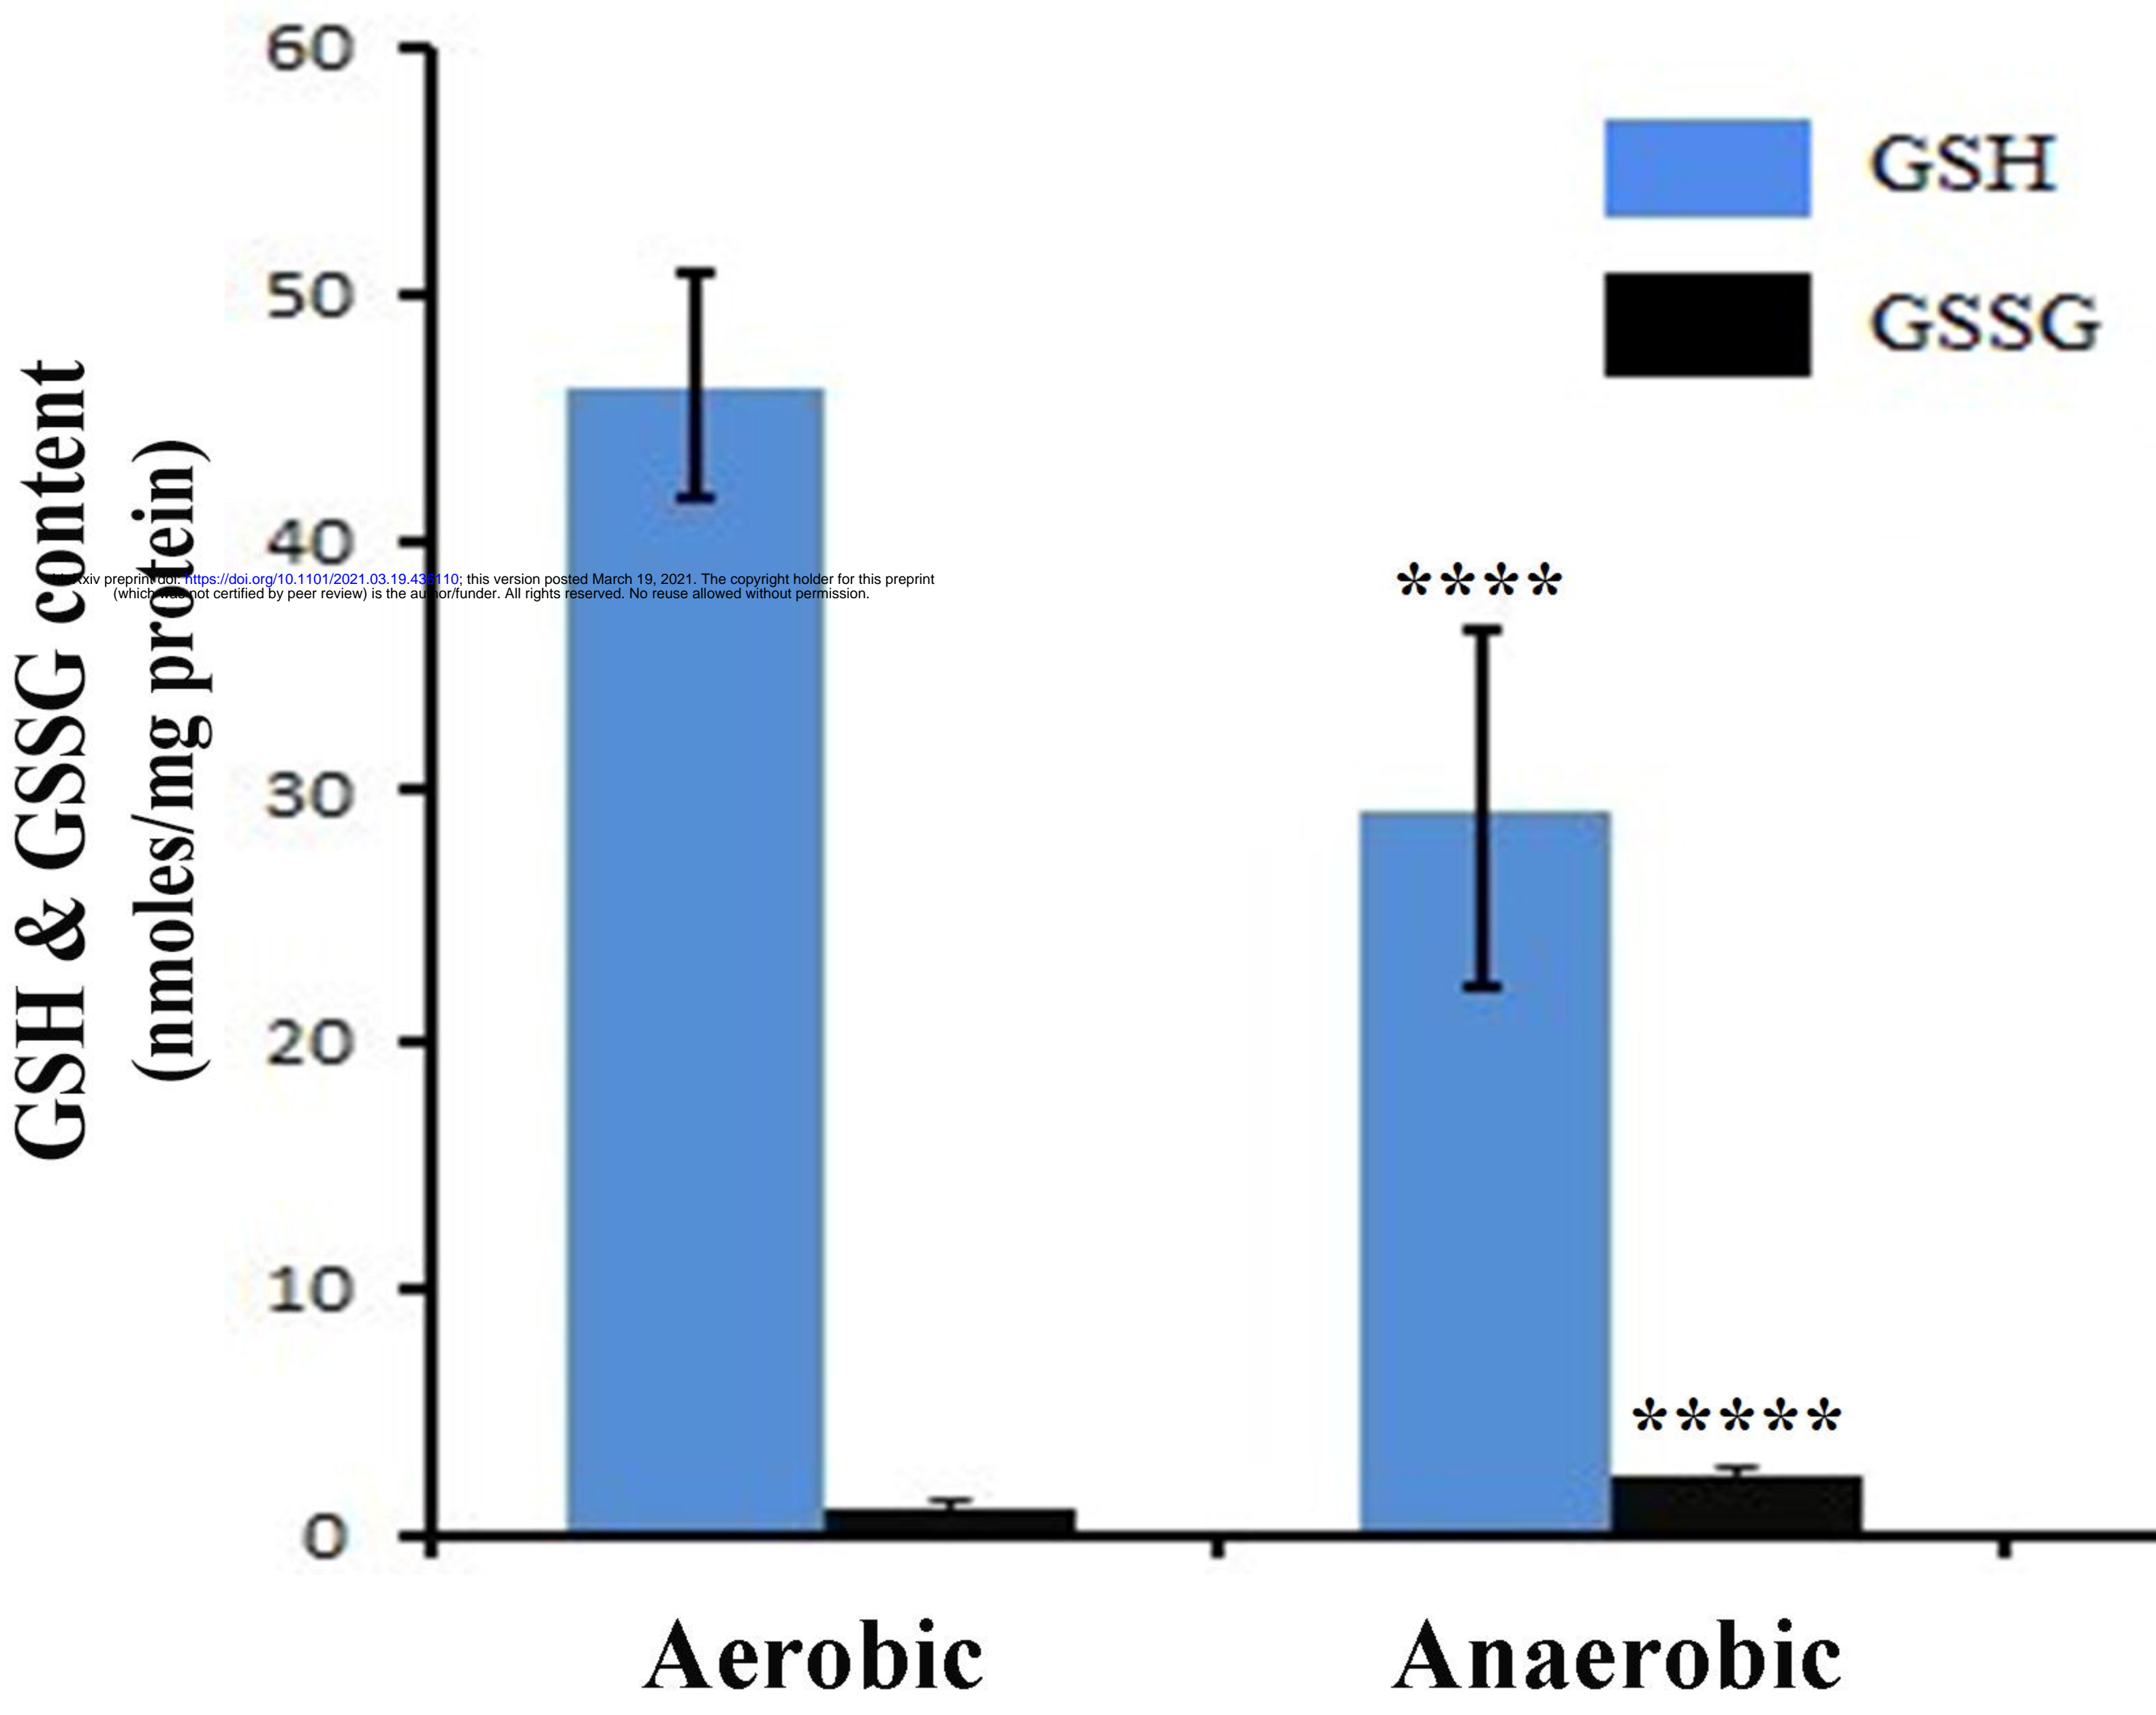

**Figure 8**

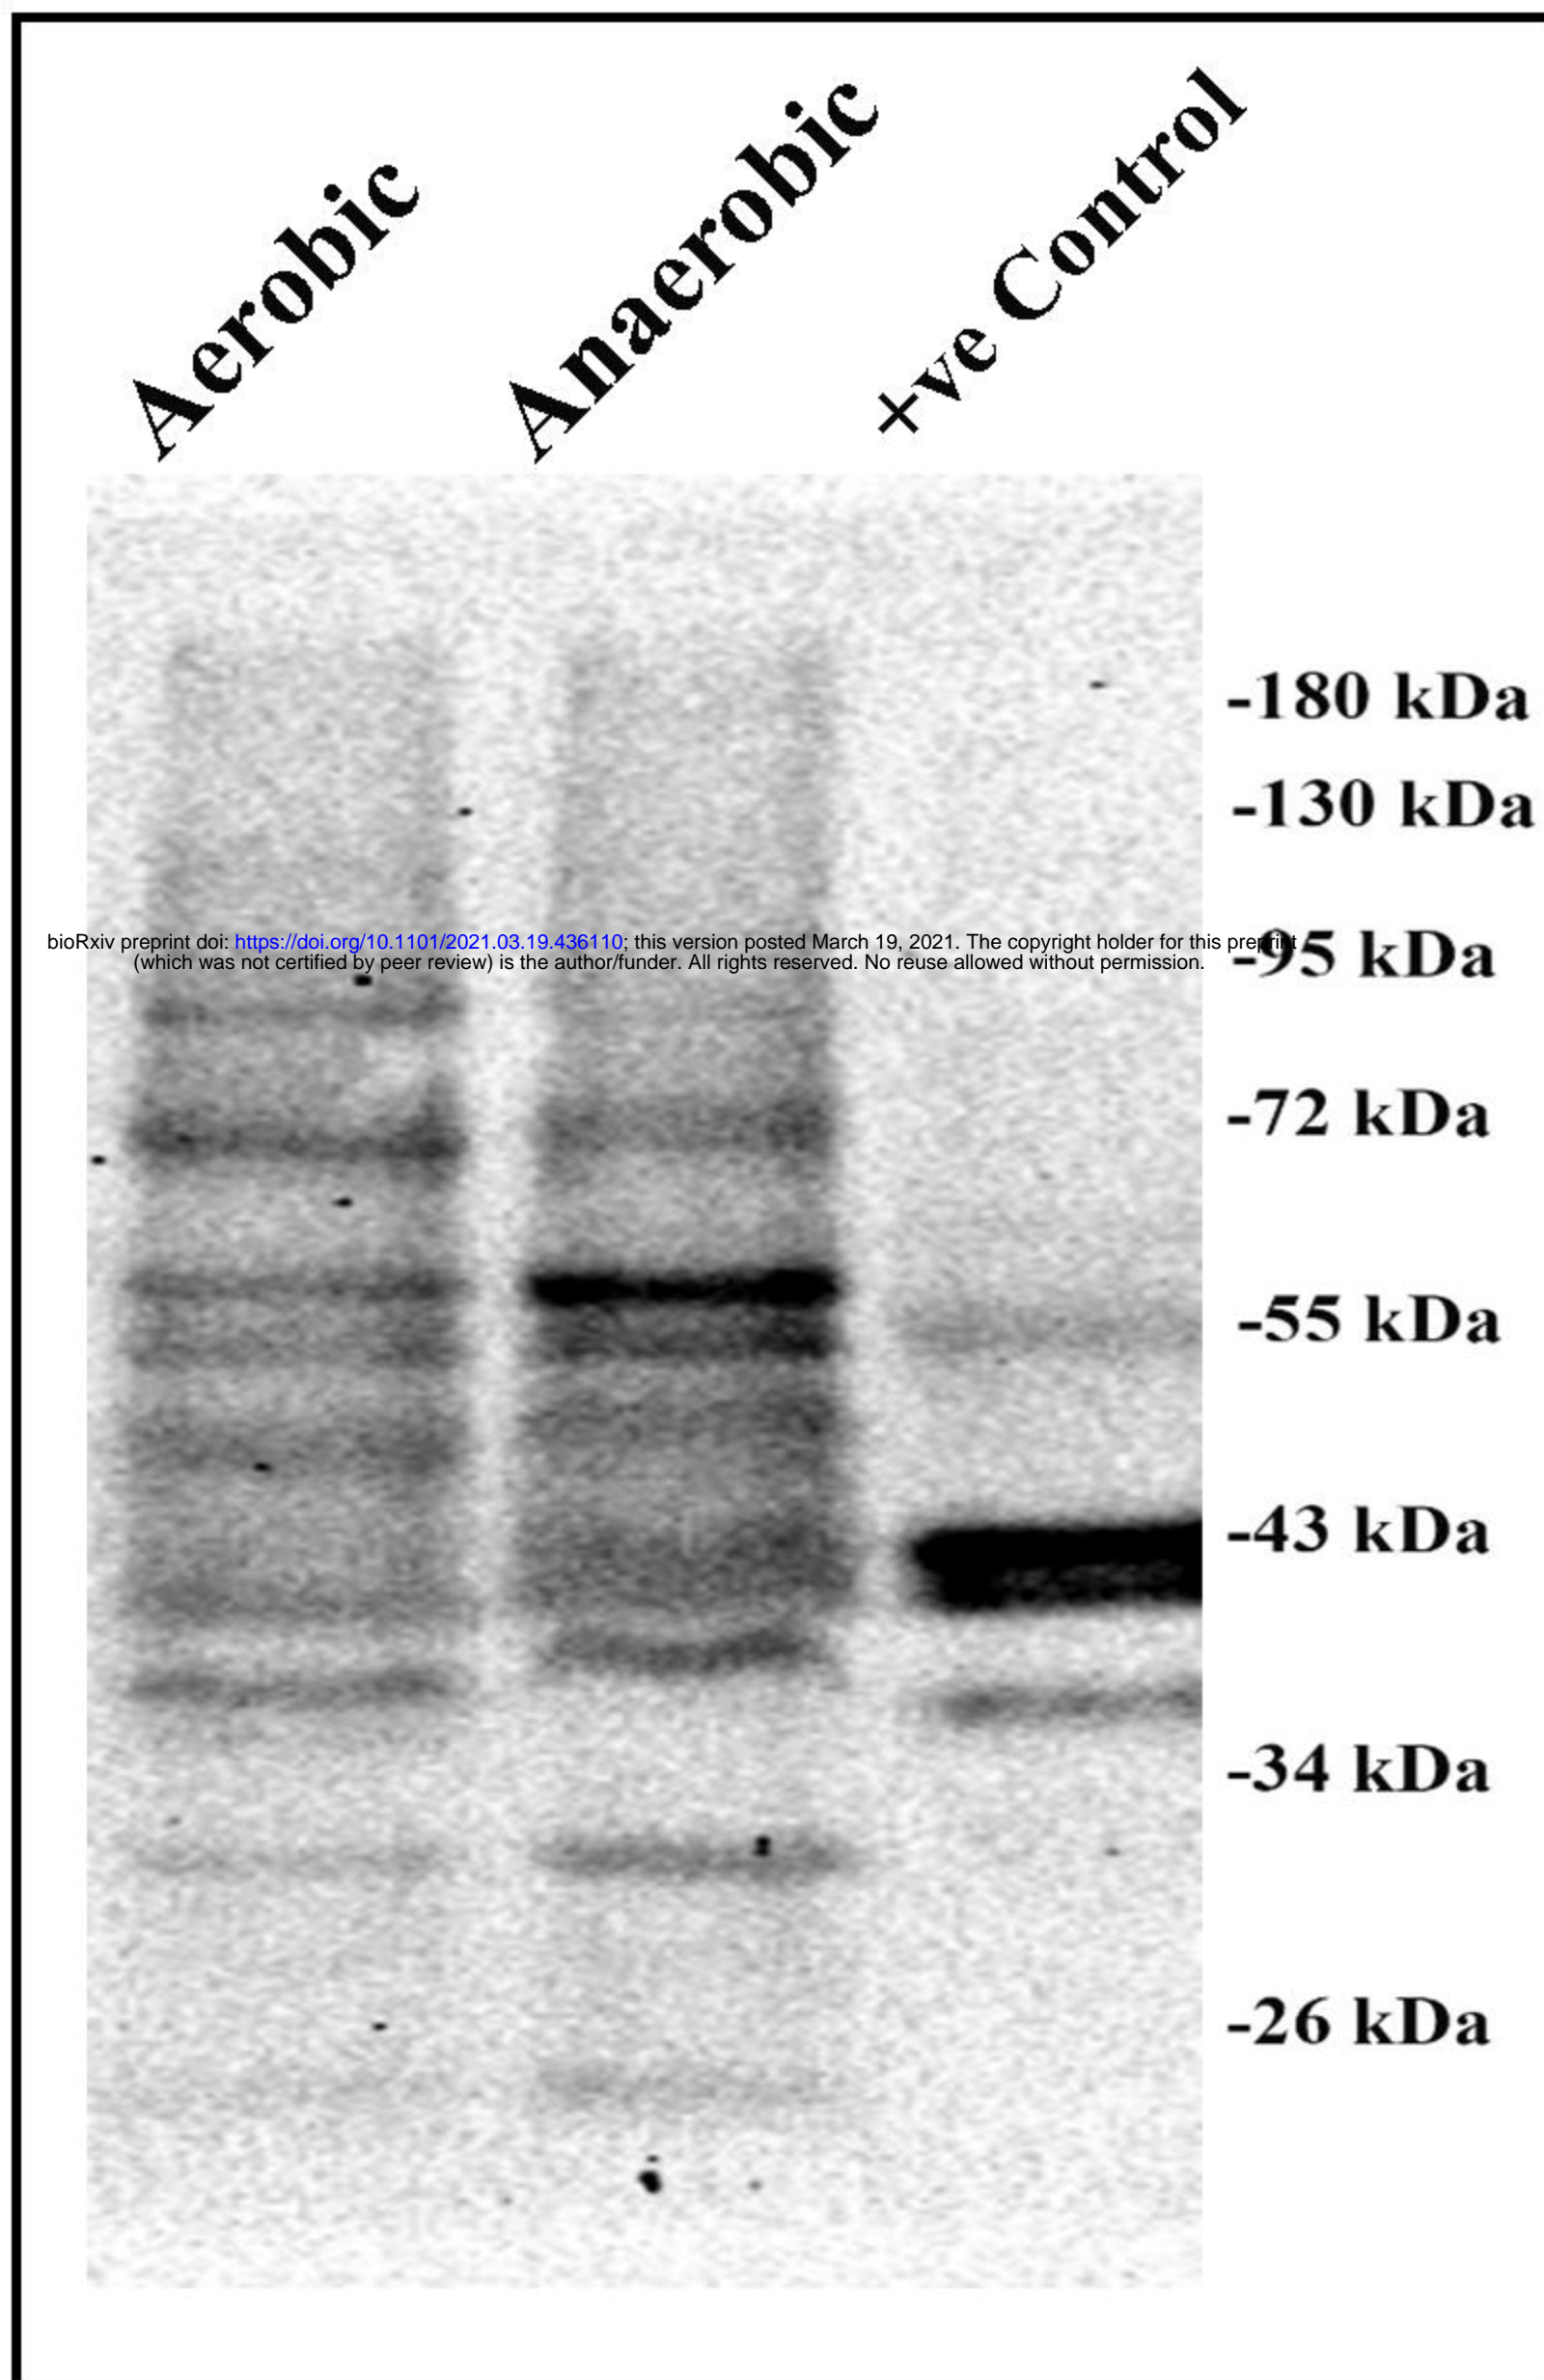

**Western Blot**

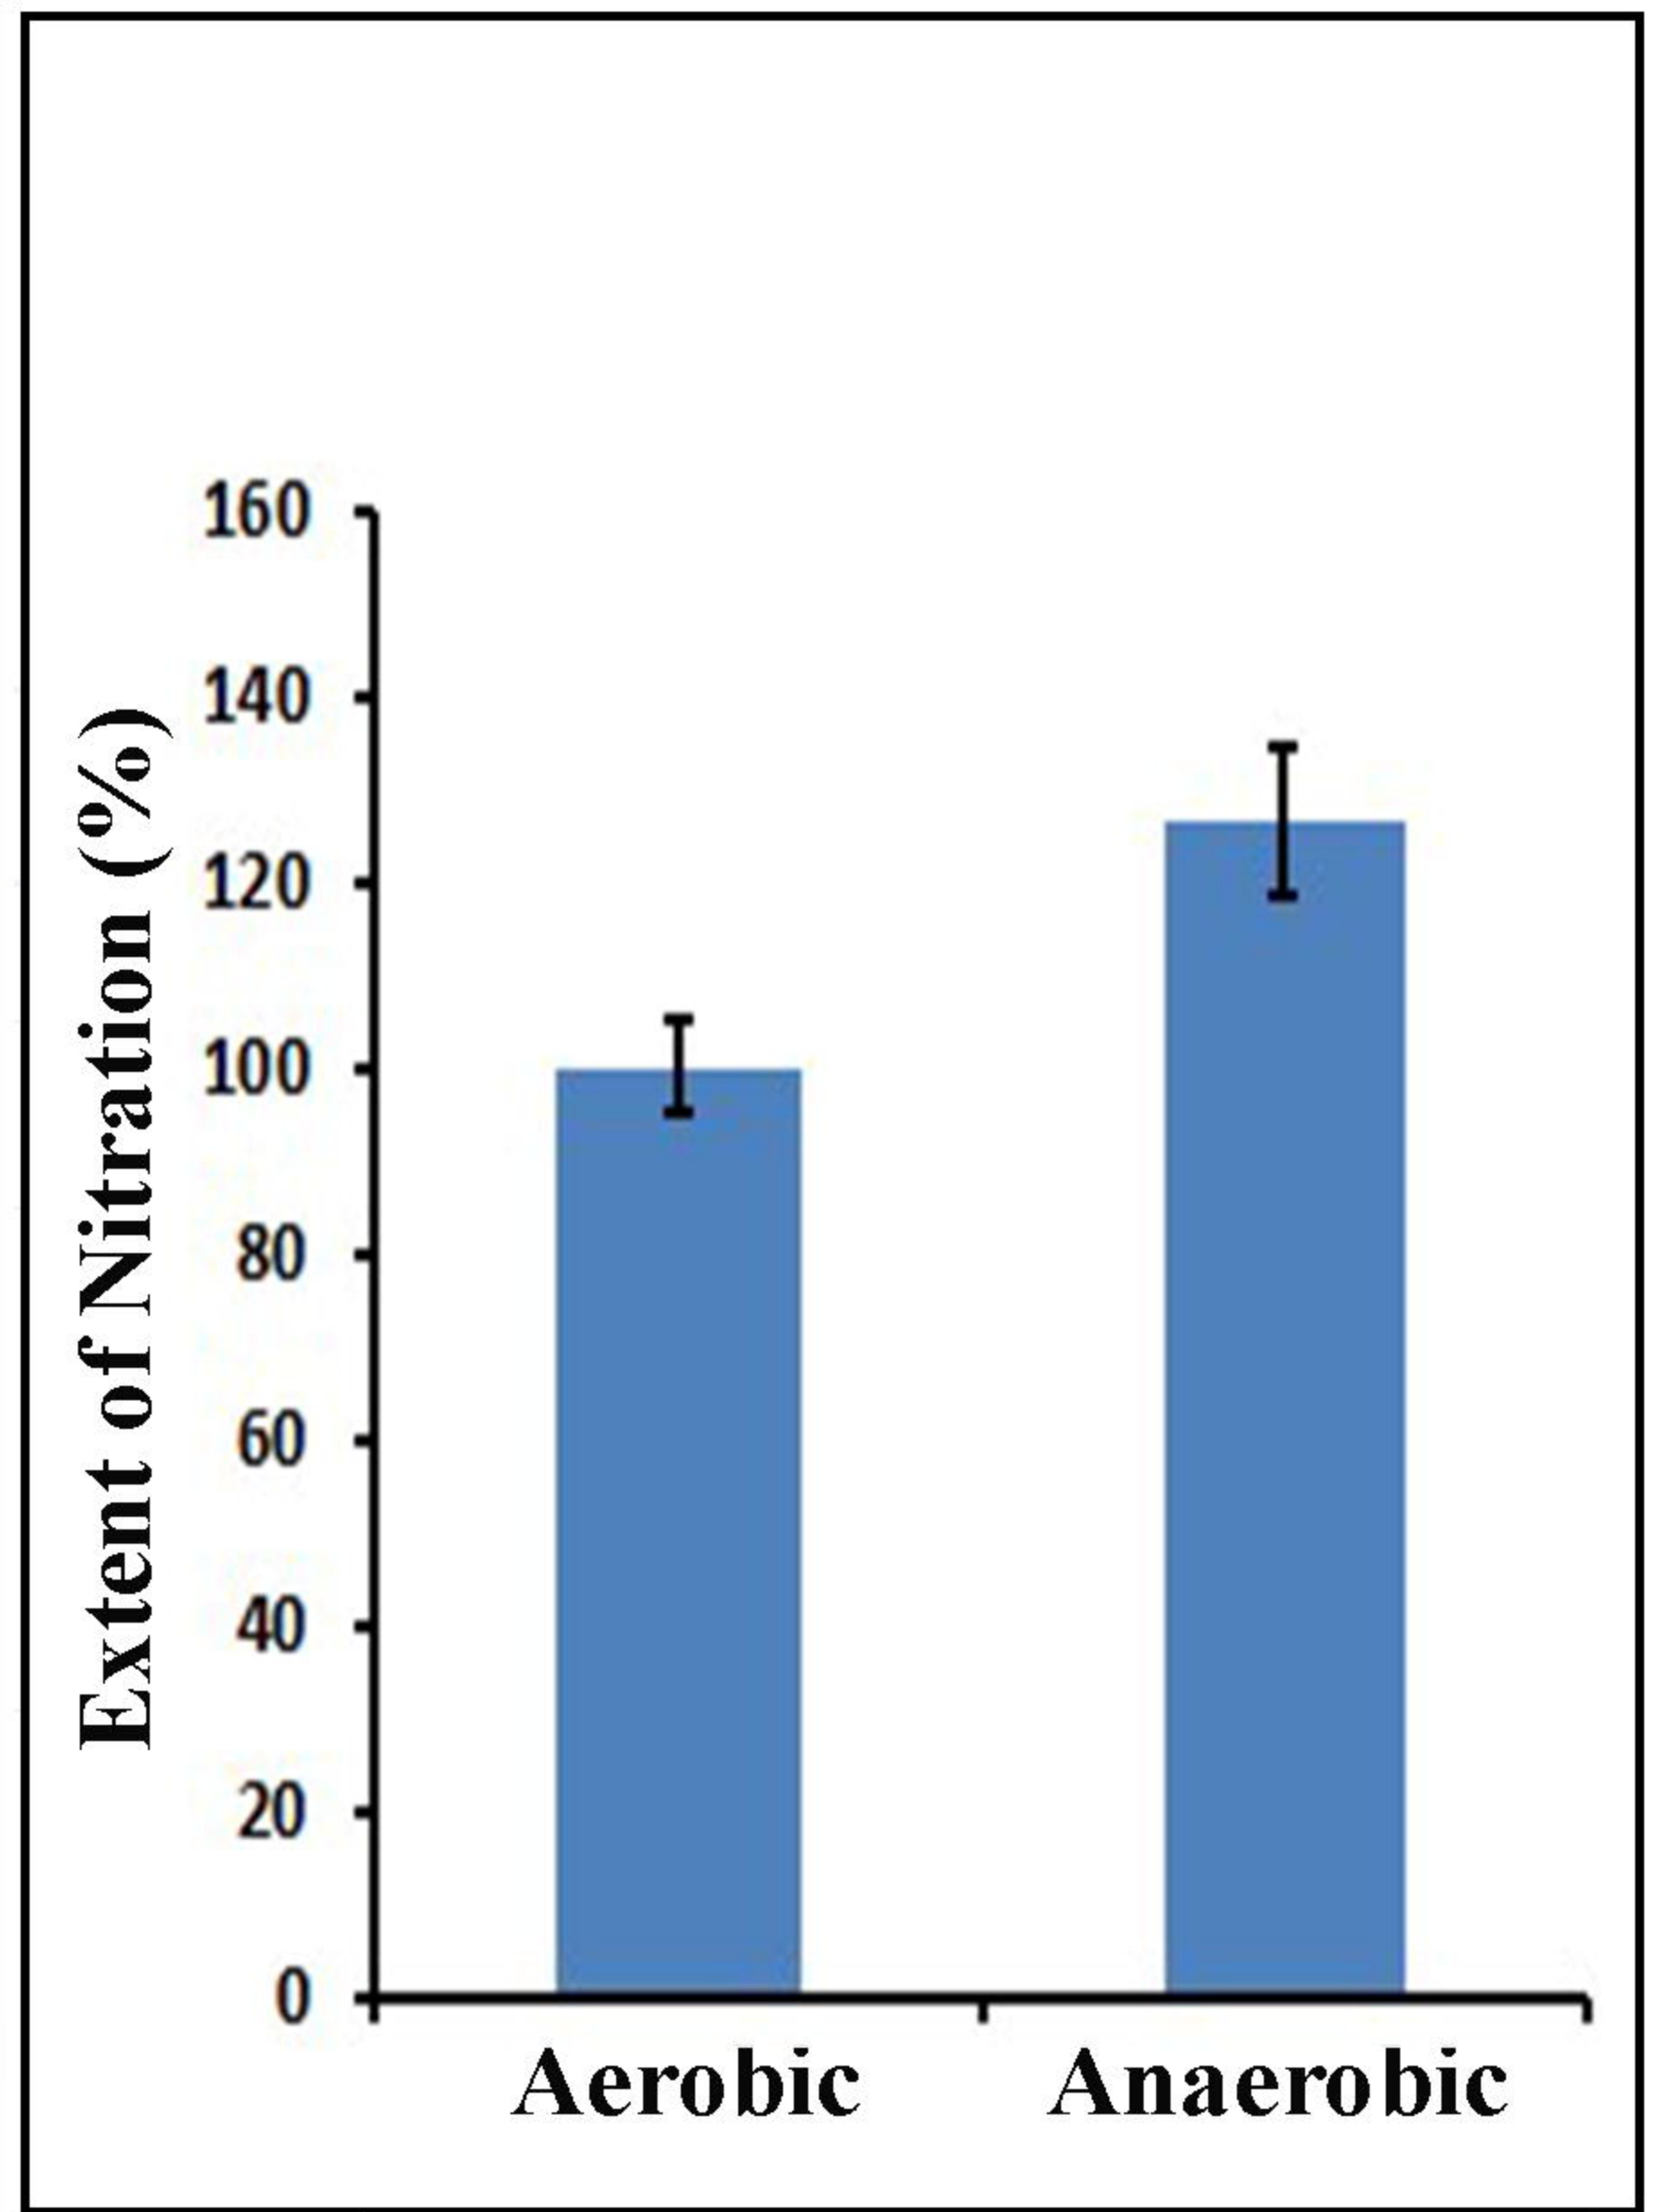

**Densitometric analysis**

**Supplementary Figure 1**
